# Supplementary material for: A [3+2] cycloaddition reaction for the synthesis of spiro[indoline-3,3′-pyrrolidines] and evaluation of cytotoxicity towards cancer cells
Source: Royal Society of Chemistry journal article supplement (doi:10.1039/c9nj00994a), 2019-01-01
Supplement: c9nj00994a1.pdf [file c9nj00994a1.pdf]

**[3+2] cycloaddition reaction for synthesis of spiro[indoline-3,3'-pyrrolidines]  
and evaluation of cytotoxicity to cancer cells**

Ying Huang<sup>a,b</sup>, Yi-Xin Huang<sup>b</sup>, Jing Sun<sup>a</sup>, Chao-Guo Yan<sup>a,\*</sup>

**Supporting Information**

**Characterization data, <sup>1</sup>H, <sup>13</sup>C and HR-MS spectra of the compounds** 2-49

**Preliminary evaluation on the anticancer activities of synthesized compounds  
on 4T1, CT26, HepG2 and A549 cancer cell lines (200 µg·mL<sup>-1</sup>)** 50-52

**5'-ethyl-2'-methyl-(3*S*,4'*R*,5'*R*)-4'-benzoyl-2'-(2-methoxy-2-oxoethyl)-2-oxospiro[indoline-3,3'-pyrrolidine]-2',5'-dicarboxylate (1a)**

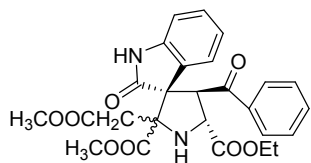

white solid, 71%, m.p. 167~168°C; <sup>1</sup>H NMR (400 MHz, CDCl<sub>3</sub>) δ: **Major isomer:** 7.45~7.40 (m, 3H, ArH), 7.27~7.23 (m, 3H, ArH), 7.14 (brs, 1H, NH), 7.12~7.08 (m, 1H, ArH), 7.01~6.97 (m, 1H, ArH), 6.47 (d, *J* = 7.6Hz, 1H, ArH), 5.20~5.17 (m, 1H, CH), 5.00 (d, *J* = 7.6Hz, 1H, CH), 4.27~4.19 (m, 2H, CH), 3.78 (d, *J* = 6.4Hz, 1H, NH), 3.70 (s, 3H, OCH<sub>3</sub>), 3.28 (d, *J* = 2.8Hz, 2H, CH<sub>2</sub>), 3.20 (s, 3H, OCH<sub>3</sub>), 1.30~1.24 (m, 3H, CH<sub>3</sub>); **Minor isomer:** 6.56 (d, *J* = 8.0Hz, 1H, ArH), 5.13~5.11 (m, 1H, CH), 5.06 (d, *J* = 7.6Hz, 1H, CH), 3.74 (s, 3H, OCH<sub>3</sub>), 3.61 (s, 3H, OCH<sub>3</sub>), 2.51 (d, *J* = 16.8Hz, 1H, CH<sub>2</sub>), 2.15 (d, *J* = 16.8Hz, 1H, CH<sub>2</sub>), **ratio of major/minor = 90:10**; <sup>13</sup>C NMR (100 MHz, CDCl<sub>3</sub>) δ: 195.8, 175.7, 173.5, 171.4, 170.7, 139.8, 136.7, 133.0, 129.2, 128.1, 127.0, 125.2, 122.4, 109.0, 74.9, 61.9, 61.7, 59.1, 56.8, 52.2, 51.9, 39.9, 14.1; IR(KBr) ν: 3343, 3147, 1746, 1710, 1193cm<sup>-1</sup>; MS (*m/z*): HRMS (ESI) Calcd. for C<sub>26</sub>H<sub>27</sub>N<sub>2</sub>O<sub>8</sub> ([M+H]<sup>+</sup>): 495.1767, found: 495.1787.

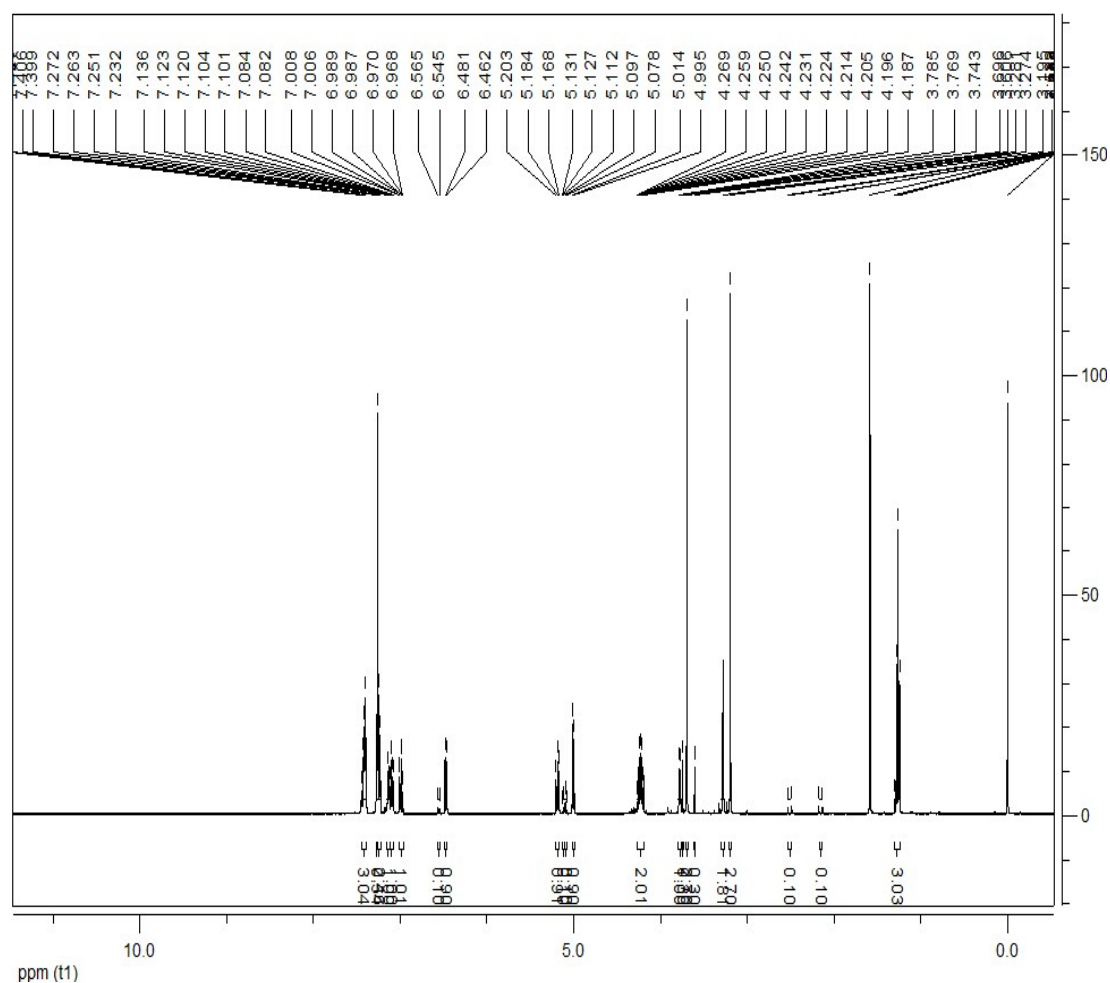

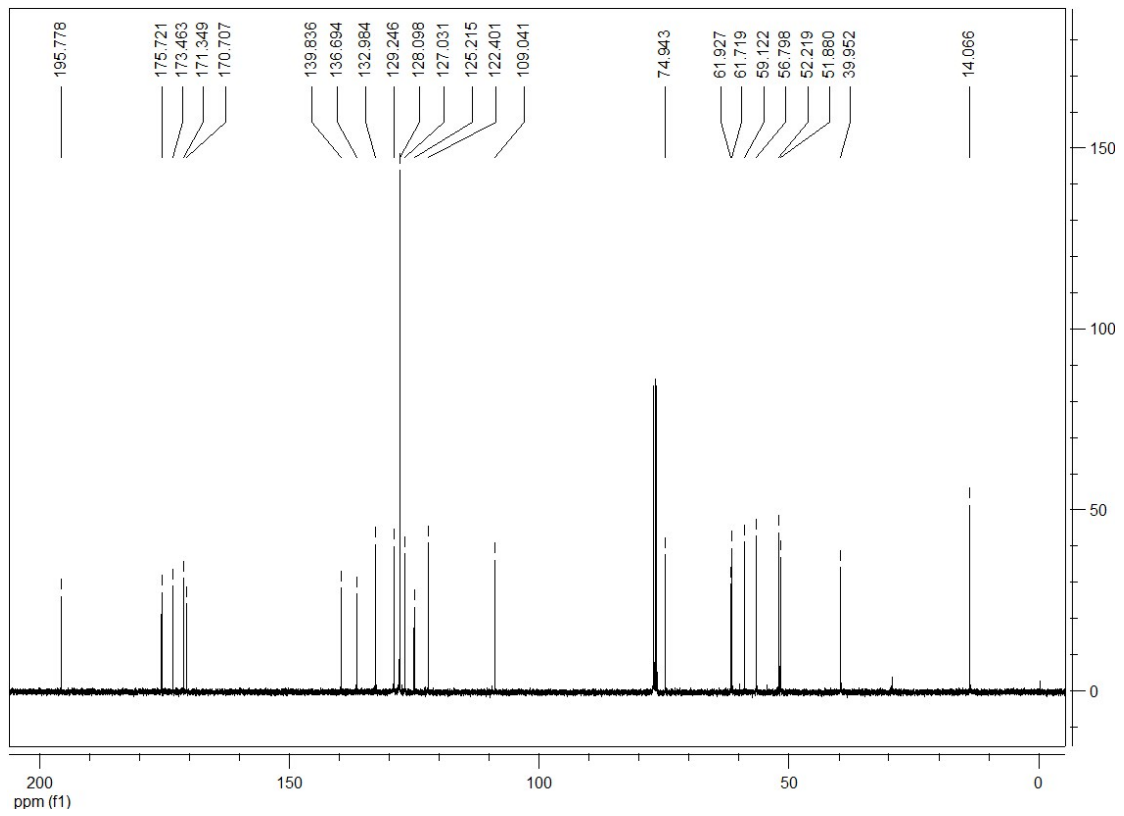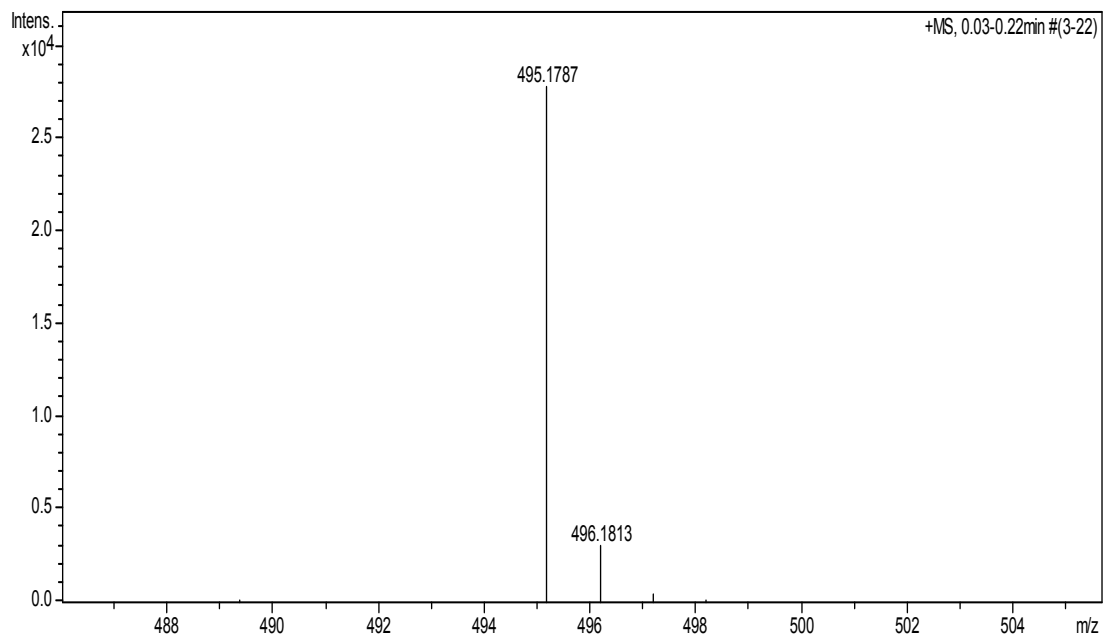

**5'-ethyl-2'-methyl-(3*S*,4'*R*,5'*R*)-4'-benzoyl-5-fluoro-2'-(2-methoxy-2-oxoethyl)-2-oxospiro[indoline-3,3'-pyrrolidine]-2',5'-dicarboxylate (1b)**

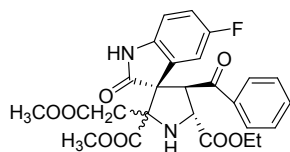

viscous oil, 77%; <sup>1</sup>H NMR (400 MHz, CDCl<sub>3</sub>) δ: **Major**

**isomer:** 7.48~7.43 (m, 3H, ArH), 7.30~7.28 (m, 1H, ArH),

7.26~7.20 (m, 2H, ArH, NH), 7.20~7.18 (m, 1H, ArH),

6.93~6.88 (m, 1H, ArH), 6.53~6.50 (m, 1H, ArH), 5.15~5.06

(m, 2H, CH), 4.33~4.21 (m, 2H, CH), 3.91 (s, 1H, NH), 3.74 (s, 3H, OCH<sub>3</sub>), 3.62 (s,

3H, OCH<sub>3</sub>), 2.53 (d, *J* = 16.8Hz, 1H, CH<sub>2</sub>), 2.16 (d, *J* = 16.8Hz, 1H, CH<sub>2</sub>), 1.29~1.24

(m, 3H, CH<sub>3</sub>); **Minor isomer:** 7.09~7.07 (m, 1H, ArH), 6.86~6.81 (m, 1H, ArH),

6.43~6.40 (m, 1H, ArH), 4.98 (d, *J* = 7.6Hz, 1H, CH), 3.70 (s, 3H, OCH<sub>3</sub>), 3.27 (s, 3H,

OCH<sub>3</sub>), 3.31 (d, *J* = 16.8Hz, 1H, CH<sub>2</sub>), 3.22 (d, *J* = 16.8Hz, 1H, CH<sub>2</sub>); **ratio of**

**major/minor = 56:44;** <sup>13</sup>C NMR (100 MHz, CDCl<sub>3</sub>) δ: 196.2, 195.4, 175.9, 175.1,

173.6, 173.4, 172.4, 171.6, 171.2, 170.6, 158.8 (d, *J* = 240.7Hz), 158.4 (d, *J* =

240.2Hz), 136.7, 136.5, 136.3(d, *J* = 2.1Hz), 136.2 (d, *J* = 2.1Hz), 133.2, 133.0, 128.2,

128.1, 128.1, 126.9 (d, *J* = 8.4Hz), 126.8 (d, *J* = 8.4Hz), 116.1 (d, *J* = 23.5Hz), 115.8

(d, *J* = 23.6Hz), 115.3 (d, *J* = 25.3Hz), 115.0 (d, *J* = 25.6Hz), 110.5 (d, *J* = 8.1Hz),

109.7 (d, *J* = 7.9Hz), 74.8, 73.0, 63.5, 62.3, 61.8, 61.5, 60.1, 59.0, 56.3, 54.3, 52.4,

52.3, 51.9, 51.8, 39.8, 39.7, 14.1, 14.0; IR(KBr) ν: 3346, 1724, 1207cm<sup>-1</sup>; MS (*m/z*):

HRMS (ESI) Calcd. for C<sub>26</sub>H<sub>26</sub>FN<sub>2</sub>O<sub>8</sub> ([M+H]<sup>+</sup>): 513.1673, found: 513.1697.

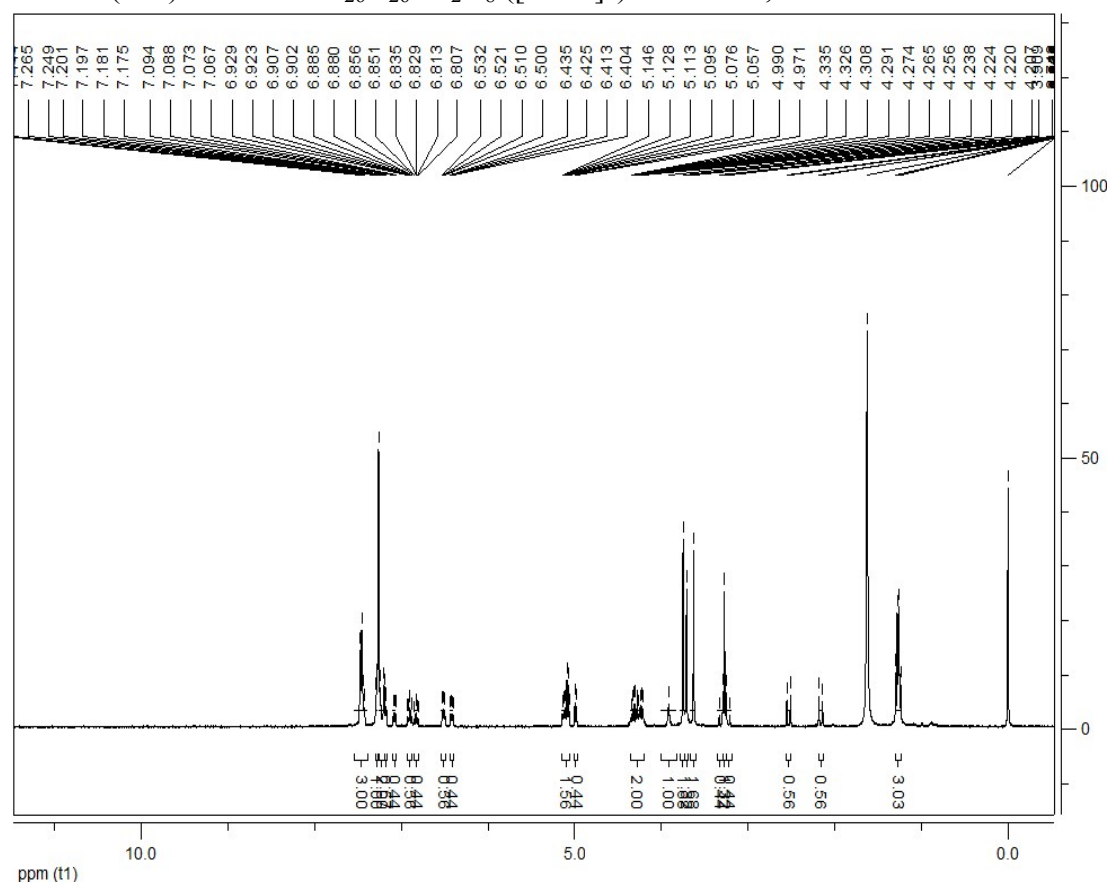

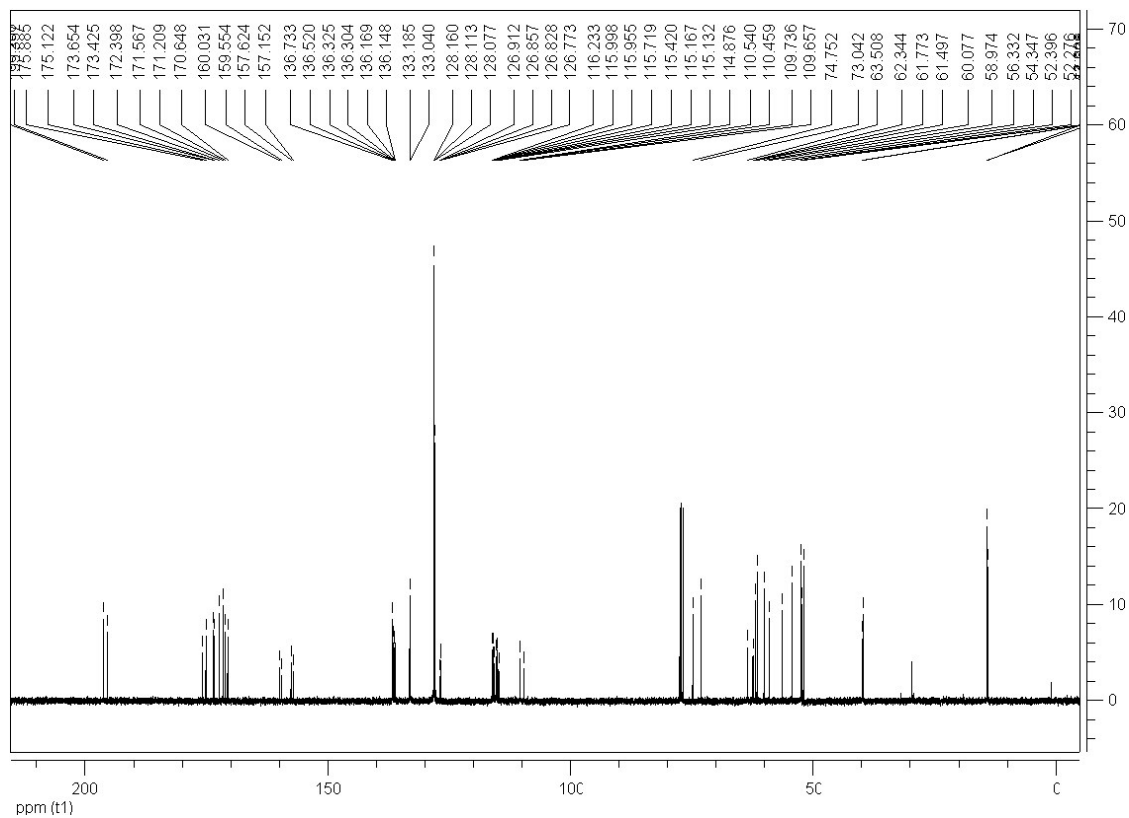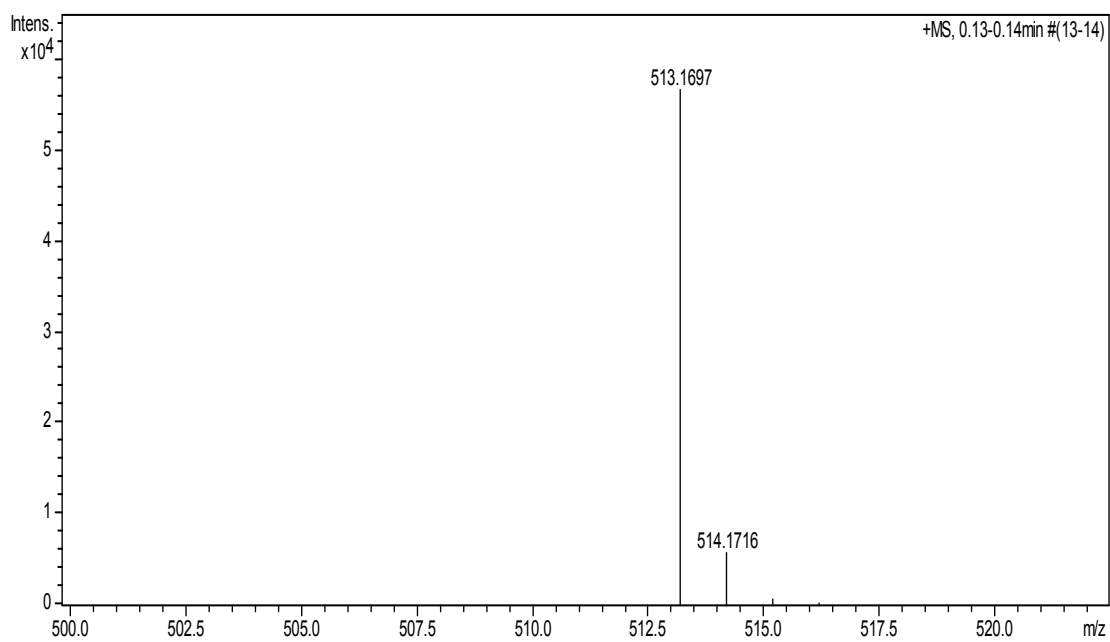

**5'-ethyl-2'-methyl-(3S,4'R,5'R)-5-fluoro-2'-(2-methoxy-2-oxoethyl)-4'-(4-methylbenzoyl)-2-oxospiro[indoline-3,3'-pyrrolidine]-2',5'-dicarboxylate (1c)**

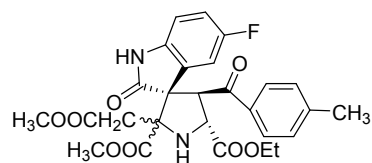

white solid, 50%, m.p. 196~198°C; <sup>1</sup>H NMR (400 MHz,

CDCl<sub>3</sub>) δ: **Major isomer:** 7.42 (d, *J* = 8.0Hz, 2H, ArH), 7.21~7.19 (m, 2H, ArH, NH), 7.07 (d, *J* = 8.0Hz, 2H,

ArH), 6.92~6.87 (m, 1H, ArH), 6.55~6.52 (m, 1H, ArH), 5.10~5.04 (m, 2H, CH), 4.34~4.23 (m, 2H, CH), 3.90 (s, 1H, NH), 3.74 (s, 3H, OCH<sub>3</sub>), 3.62 (s, 3H, OCH<sub>3</sub>), 2.53 (d, *J* = 17.2Hz, 1H, CH<sub>2</sub>), 2.32 (s, 3H, CH<sub>3</sub>), 2.17 (d, *J* = 16.8Hz, 1H, CH<sub>2</sub>), 1.26 (t, *J* = 7.2Hz, 3H, CH<sub>3</sub>); **Minor isomer:** 6.46~6.43 (m, 1H, ArH), 3.70 (s, 3H, OCH<sub>3</sub>), 3.26 (s, 3H, OCH<sub>3</sub>), **ratio of major/minor = 94:6**; <sup>13</sup>C NMR (100 MHz, CDCl<sub>3</sub>) δ: 195.4, 174.6, 173.6, 172.4, 171.5, 159.0 (d, *J* = 241Hz), 144.0, 135.9, 135.9, 134.2, 128.9, 128.4, 126.9 (d, *J* = 8.2Hz), 116.0 (d, *J* = 23.6Hz), 115.6 (d, *J* = 25.4Hz), 110.2 (d, *J* = 8.1Hz), 73.2, 63.5, 61.4, 60.3, 53.9, 52.4, 51.9, 39.7, 21.5, 14.2; IR(KBr) ν: 3371, 3184, 1739, 1714, 1208cm<sup>-1</sup>; MS (*m/z*): HRMS (ESI) Calcd. for C<sub>27</sub>H<sub>28</sub>FN<sub>2</sub>O<sub>8</sub> ([M+H]<sup>+</sup>): 527.1830, found: 527.1857.

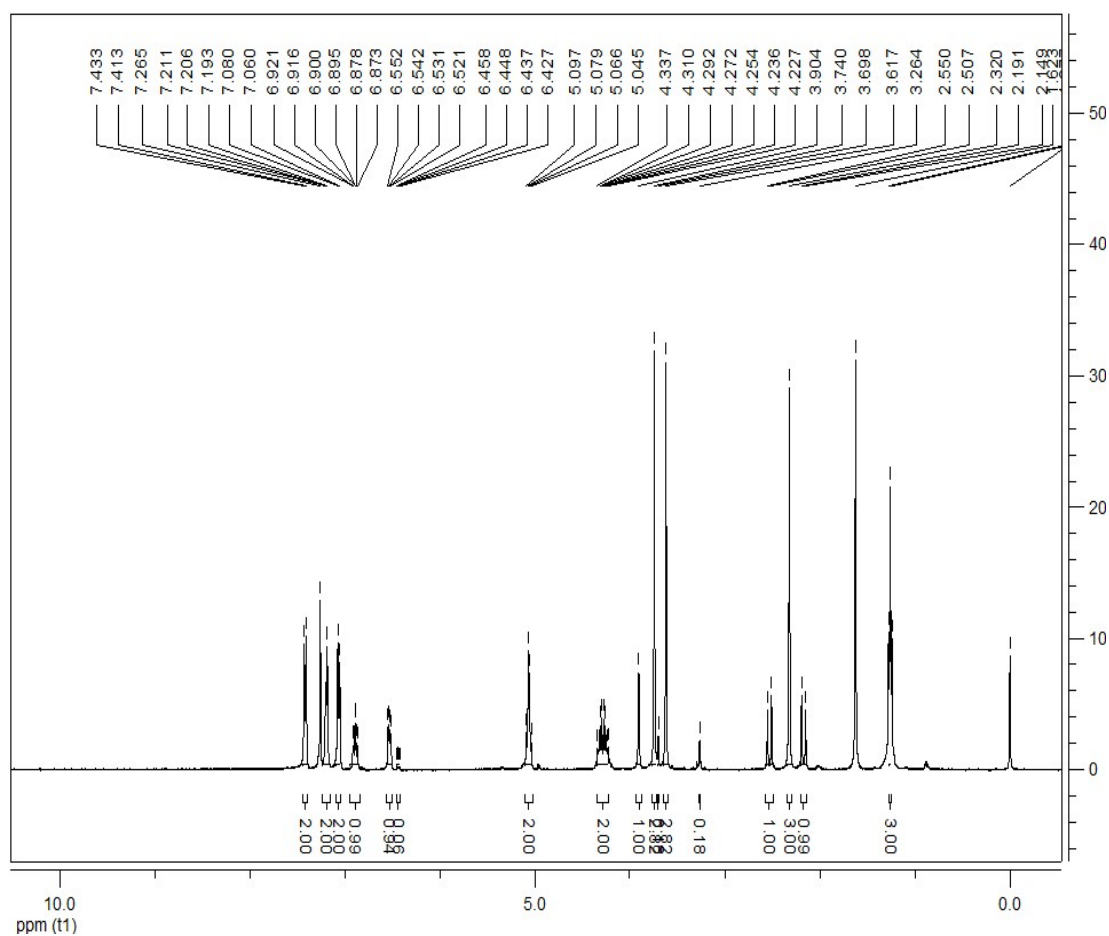

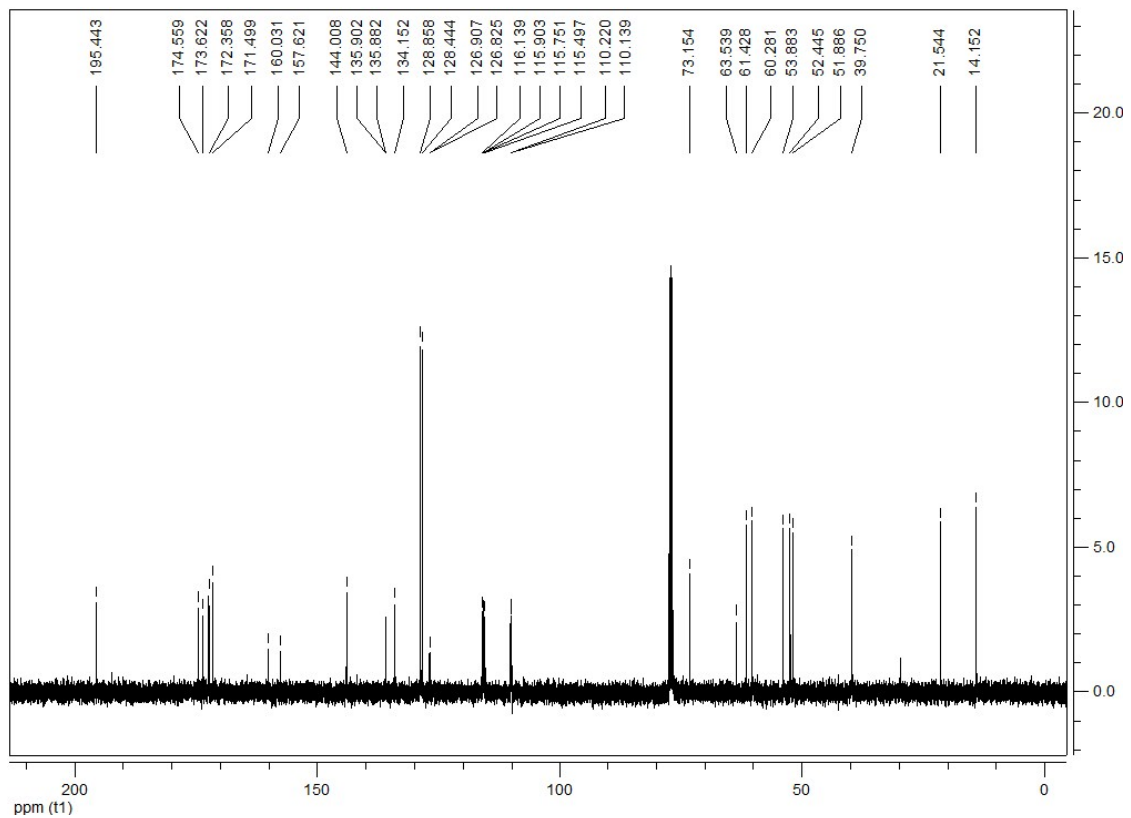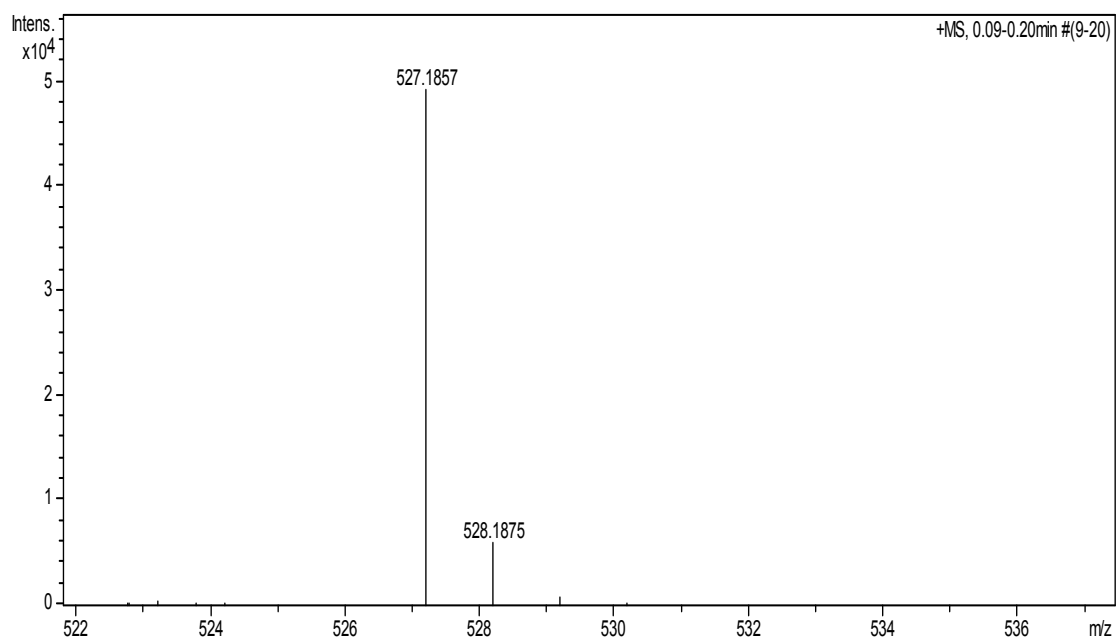

**5'-ethyl-2'-methyl-(2'R,3S,4'R,5'R)-5-chloro-2'-(2-methoxy-2-oxoethyl)-4'-(4-methoxybenzoyl)-2-oxospiro[indoline-3,3'-pyrrolidine]-2',5'-dicarboxylate (1d)**

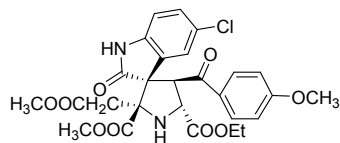

white solid, 51%, m.p. 180~181 °C; <sup>1</sup>H NMR (400 MHz, CDCl<sub>3</sub>) δ: 7.56 (d, *J* = 8.8Hz, 2H, ArH), 7.45 (d, *J* = 1.6Hz, 1H, ArH), 7.30 (s, 1H, NH), 7.16 (dd, *J*<sub>1</sub> = 8.0Hz, *J*<sub>2</sub> = 1.6Hz, 1H, ArH), 6.75 (d, *J* = 8.8Hz, 2H, ArH), 6.55 (d, *J* = 8.4Hz, 1H, ArH), 5.06 (brs, 2H, CH), 4.33~4.22 (m, 2H, CH), 3.90 (s, 1H, NH), 3.79 (s, 3H, OCH<sub>3</sub>), 3.74 (s, 3H, OCH<sub>3</sub>), 3.62 (s, 3H, OCH<sub>3</sub>), 2.53 (d, *J* = 16.8Hz, 1H, CH<sub>2</sub>), 2.18 (d, *J* = 16.8Hz, 1H, CH<sub>2</sub>), 1.25 (t, *J* = 7.2Hz, 3H, CH<sub>3</sub>); <sup>13</sup>C NMR (100 MHz, CDCl<sub>3</sub>) δ: 193.9, 174.5, 173.7, 172.4, 171.5, 163.6, 138.5, 130.7, 129.5, 129.4, 128.3, 128.0, 127.0, 113.4, 110.6, 73.2, 63.5, 61.4, 60.5, 55.3, 53.4, 52.5, 51.9, 39.8, 14.1; IR(KBr) ν: 3383, 3196, 1741, 1710, 1209cm<sup>-1</sup>; MS (*m/z*): HRMS (ESI) Calcd. for C<sub>27</sub>H<sub>28</sub>ClN<sub>2</sub>O<sub>9</sub> ([M+H]<sup>+</sup>): 559.1483, found: 559.1494.

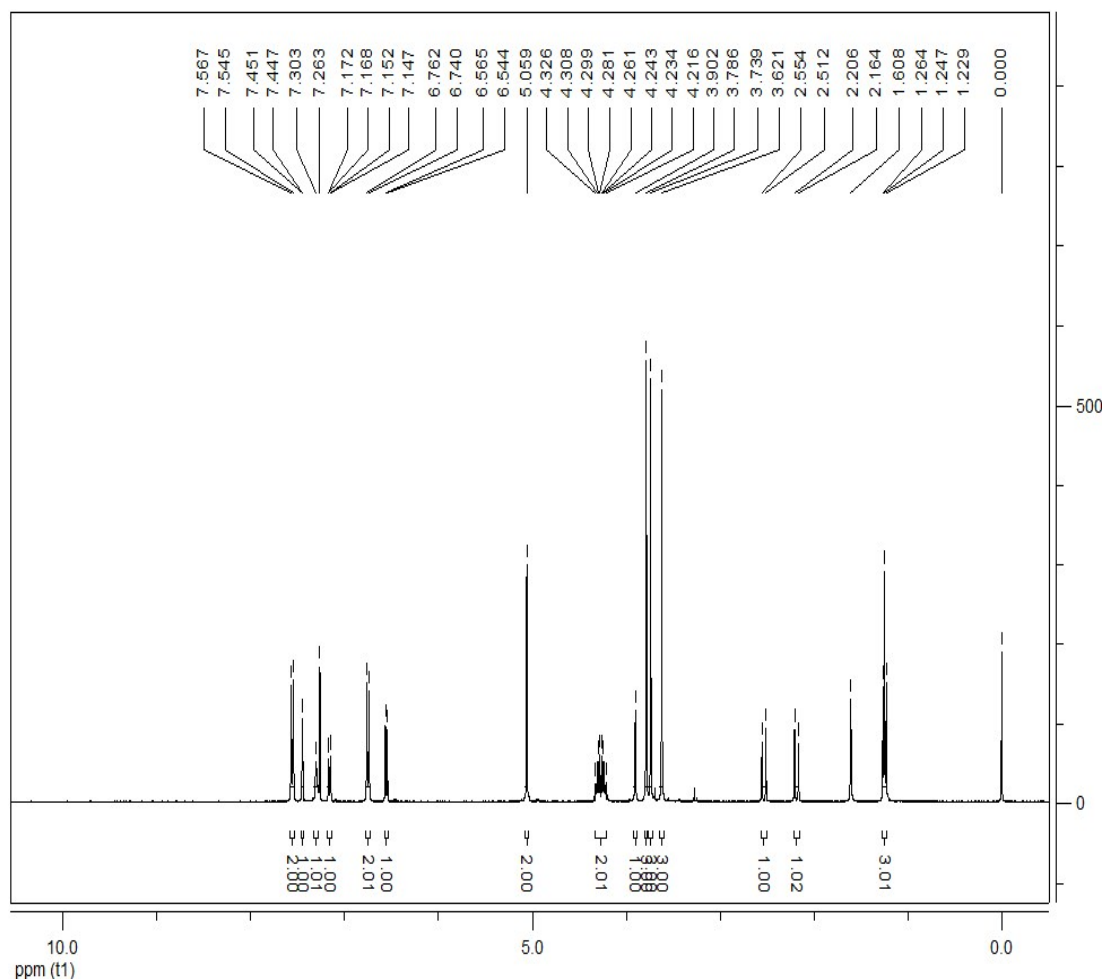



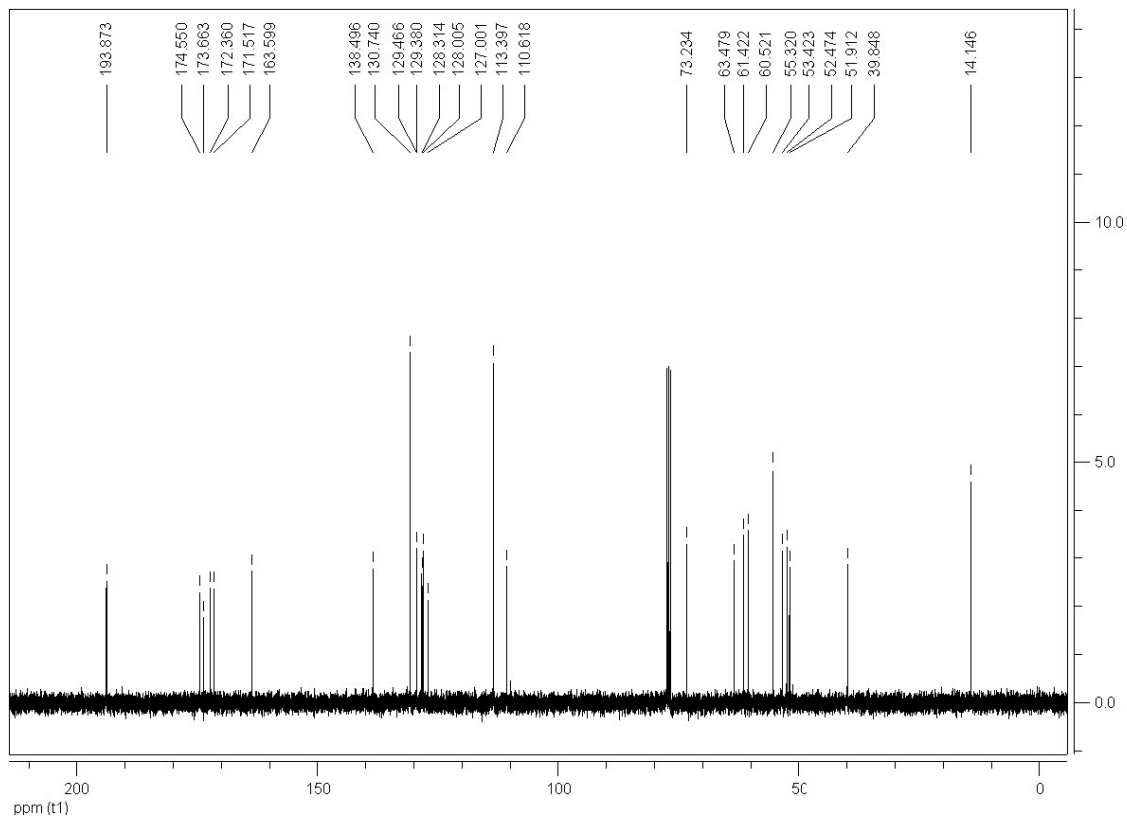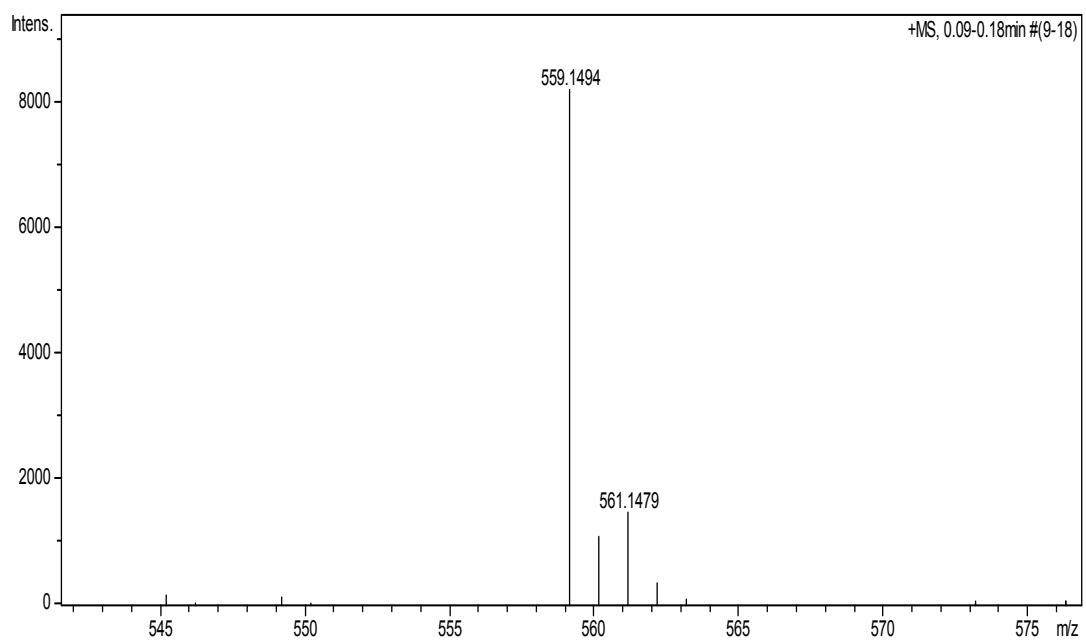

**5'-ethyl-2'-methyl-(2'R,3S,4'R,5'R)-5-chloro-2'-(2-methoxy-2-oxoethyl)-4'-(4-methylbenzoyl)-2-oxospiro[indoline-3,3'-pyrrolidine]-2',5'-dicarboxylate (1e)**

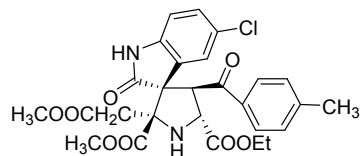

white solid, 61%, m.p. 199~200 °C; <sup>1</sup>H NMR (400 MHz, CDCl<sub>3</sub>) δ: 7.42 (d, *J* = 8.0Hz, 3H, ArH), 7.18~7.15 (m, 2H, ArH, NH), 7.07 (d, *J* = 8.0Hz, 2H, ArH), 6.53 (d, *J* = 8.4Hz, 1H, ArH), 5.09~5.04 (m, 2H, CH), 4.33~4.23 (m, 2H, CH), 3.90 (s, 1H, NH), 3.74 (s, 3H, OCH<sub>3</sub>), 3.62 (s, 3H, OCH<sub>3</sub>), 2.52 (d, *J* = 16.8Hz, 1H, CH<sub>2</sub>), 2.32 (s, 3H, CH<sub>3</sub>), 2.17 (d, *J* = 16.8Hz, 1H, CH<sub>2</sub>), 1.26 (t, *J* = 6.8Hz, 3H, CH<sub>3</sub>); <sup>13</sup>C NMR (100 MHz, CDCl<sub>3</sub>) δ: 195.4, 174.4, 173.6, 172.4, 171.5, 144.0, 138.5, 134.1, 129.4, 128.9, 128.4, 128.3, 127.8, 126.9, 110.7, 73.1, 63.3, 61.5, 60.2, 53.8, 52.5, 51.9, 39.8, 21.5, 14.1; IR(KBr) ν: 3382, 3193, 1740, 1710, 1208cm<sup>-1</sup>; MS (*m/z*): HRMS (ESI) Calcd. for C<sub>27</sub>H<sub>28</sub>ClN<sub>2</sub>O<sub>8</sub> ([M+H]<sup>+</sup>): 543.1534, found: 543.1559.

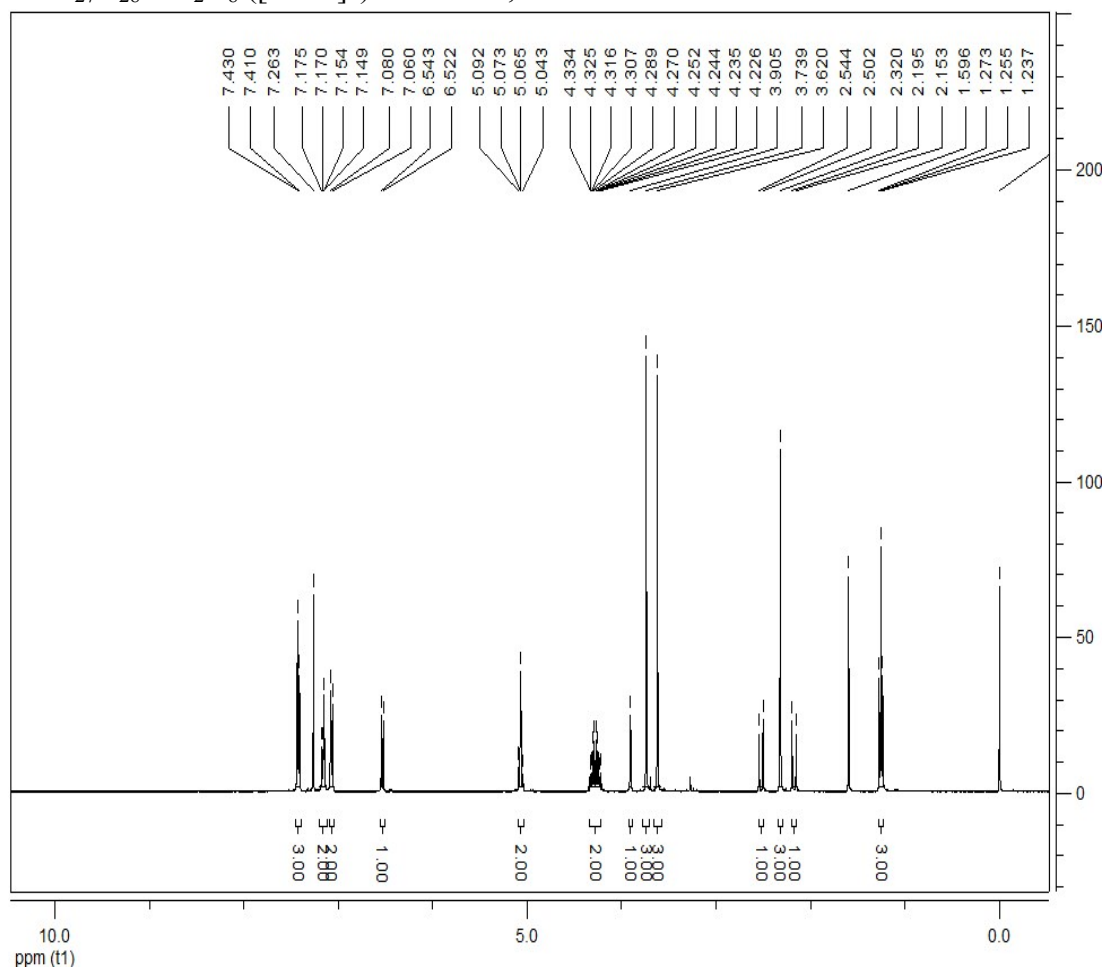

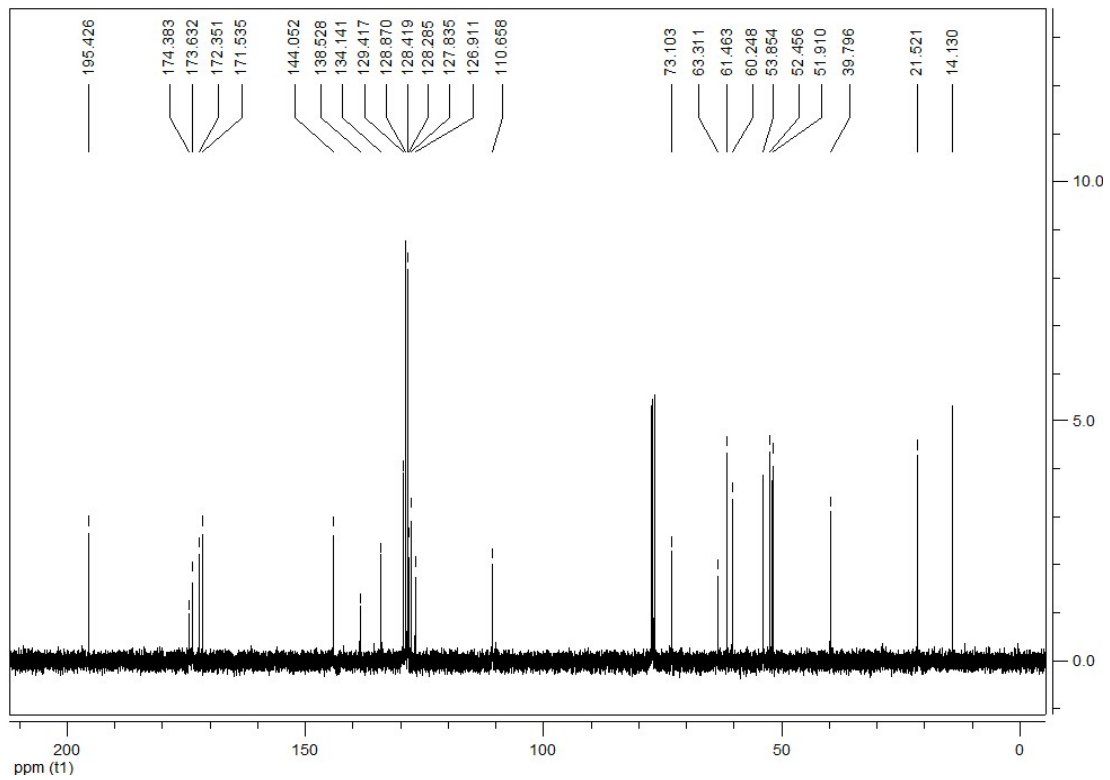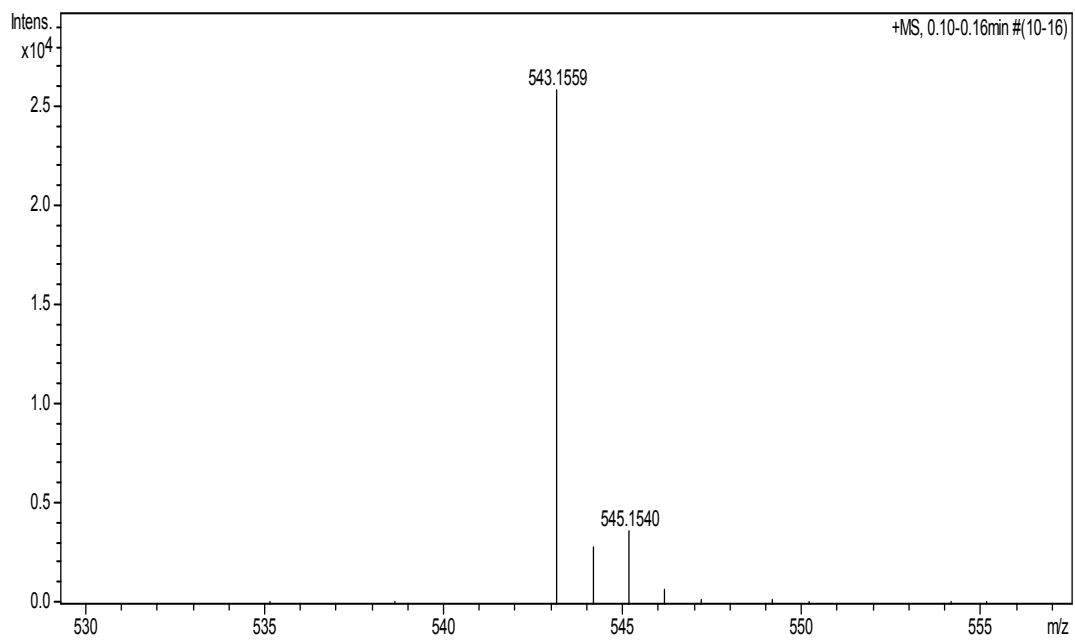

**5'-ethyl-2'-methyl-(3*S*,4'*R*,5'*R*)-2'-(2-methoxy-2-oxoethyl)-5-methyl-4'-(4-methylbenzoyl)-2-oxospiro[indoline-3,3'-pyrrolidine]-2',5'-dicarboxylate (1f)**

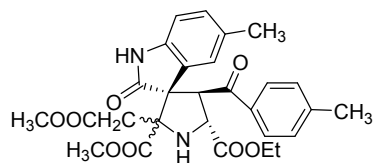

white solid, 55%, m.p. 183~185°C; <sup>1</sup>H NMR (400

MHz, CDCl<sub>3</sub>) δ: **Major isomer:** 7.37 (d, *J* = 8.4Hz, 2H, ArH), 7.21 (s, 1H, NH), 7.06~7.04 (m, 3H, ArH), 6.96

(d, *J* = 8.0Hz, 1H, ArH), 6.46 (d, *J* = 8.0Hz, 1H, ArH), 5.11 (dd, *J*<sub>1</sub> = 7.6Hz, *J*<sub>2</sub> = 1.6Hz, 1H, CH), 5.05 (d, *J* = 8.0Hz, 1H, CH), 4.34~4.23 (m, 2H, CH), 3.91 (d, *J* = 1.2Hz, 1H, NH), 3.74 (s, 3H, OCH<sub>3</sub>), 3.61 (s, 3H, OCH<sub>3</sub>), 2.55 (d, *J* = 17.2Hz, 1H, CH<sub>2</sub>), 2.34 (s, 3H, CH<sub>3</sub>), 2.31 (s, 3H, CH<sub>3</sub>), 2.19 (d, *J* = 17.2Hz, 1H, CH<sub>2</sub>), 1.26 (t, *J* = 7.2Hz, 3H, CH<sub>3</sub>); **Minor isomer:** 7.17 (s, 1H, NH), 6.89 (d, *J* = 7.6Hz, 1H, ArH), 6.38 (d, *J* = 8.0Hz, 1H, ArH), 5.19~5.15 (m, 1H, CH), 4.96 (d, *J* = 7.6Hz, 1H, CH), 3.69 (s, 3H, OCH<sub>3</sub>), 3.28 (d, *J* = 4.8Hz, 2H, CH), 3.20 (s, 3H, OCH<sub>3</sub>), **ratio of major/minor = 90:10**; <sup>13</sup>C NMR (100 MHz, CDCl<sub>3</sub>) δ: 195.8, 174.7, 174.0, 172.5, 171.7, 143.6, 137.4, 134.4, 132.5, 129.7, 128.7, 128.4, 128.2, 125.2, 109.3, 73.2, 63.2, 61.4, 60.4, 54.1, 52.4, 51.8, 39.9, 21.5, 21.2, 14.2; IR(KBr) ν: 3382, 3176, 1740, 1705, 1205cm<sup>-1</sup>; MS (*m/z*): HRMS (ESI) Calcd. for C<sub>28</sub>H<sub>31</sub>N<sub>2</sub>O<sub>8</sub> ([M+H]<sup>+</sup>): 523.2080, found: 523.2103.

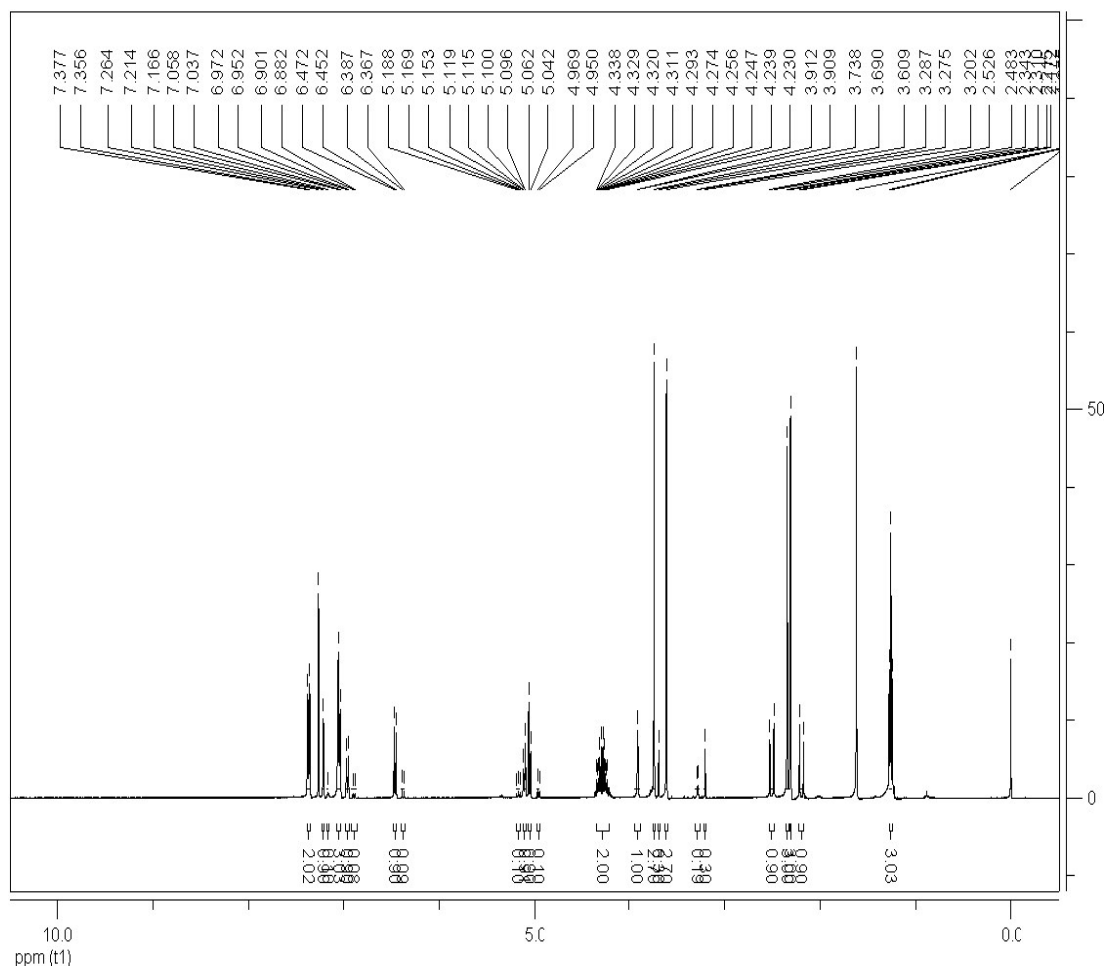

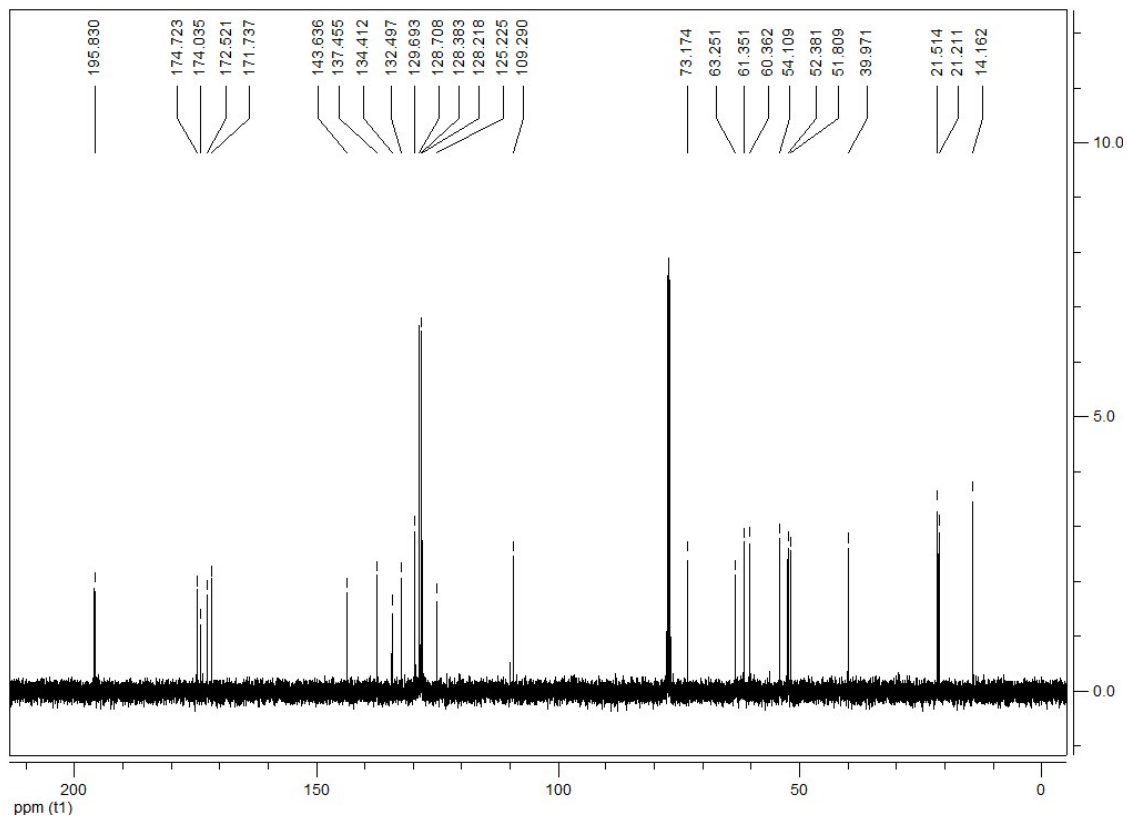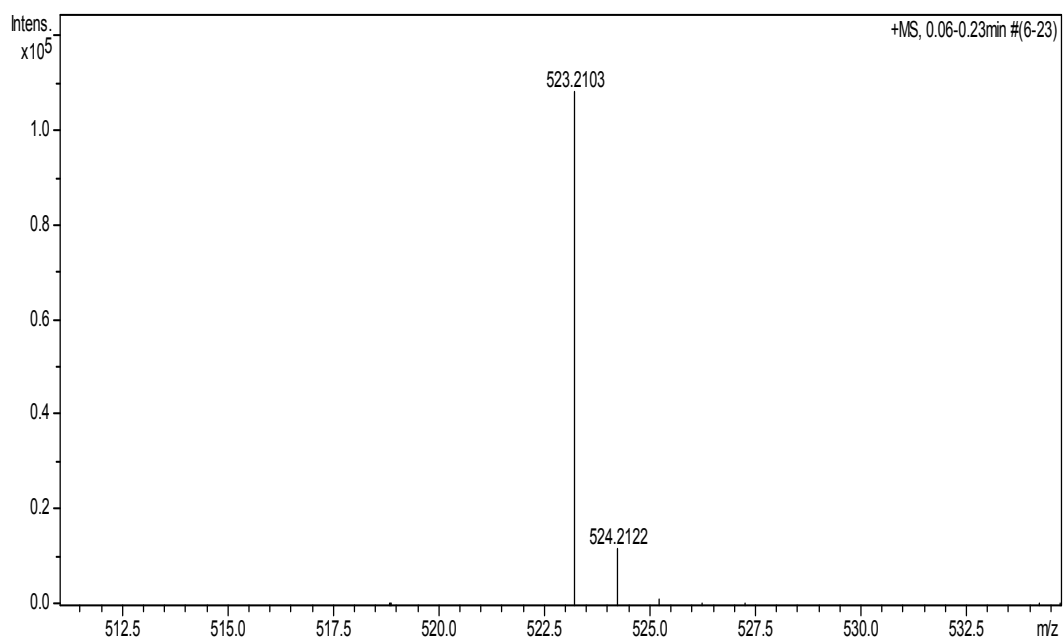

**5'-ethyl-2'-methyl-(3S,4'R,5'R)-4'-(4-chlorobenzoyl)-2'-(2-methoxy-2-oxoethyl)-5-methyl-2-oxospiro[indoline-3,3'-pyrrolidine]-2',5'-dicarboxylate (1g)**

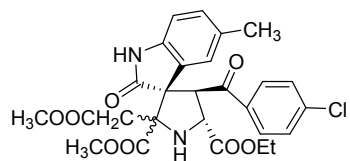

white solid, 75%, m.p. 182~184°C; <sup>1</sup>H NMR (400 MHz, CDCl<sub>3</sub>) δ: **Major isomer:** 7.39 (d, *J* = 8.4Hz, 2H, ArH), 7.23 (d, *J* = 8.4Hz, 2H, ArH), 7.20 (brs, 1H, NH), 7.09 (brs, 1H, ArH), 6.98 (d, *J* = 8.0Hz, 1H, ArH), 6.49 (d, *J* = 8.0Hz, 1H, ArH), 5.10~5.08 (m, 1H, CH), 5.02 (d, *J* = 7.6Hz, 1H, CH), 4.35~4.25 (m, 2H, CH), 3.90 (s, 1H, NH), 3.74 (s, 3H, OCH<sub>3</sub>), 3.61 (s, 3H, OCH<sub>3</sub>), 2.51 (d, *J* = 17.2Hz, 1H, CH<sub>2</sub>), 2.34 (s, 3H, CH<sub>3</sub>), 2.16 (d, *J* = 16.8Hz, 1H, CH<sub>2</sub>), 1.28 (t, *J* = 7.2Hz, 3H, CH<sub>3</sub>); **Minor isomer:** 7.04 (brs, 1H, ArH), 6.91 (d, *J* = 8.0Hz, 1H, ArH), 6.40 (d, *J* = 8.0Hz, 1H, ArH), 5.17~5.14 (m, 1H, CH), 4.93 (d, *J* = 7.6Hz, 1H, CH), 3.69 (s, 3H, OCH<sub>3</sub>), 3.26 (d, *J* = 6.0Hz, 2H, CH), 3.20 (s, 3H, OCH<sub>3</sub>), 2.31 (s, 3H, CH<sub>3</sub>), **ratio of major/minor = 90:10**; <sup>13</sup>C NMR (100 MHz, CDCl<sub>3</sub>) δ: 195.3, 174.7, 174.0, 172.4, 171.7, 139.3, 137.4, 135.3, 132.7, 129.9, 129.7, 128.3, 128.1, 125.0, 109.4, 73.1, 63.1, 61.5, 60.2, 54.4, 52.4, 51.8, 39.8, 21.2, 14.2; IR(KBr) ν: 3378, 3175, 1740, 1703, 1207cm<sup>-1</sup>; MS (*m/z*): HRMS (ESI) Calcd. for C<sub>27</sub>H<sub>28</sub>ClN<sub>2</sub>O<sub>8</sub> ([M+H]<sup>+</sup>): 543.1534, found: 543.1548.

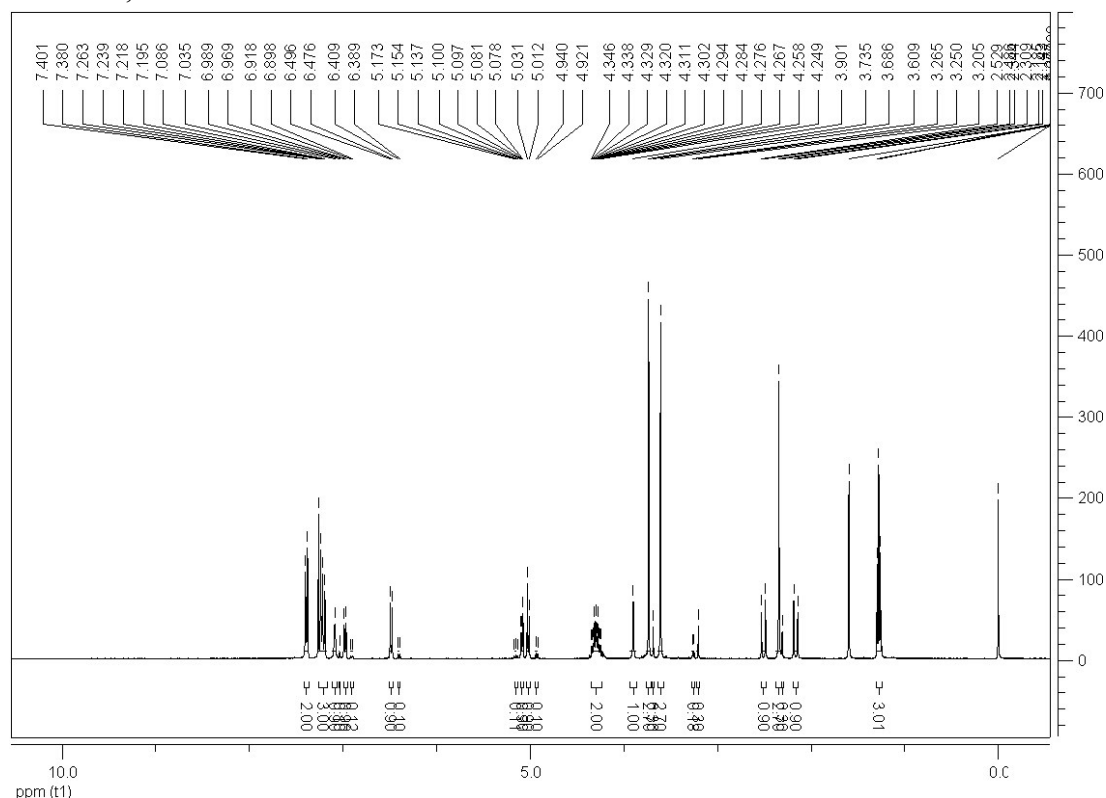

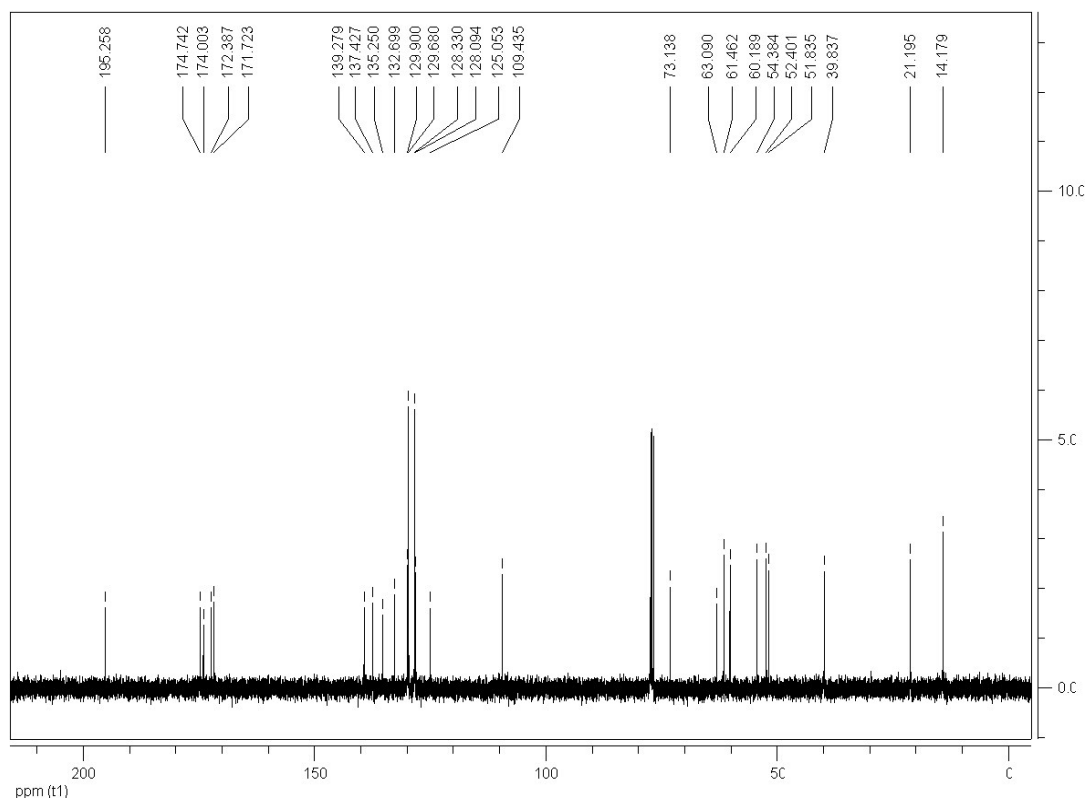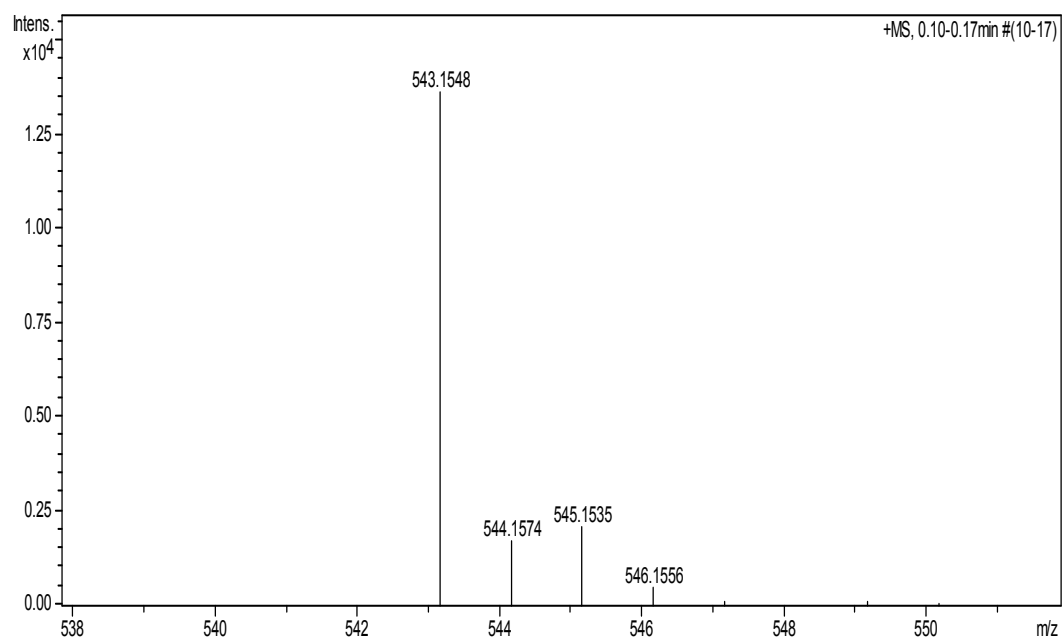

**5'-ethyl-2'-methyl-(3S,4'R,5'R)-4'-benzoyl-1-benzyl-2'-(2-methoxy-2-oxoethyl)-2-oxospiro[indoline-3,3'-pyrrolidine]-2',5'-dicarboxylate (1h)**

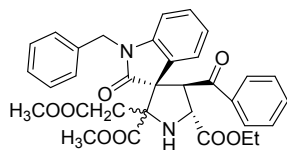

white solid, 80%, m.p. 157~158°C; <sup>1</sup>H NMR (400 MHz, CDCl<sub>3</sub>) δ: **Major isomer:** 7.48~7.36 (m, 4H, ArH), 7.29 (d, *J* = 8.0Hz, 2H, ArH), 7.21~7.16 (m, 3H, ArH), 7.12~7.03 (m, 2H, ArH), 6.90~6.89 (m, 2H, ArH), 6.37 (d, *J* = 7.6Hz, 1H, ArH), 5.16 (d, *J* = 7.6Hz, 1H, CH), 5.14~5.12 (m, 1H, CH), 4.70 (d, *J* = 15.6Hz, 1H, CH), 4.37~4.26 (m, 2H, CH), 3.96~3.92 (m, 2H, CH, NH), 3.79 (s, 3H, OCH<sub>3</sub>), 3.61 (s, 3H, OCH<sub>3</sub>), 2.40 (d, *J* = 16.8Hz, 1H, CH<sub>2</sub>), 2.11 (d, *J* = 17.2Hz, 1H, CH<sub>2</sub>), 1.31~1.26 (m, 3H, CH<sub>3</sub>); **Minor isomer:** 6.28 (d, *J* = 7.6Hz, 1H, ArH), 5.21 (d, *J* = 7.2Hz, 1H, CH), 5.07 (d, *J* = 7.2Hz, 1H, CH), 4.82 (d, *J* = 16.0Hz, 1H, CH), 3.70 (s, 3H, OCH<sub>3</sub>), 3.36 (d, *J* = 4.0Hz, 2H, CH), 2.99 (s, 3H, OCH<sub>3</sub>), **ratio of major/minor = 90:10**; <sup>13</sup>C NMR (100 MHz, CDCl<sub>3</sub>) δ: 196.4, 173.9, 173.1, 172.5, 171.6, 142.0, 136.9, 135.1, 132.8, 129.2, 128.7, 128.3, 128.0, 127.6, 127.3, 126.8, 124.8, 123.0, 109.0, 73.3, 62.7, 61.4, 60.2, 54.5, 52.5, 51.8, 43.8, 40.0, 14.2; IR(KBr) ν: 3375, 1740, 1210cm<sup>-1</sup>; MS (*m/z*): HRMS (ESI) Calcd. for C<sub>33</sub>H<sub>33</sub>N<sub>2</sub>O<sub>8</sub> ([M+H]<sup>+</sup>): 585.2237, found: 585.2259.

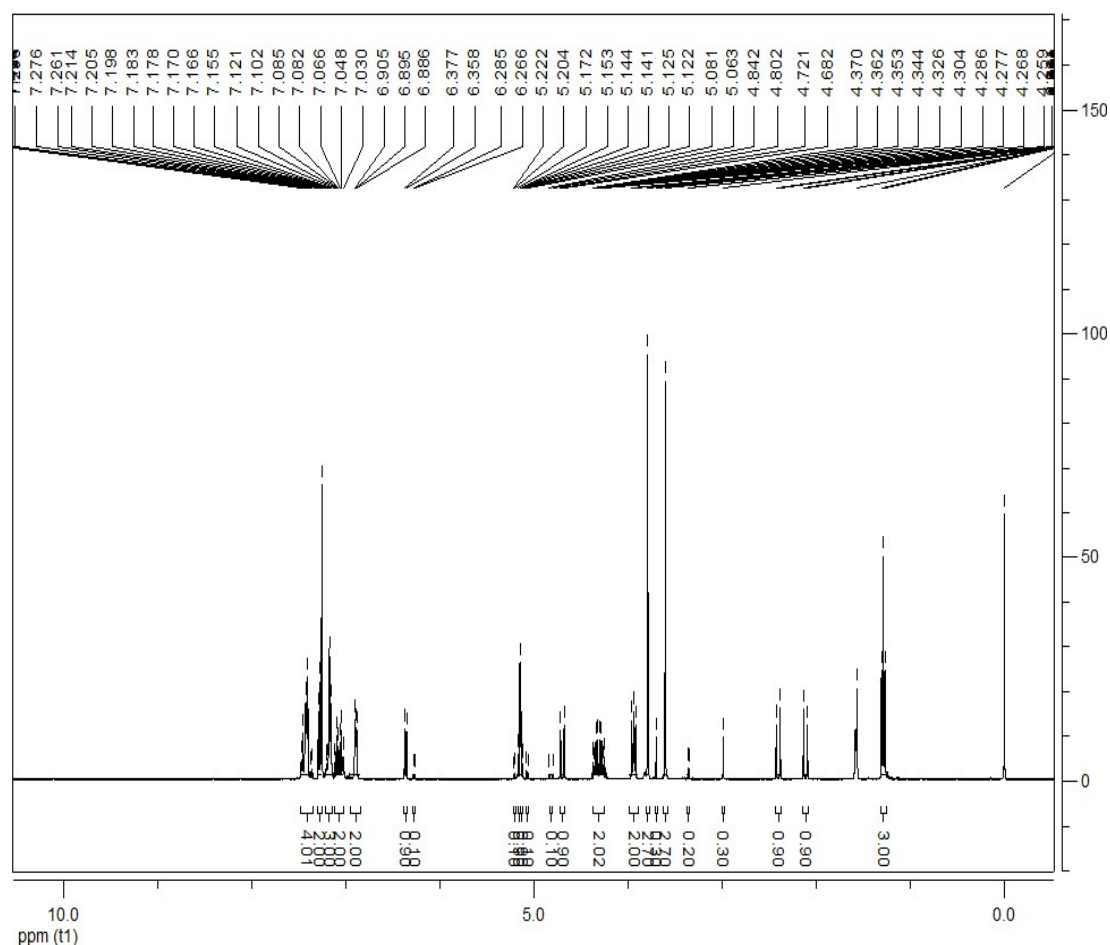



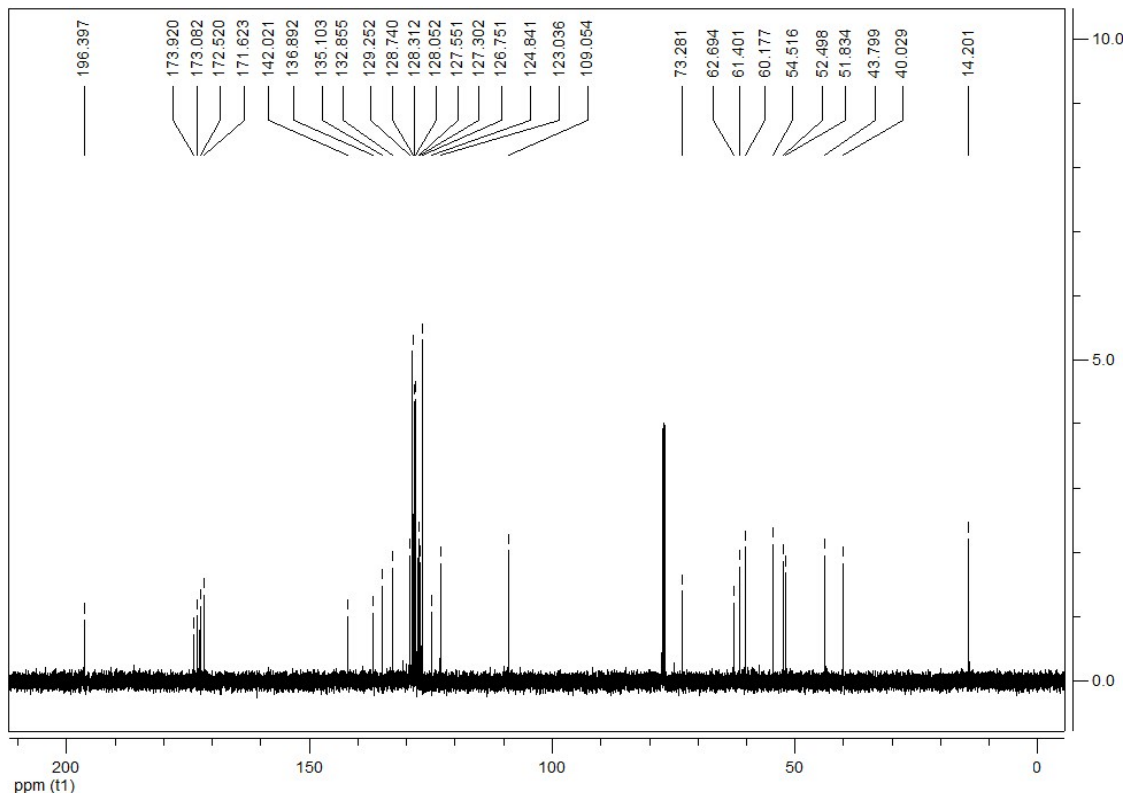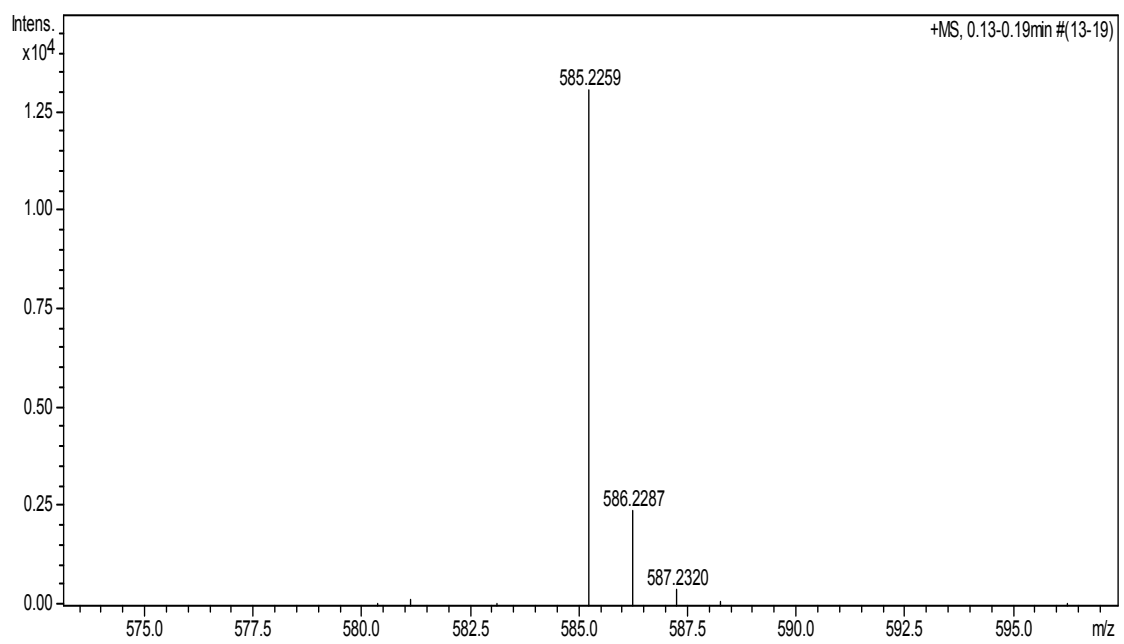



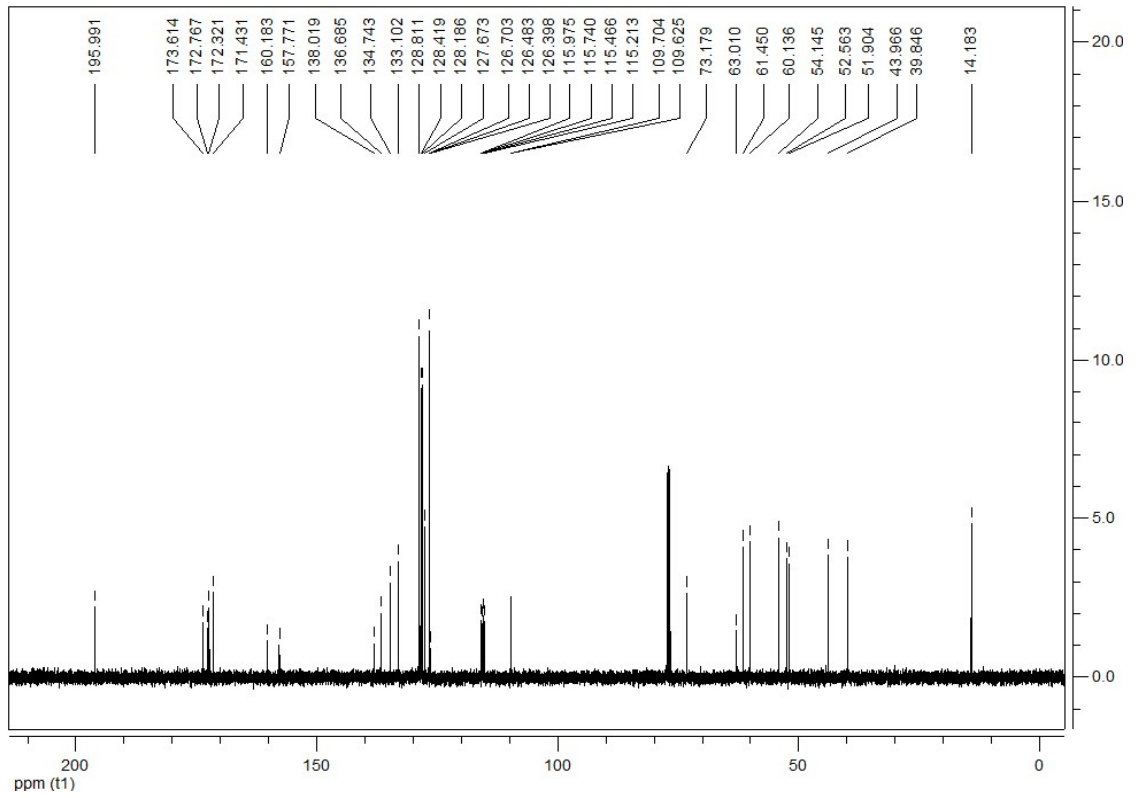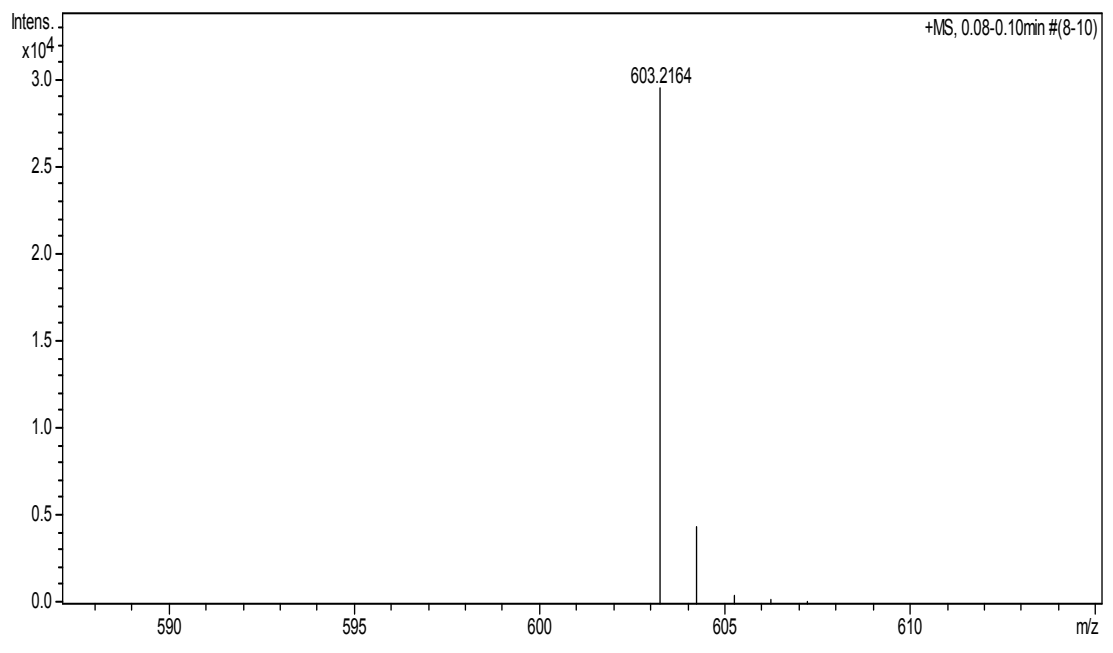

**5'-ethyl-2'-methyl-(3*S*,4'*R*,5'*R*)-1-benzyl-5-fluoro-2'-(2-methoxy-2-oxoethyl)-4'-(4-methylbenzoyl)-2-oxospiro[indoline-3,3'-pyrrolidine]-2',5'-dicarboxylate (1j)**

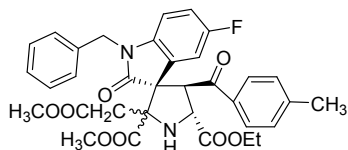

white solid, 60%, m.p. 182~183 °C; <sup>1</sup>H NMR (400 MHz,

CDCl<sub>3</sub>) δ: **Major isomer:** 7.48 (d, *J* = 8.0Hz, 2H, ArH), 7.25~7.22 (m, 1H, ArH), 7.18~7.10 (m, 5H, ArH),

6.83~6.88 (m, 3H, ArH), 6.32~6.29 (m, 1H, ArH), 5.18 (d, *J* = 7.6Hz, 1H, CH), 5.08 (d, *J* = 7.2Hz, 1H, CH), 4.64 (d, *J* = 16.0Hz, 1H, CH), 4.35~4.24 (m, 2H, CH), 4.18 (d, *J* = 15.6Hz, 1H, CH), 3.93 (s, 1H, NH), 3.80 (s, 3H, OCH<sub>3</sub>), 3.64 (s, 3H, OCH<sub>3</sub>), 2.43 (d, *J* = 17.2Hz, 1H, CH<sub>2</sub>), 2.36 (s, 3H, CH<sub>3</sub>), 2.12 (d, *J* = 16.8Hz, 1H, CH<sub>2</sub>), 1.28~1.25 (m, 3H, CH<sub>3</sub>); **Minor isomer:** 7.42 (d, *J* = 8.4Hz, 2H, ArH), 6.94 (d, *J* = 7.2Hz, 2H, ArH), 6.22~6.19 (m, 1H, ArH), 5.14 (d, *J* = 7.2Hz, 1H, CH), 5.05 (d, *J* = 7.6Hz, 1H, CH), 4.77 (d, *J* = 15.6Hz, 1H, CH), 4.00 (d, *J* = 15.6Hz, 1H, CH), 3.71 (s, 3H, OCH<sub>3</sub>), 3.35 (d, *J* = 4.0Hz, 2H, CH), 3.09 (s, 3H, OCH<sub>3</sub>), 2.37 (s, 3H, CH<sub>3</sub>), **ratio of major/minor = 90:10**; <sup>13</sup>C NMR (100 MHz, CDCl<sub>3</sub>) δ: 195.2, 173.7, 172.8, 172.4, 171.4, 158.9 (d, *J* = 241Hz), 144.1, 138.0, 134.7, 134.0, 128.9, 128.7, 128.7, 127.6, 126.7, 126.4 (d, *J* = 8.4Hz), 115.8 (d, *J* = 23.7Hz), 115.5 (d, *J* = 25.2Hz), 109.7 (d, *J* = 8.0Hz), 73.3, 63.2, 61.4, 60.4, 53.6, 52.6, 51.9, 44.0, 39.9, 21.6, 14.2; IR(KBr) ν: 3368, 1738, 1715, 1207cm<sup>-1</sup>; MS (*m/z*): HRMS (ESI) Calcd. for C<sub>34</sub>H<sub>34</sub>FN<sub>2</sub>O<sub>8</sub> ([M+H]<sup>+</sup>): 617.2299, found: 617.2310.

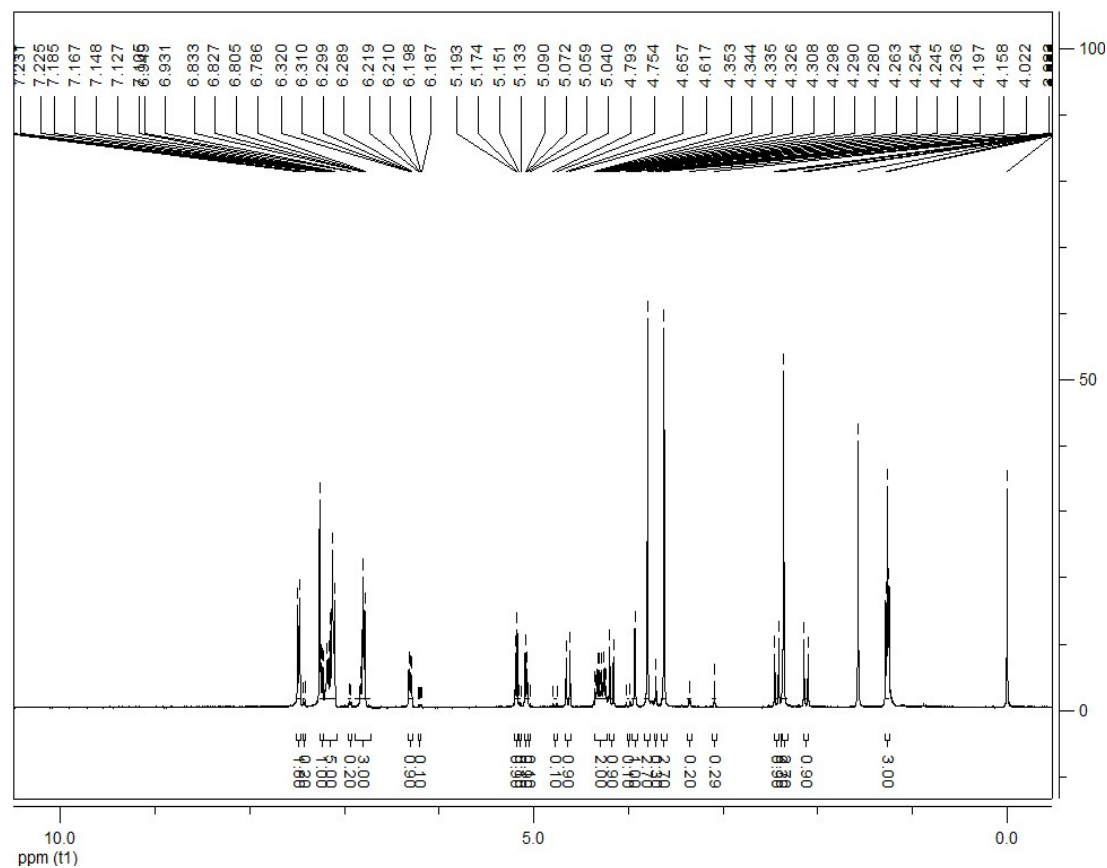

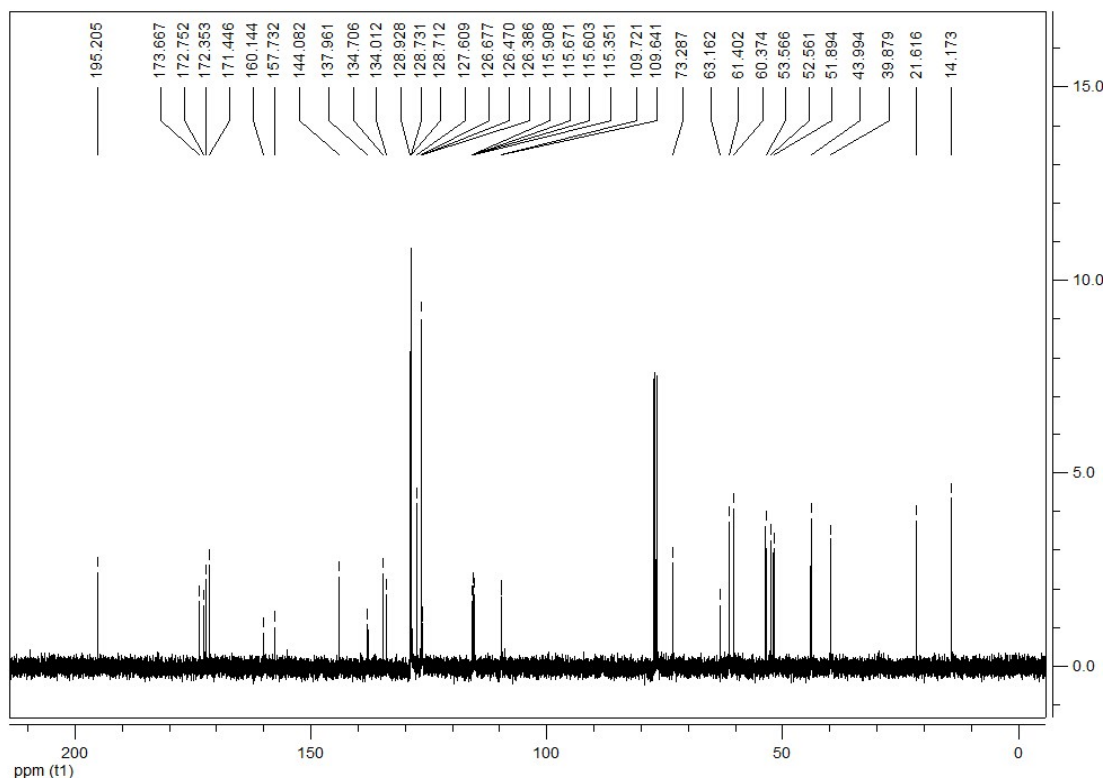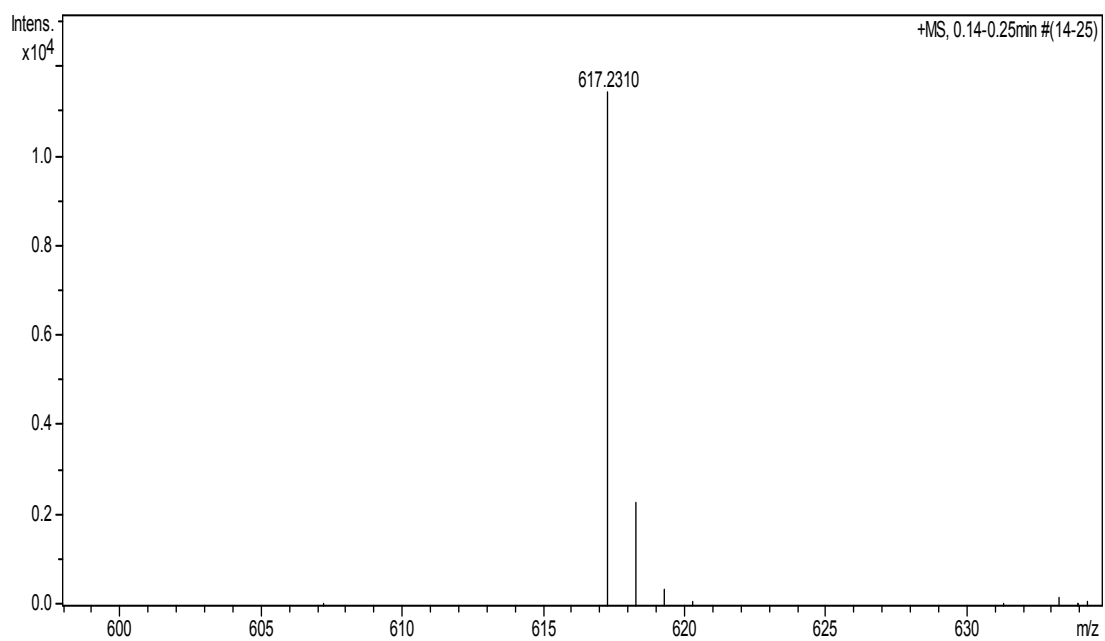



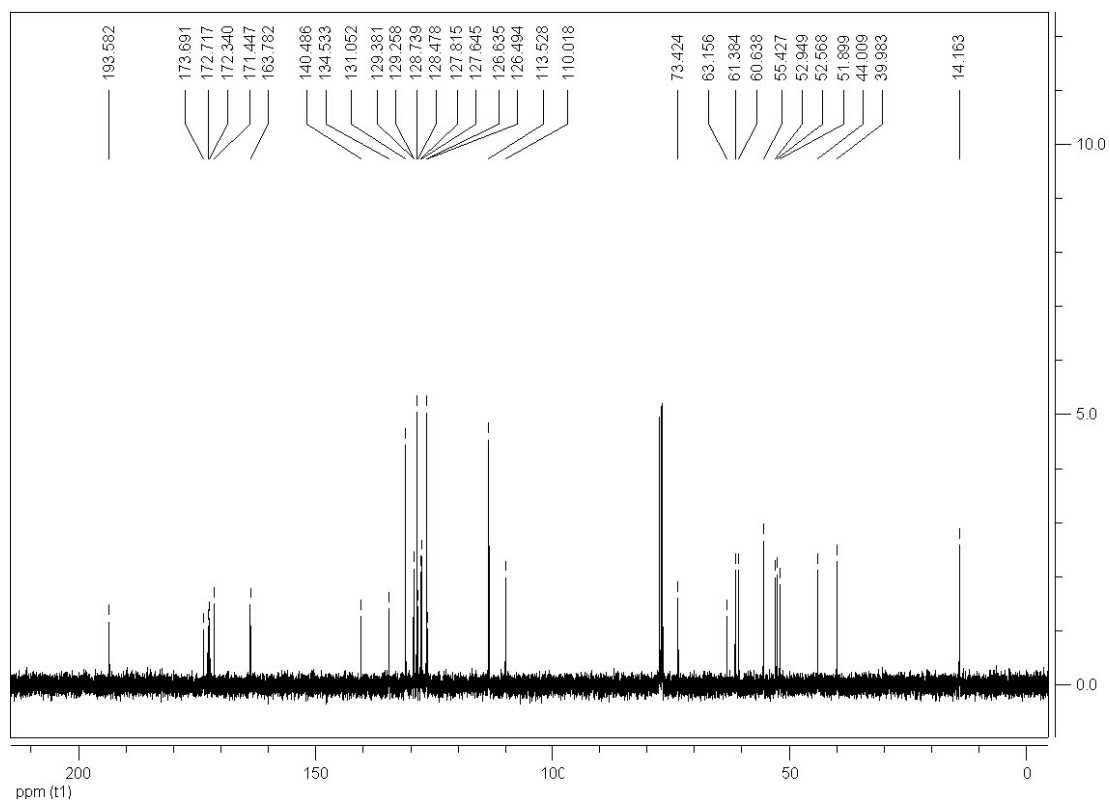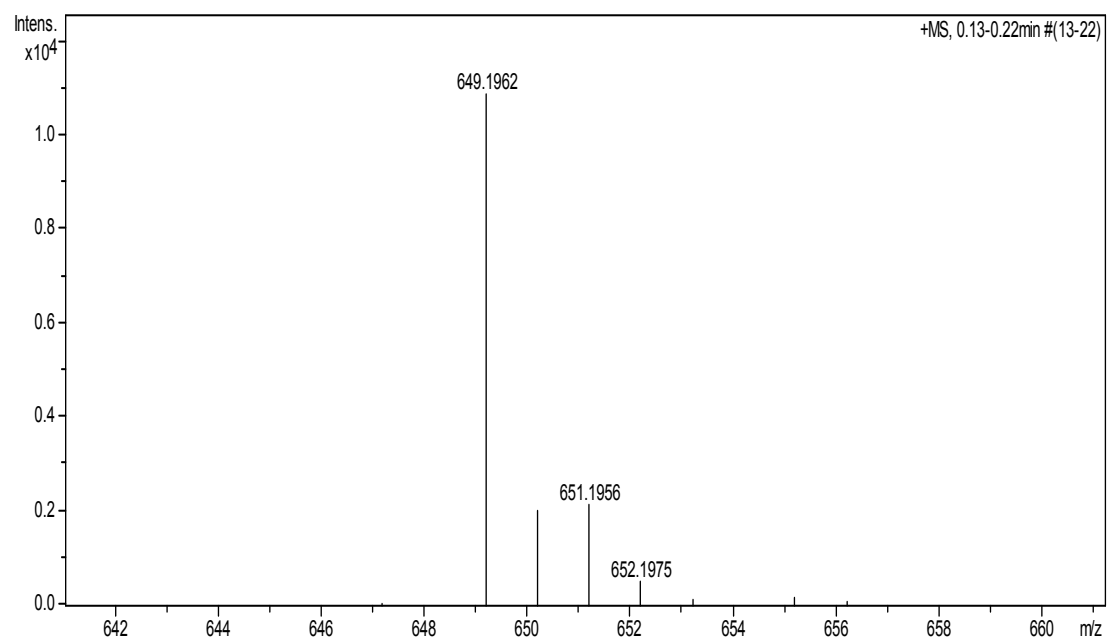

**5'-ethyl-2'-methyl-(3*S*,4'*R*,5'*R*)-4'-benzoyl-1-benzyl-5-chloro-2'-(2-methoxy-2-oxoethyl)-2-oxospiro[indoline-3,3'-pyrrolidine]-2',5'-dicarboxylate (11)**

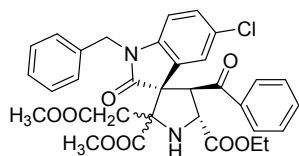

white solid, 72%, m.p. 138~140°C; <sup>1</sup>H NMR (400 MHz,

CDCl<sub>3</sub>) δ: **Major isomer:** 7.51~7.44 (m, 4H, ArH), 7.33~7.29 (m, 2H, ArH), 7.21~7.14 (m, 3H, ArH), 7.10~7.07 (m, 1H, ArH), 6.85~6.83 (m, 2H, ArH), 6.29 (d, *J*

= 8.4Hz, 1H, ArH), 5.18 (d, *J* = 7.6Hz, 1H, CH), 5.10~5.08 (m, 1H, CH), 4.67 (d, *J* = 16.0Hz, 1H, CH), 4.36~4.26 (m, 2H, CH), 3.99 (d, *J* = 15.6Hz, 1H, CH), 3.94 (s, 1H, NH), 3.80 (s, 3H, OCH<sub>3</sub>), 3.63 (s, 3H, OCH<sub>3</sub>), 2.42 (d, *J* = 16.8Hz, 1H, CH<sub>2</sub>), 2.12 (d, *J* = 17.2Hz, 1H, CH<sub>2</sub>), 1.30~1.26 (m, 3H, CH<sub>3</sub>); **Minor isomer:** 7.03~7.00 (m, 1H, ArH), 6.98~6.97 (m, 2H, ArH), 6.18 (d, *J* = 8.0Hz, 1H, ArH), 5.04 (d, *J* = 7.2Hz, 1H, CH), 4.80 (d, *J* = 15.6Hz, 1H, CH), 3.84 (d, *J* = 16.4Hz, 1H, CH), 3.71 (s, 3H, OCH<sub>3</sub>), 3.34 (brs, 2H, CH), 3.10 (s, 3H, OCH<sub>3</sub>), **ratio of major/minor = 91:9**; <sup>13</sup>C NMR (100 MHz, CDCl<sub>3</sub>) δ: 195.9, 173.6, 172.6, 172.3, 171.4, 140.6, 136.7, 134.6, 133.1, 129.3, 128.8, 128.5, 128.4, 128.2, 127.7, 127.5, 126.7, 126.5, 110.0, 73.2, 62.8, 61.4, 60.2, 54.1, 52.6, 51.9, 43.9, 39.9, 14.2; IR(KBr) ν: 3368, 1721, 1206cm<sup>-1</sup>; MS (*m/z*): HRMS (ESI) Calcd. for C<sub>33</sub>H<sub>32</sub>ClN<sub>2</sub>O<sub>8</sub> ([M+H]<sup>+</sup>): 619.1847, found: 619.1844.

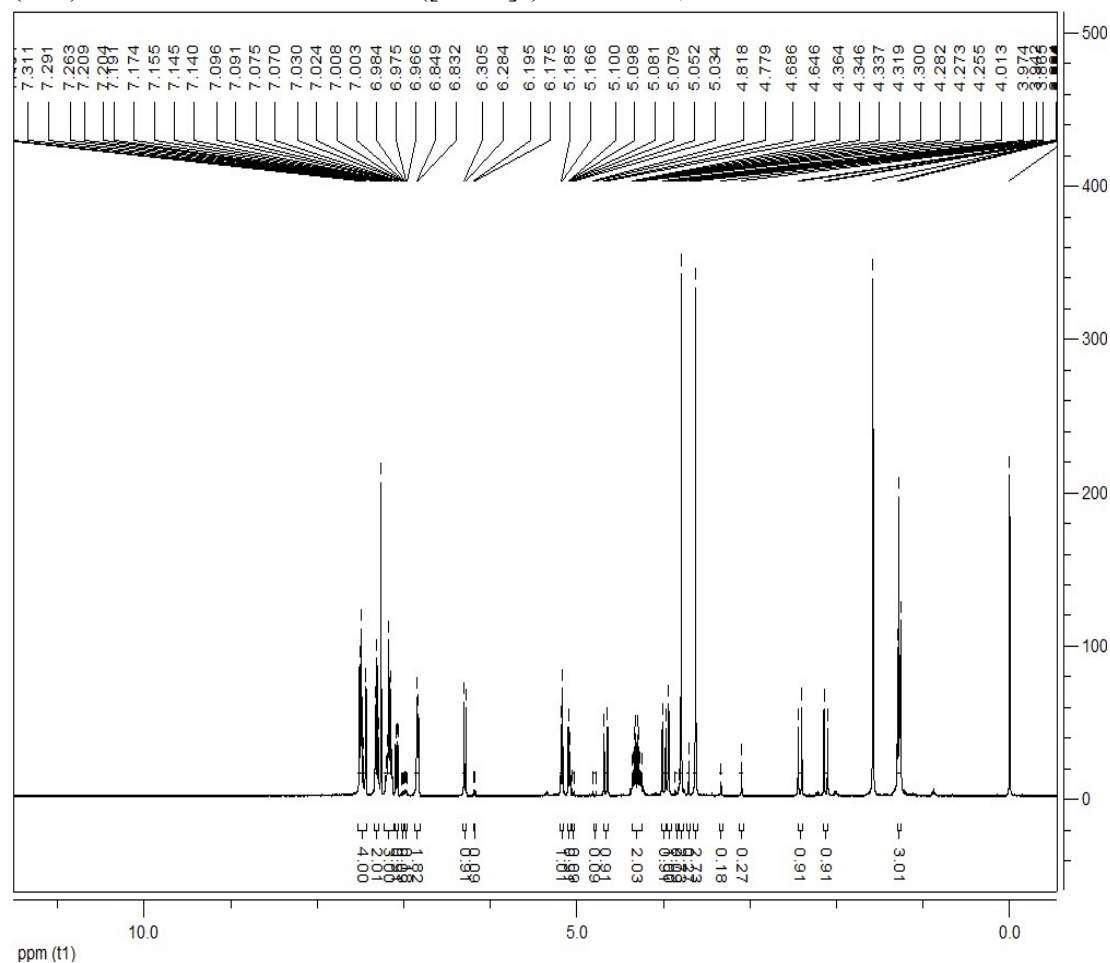



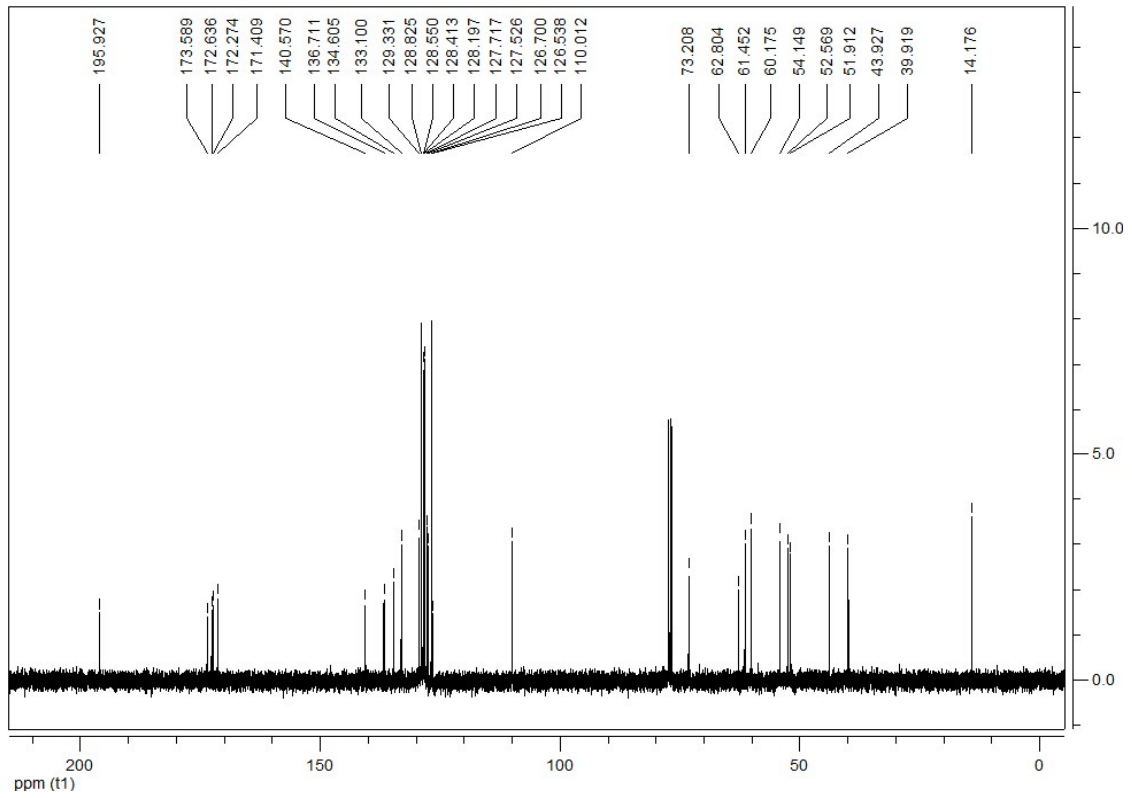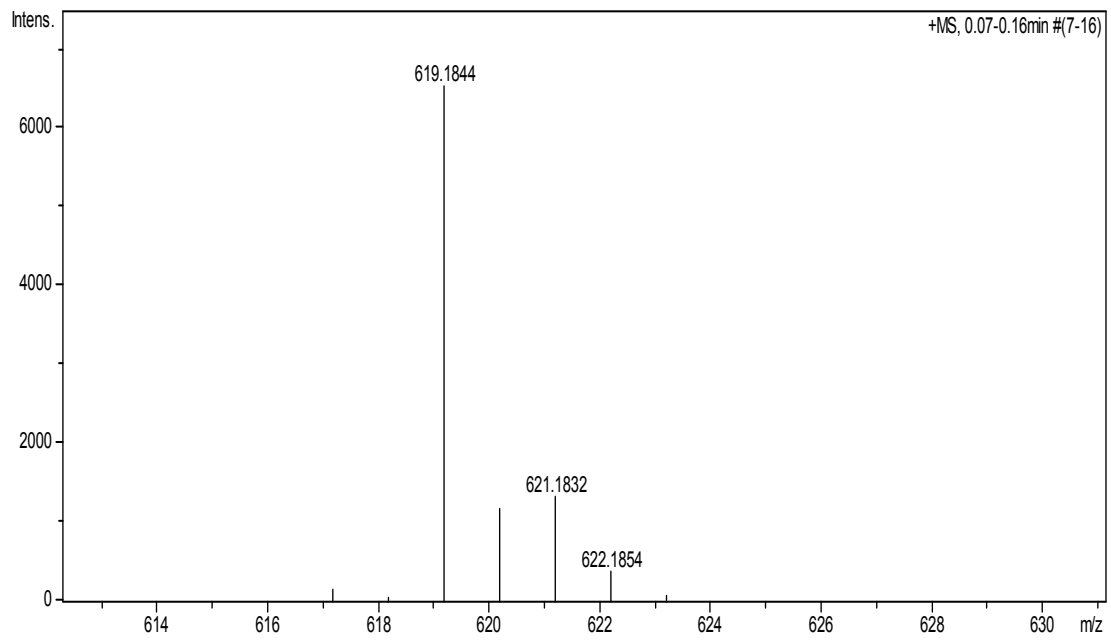

(1m, 1m') Ratio of major/minor = 67:33

5'-ethyl-2'-methyl-(2'R,3S,4'R,5'R)-1-benzyl-4'-(4-chlorobenzoyl)-2'-(2-methoxy-2-oxoethyl)-5-methyl-2-oxospiro[indoline-3,3'-pyrrolidine]-2',5'-dicarboxylate

(1m) Major isomer:

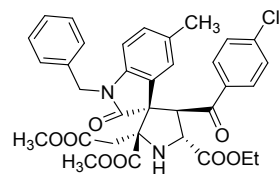

viscous oil, 50%;  $^1\text{H}$  NMR (400 MHz,  $\text{CDCl}_3$ )  $\delta$ : 7.43 (d,  $J = 8.0\text{Hz}$ , 2H, ArH), 7.24~7.17 (m, 6H, ArH), 6.93~6.88 (m, 3H, ArH), 6.33 (d,  $J = 7.6\text{Hz}$ , 1H, ArH), 5.10 (s, 2H, CH), 4.78 (d,  $J = 15.6\text{Hz}$ , 1H, CH), 4.36~4.25 (m, 2H, CH), 4.13 (d,  $J = 15.6\text{Hz}$ , 1H, CH), 3.93 (s, 1H, NH), 3.78 (s, 3H,  $\text{OCH}_3$ ), 3.62 (s, 3H,  $\text{OCH}_3$ ), 2.40 (d,  $J = 17.6\text{Hz}$ , 1H,  $\text{CH}_2$ ), 2.32 (s, 3H,  $\text{CH}_3$ ), 2.12 (d,  $J = 16.4\text{Hz}$ , 1H,  $\text{CH}_2$ ), 1.28 (t,  $J = 6.8\text{Hz}$ , 3H,  $\text{CH}_3$ );  $^{13}\text{C}$  NMR (100 MHz,  $\text{CDCl}_3$ )  $\delta$ : 195.0, 174.0, 172.8, 172.4, 171.7, 139.6, 139.4, 135.0, 132.8, 129.9, 129.8, 128.7, 128.4, 127.9, 127.6, 126.8, 124.4, 110.0, 108.9, 73.4, 62.8, 61.5, 60.4, 54.0, 52.5, 51.8, 43.9, 40.0, 21.2, 14.2; IR(KBr)  $\nu$ : 3374, 1741, 1712,  $1204\text{cm}^{-1}$ ; MS ( $m/z$ ): HRMS (ESI) Calcd. for  $\text{C}_{34}\text{H}_{34}\text{ClN}_2\text{O}_8$  ( $[\text{M}+\text{H}]^+$ ): 633.2004, found: 633.2024.

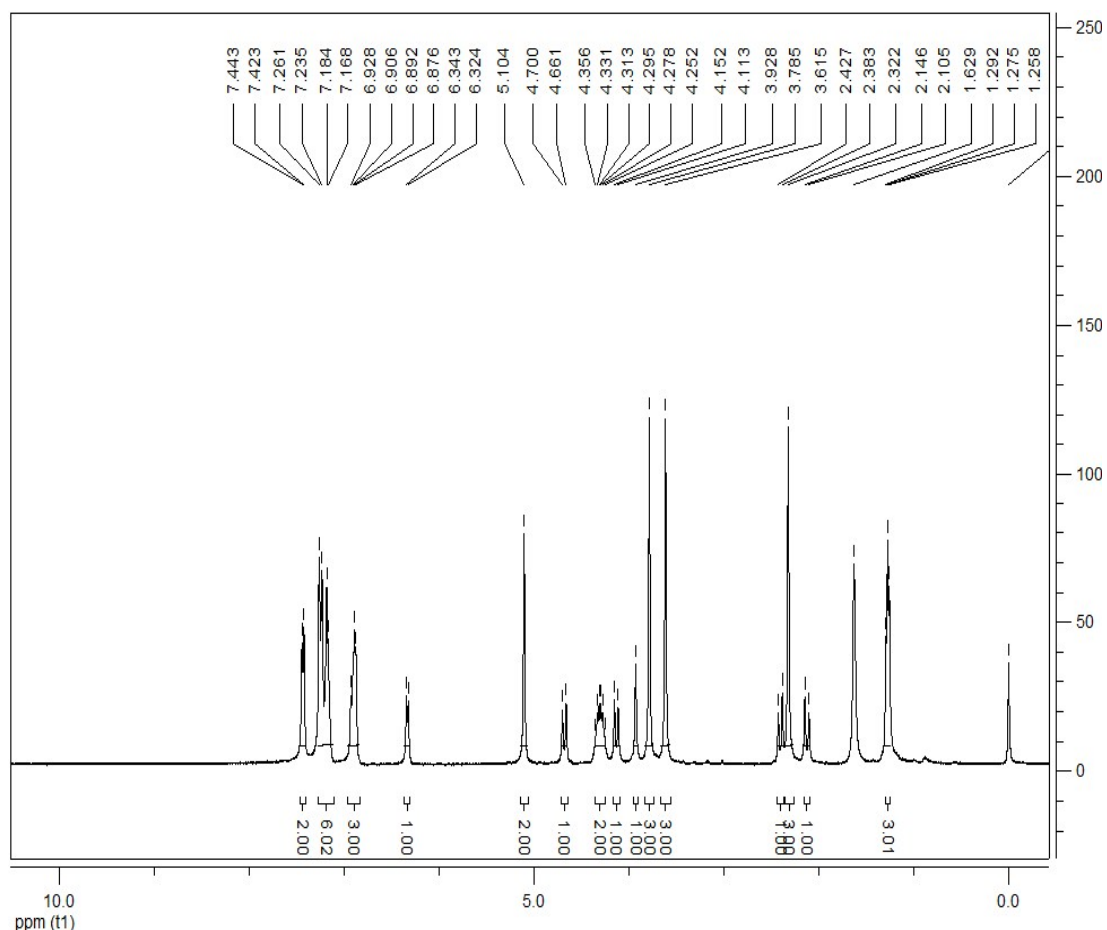

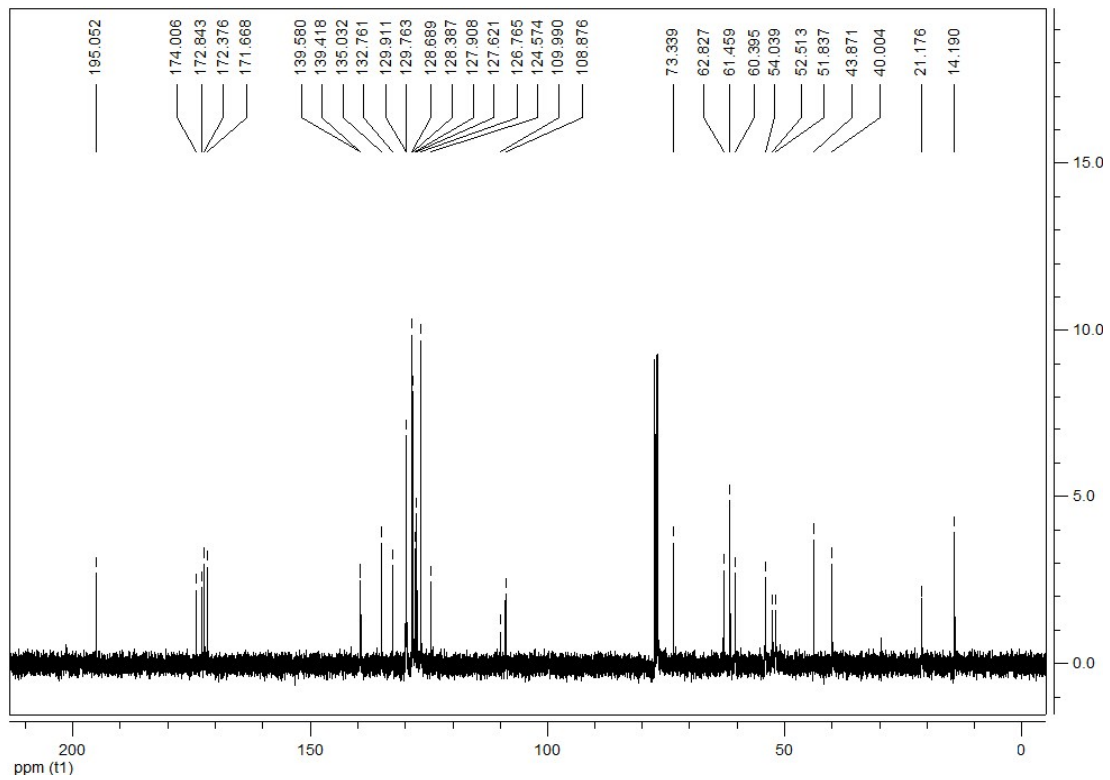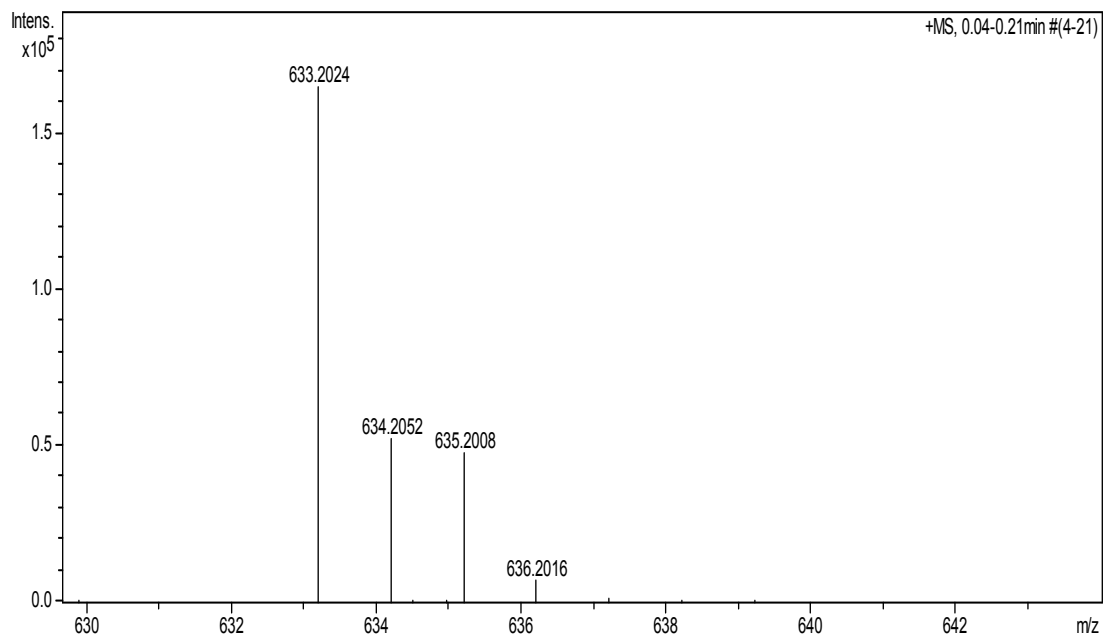

**5'-ethyl-2'-methyl-(2'S,3S,4'R,5'R)-1-benzyl-4'-(4-chlorobenzoyl)-2'-(2-methoxy-2-oxoethyl)-5-methyl-2-oxospiro[indoline-3,3'-pyrrolidine]-2',5'-dicarboxylate (1m')** Minor isomer:

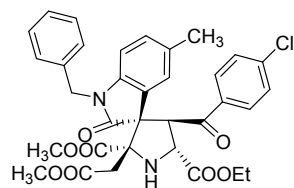

white solid, 25%, m.p. 169~170°C; <sup>1</sup>H NMR (400 MHz, CDCl<sub>3</sub>) δ: 7.37 (d, *J* = 8.4Hz, 2H, ArH), 7.26~7.21 (m, 5H, ArH), 7.05~7.02 (m, 3H, ArH), 6.85 (d, *J* = 8.0Hz, 1H, ArH), 6.24 (d, *J* = 8.0Hz, 1H, ArH), 5.17 (t, *J* = 7.6Hz, 1H, CH), 5.00 (d, *J* = 7.6Hz, 1H, CH), 4.80 (d, *J* = 15.6Hz, 1H, CH), 4.24 (q, *J*<sub>1</sub> = 14.2Hz, *J*<sub>2</sub> = 7.2Hz, 2H, CH), 3.98 (d, *J* = 15.6Hz, 1H, CH), 3.82 (d, *J* = 6.8Hz, 1H, NH), 3.70 (s, 3H, OCH<sub>3</sub>), 3.33 (brs, 2H, CH), 3.01 (s, 3H, OCH<sub>3</sub>), 2.29 (s, 3H, CH<sub>3</sub>), 1.27 (t, *J* = 6.8Hz, 3H, CH<sub>3</sub>); <sup>13</sup>C NMR (100 MHz, CDCl<sub>3</sub>) δ: 194.5, 173.7, 173.3, 171.2, 170.3, 139.4, 135.1, 135.0, 132.1, 129.8, 129.5, 128.6, 128.4, 127.6, 127.4, 127.0, 124.6, 108.1, 74.9, 61.7, 61.7, 59.0, 56.9, 52.1, 51.8, 43.9, 40.2, 21.1, 14.1; IR(KBr) ν: 3355, 1747, 1694, 1201cm<sup>-1</sup>; MS (*m/z*): HRMS (ESI) Calcd. for C<sub>34</sub>H<sub>34</sub>ClN<sub>2</sub>O<sub>8</sub> ([M+H]<sup>+</sup>): 633.2004, found: 633.2032.

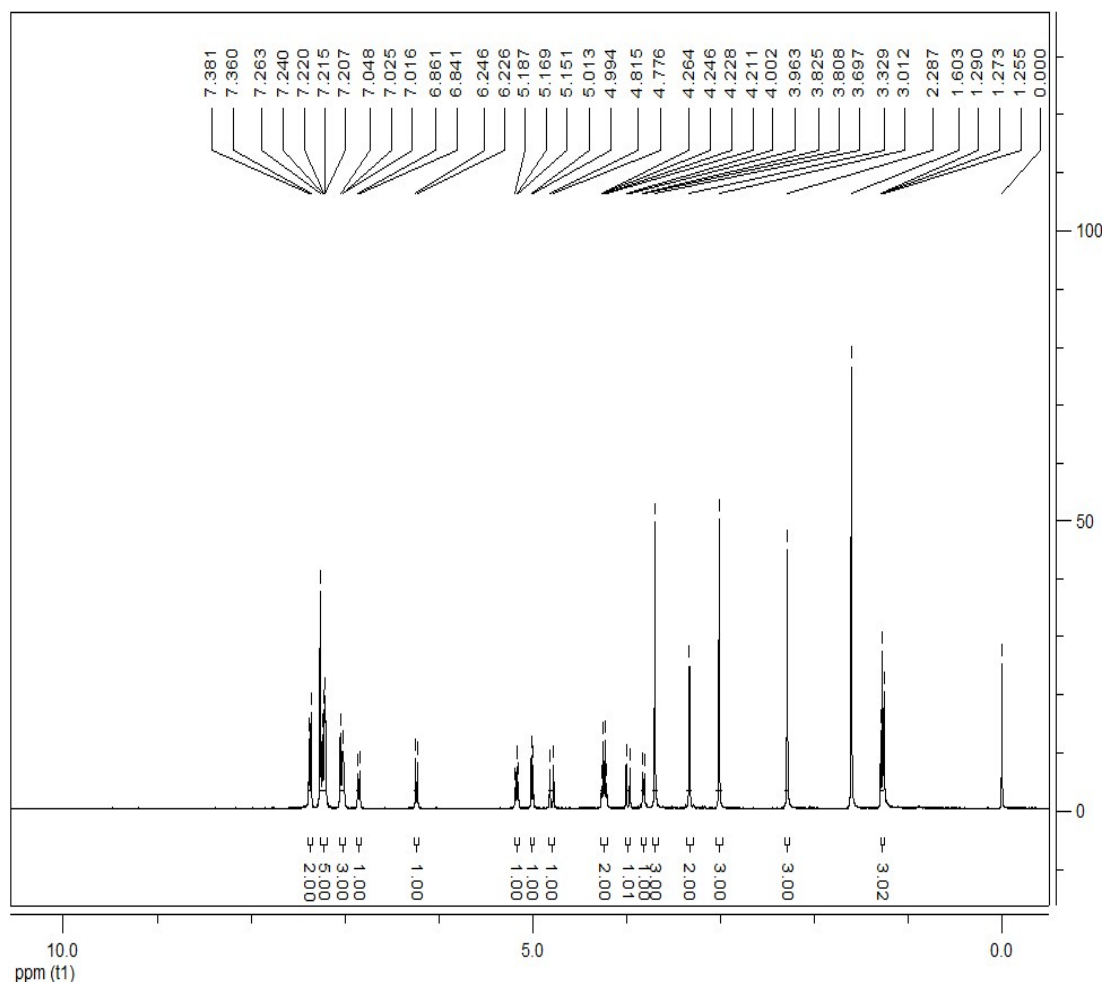

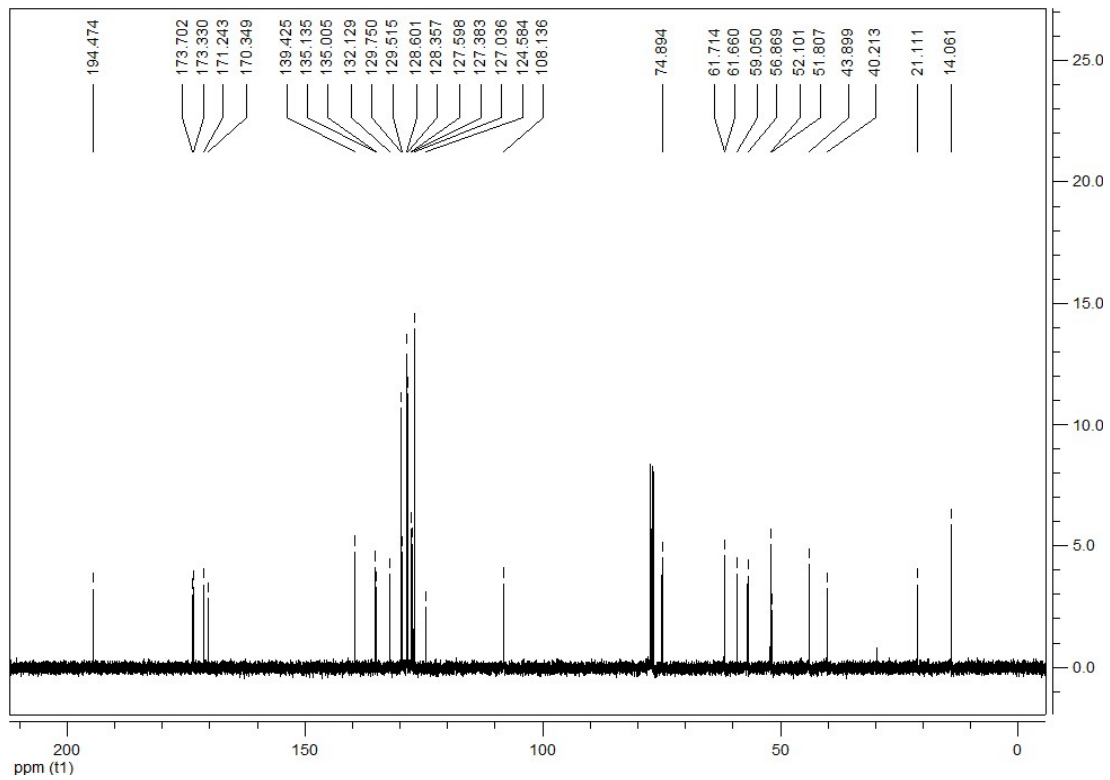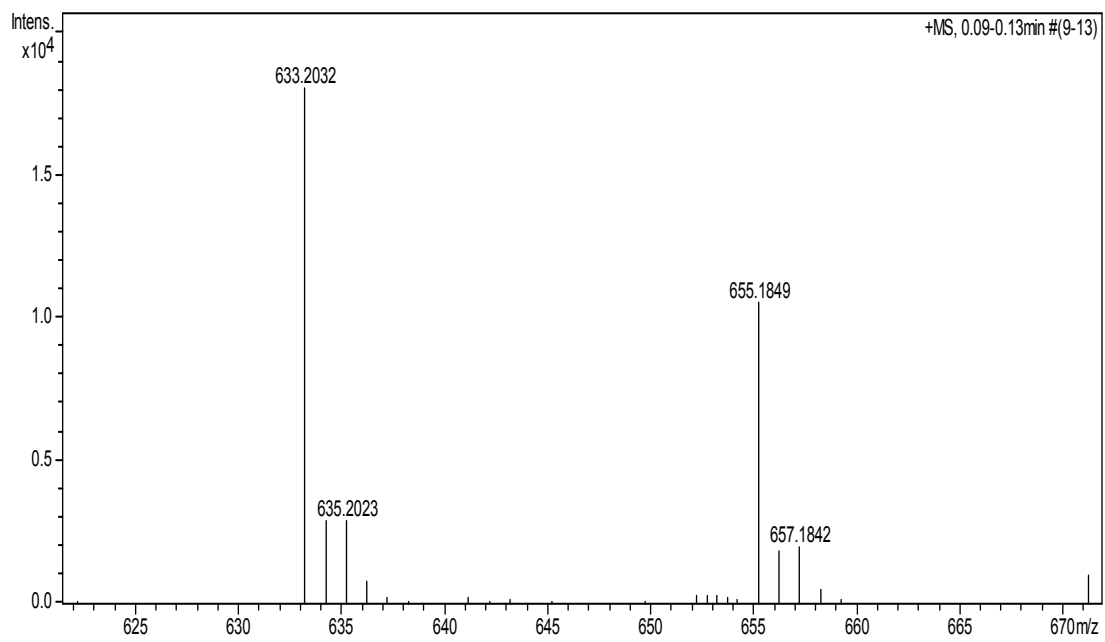

**5'-ethyl-2'-methyl-(2'R,3S,4'R,5'R)-1-benzyl-2'-(2-methoxy-2-oxoethyl)-5-methyl-4'-(4-methylbenzoyl)-2-oxospiro[indoline-3,3'-pyrrolidine]-2',5'-dicarboxylate (1n)**

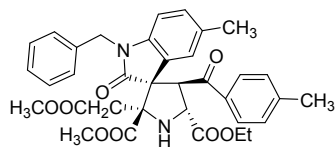

white solid, 71%, m.p. 127~128°C;  $^1\text{H}$  NMR (400 MHz,  $\text{CDCl}_3$ )  $\delta$ : 7.42 (d,  $J = 8.0\text{Hz}$ , 2H, ArH), 7.25 (brs, 1H, ArH), 7.17~7.07 (m, 5H, ArH), 6.89 (d,  $J = 7.6\text{Hz}$ , 1H, ArH), 6.83 (d,  $J = 7.2\text{Hz}$ , 1H, ArH), 6.27 (d,  $J = 7.6\text{Hz}$ , 1H, ArH), 5.15~5.11 (m, 2H, CH), 4.63 (d,  $J = 15.6\text{Hz}$ , 1H, CH), 4.35~4.23 (m, 2H, CH), 4.11 (d,  $J = 15.6\text{Hz}$ , 1H, CH), 3.94 (s, 1H, NH), 3.79 (s, 3H,  $\text{OCH}_3$ ), 3.61 (s, 3H,  $\text{OCH}_3$ ), 2.41 (d,  $J = 16.8\text{Hz}$ , 1H,  $\text{CH}_2$ ), 2.35 (s, 3H,  $\text{CH}_3$ ), 2.32 (s, 3H,  $\text{CH}_3$ ), 2.16 (d,  $J = 16.8\text{Hz}$ , 1H,  $\text{CH}_2$ ), 1.68 (t,  $J = 7.2\text{Hz}$ , 3H,  $\text{CH}_3$ );  $^{13}\text{C}$  NMR (100 MHz,  $\text{CDCl}_3$ )  $\delta$ : 194.6, 173.1, 171.9, 171.5, 170.7, 142.7, 138.6, 134.2, 133.3, 131.6, 128.6, 127.8, 127.6, 127.6, 127.0, 126.4, 125.7, 123.8, 107.8, 72.4, 62.0, 60.3, 59.5, 52.9, 51.5, 50.8, 42.8, 39.1, 20.6, 20.2, 13.2; IR(KBr)  $\nu$ : 3382, 1741, 1206 $\text{cm}^{-1}$ ; MS ( $m/z$ ): HRMS (ESI) Calcd. for  $\text{C}_{35}\text{H}_{37}\text{N}_2\text{O}_8$  ( $[\text{M}+\text{H}]^+$ ): 613.2550, found: 613.2572.

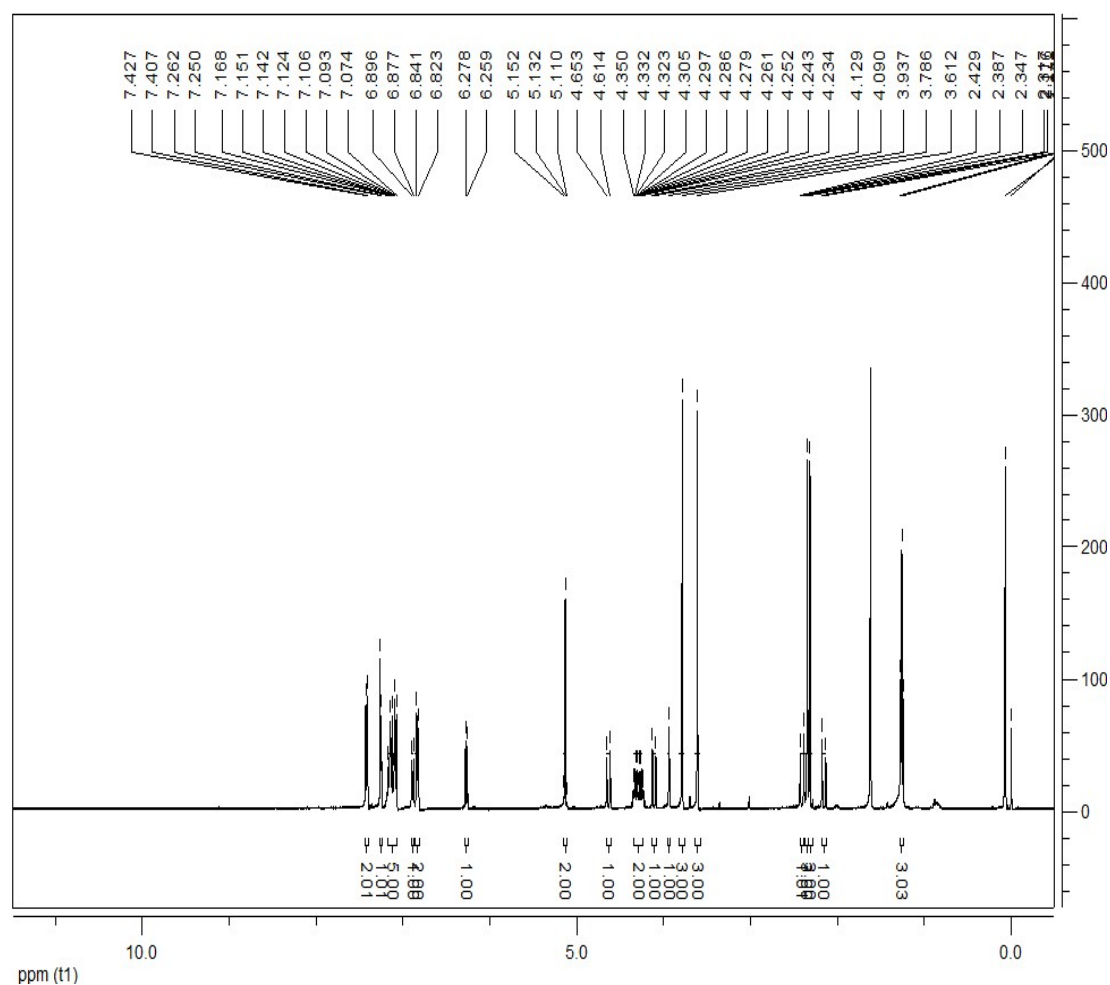

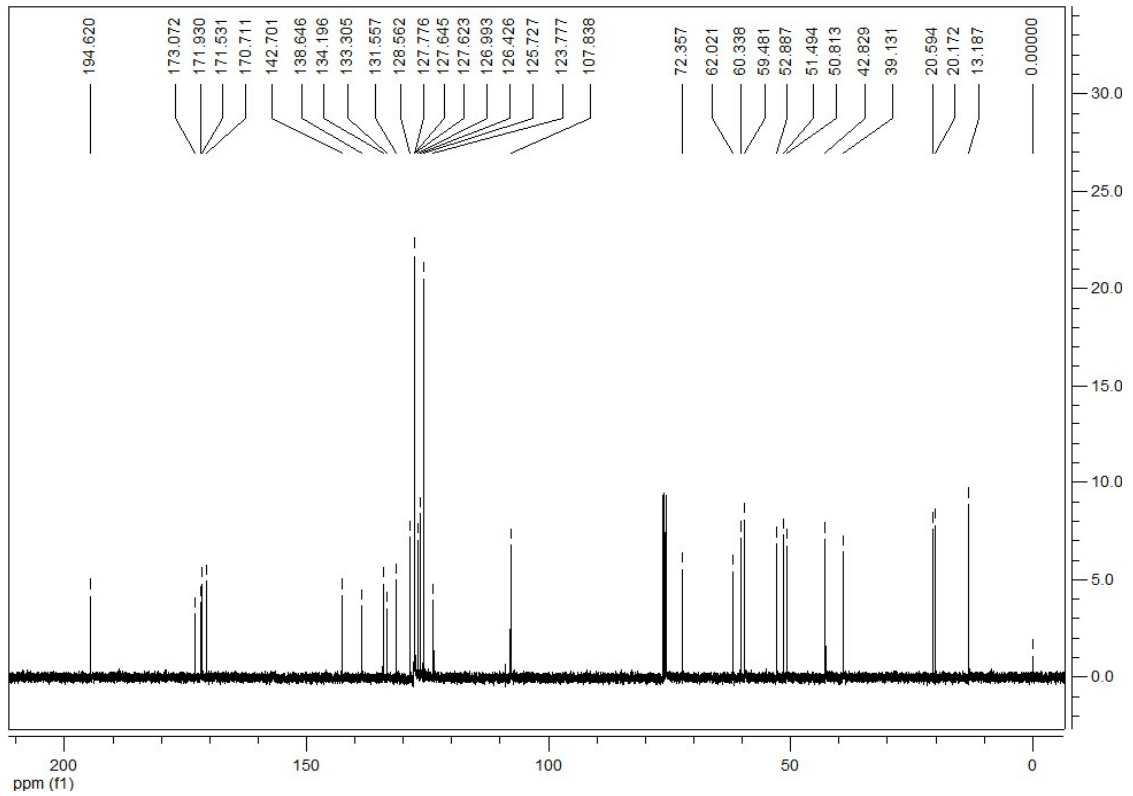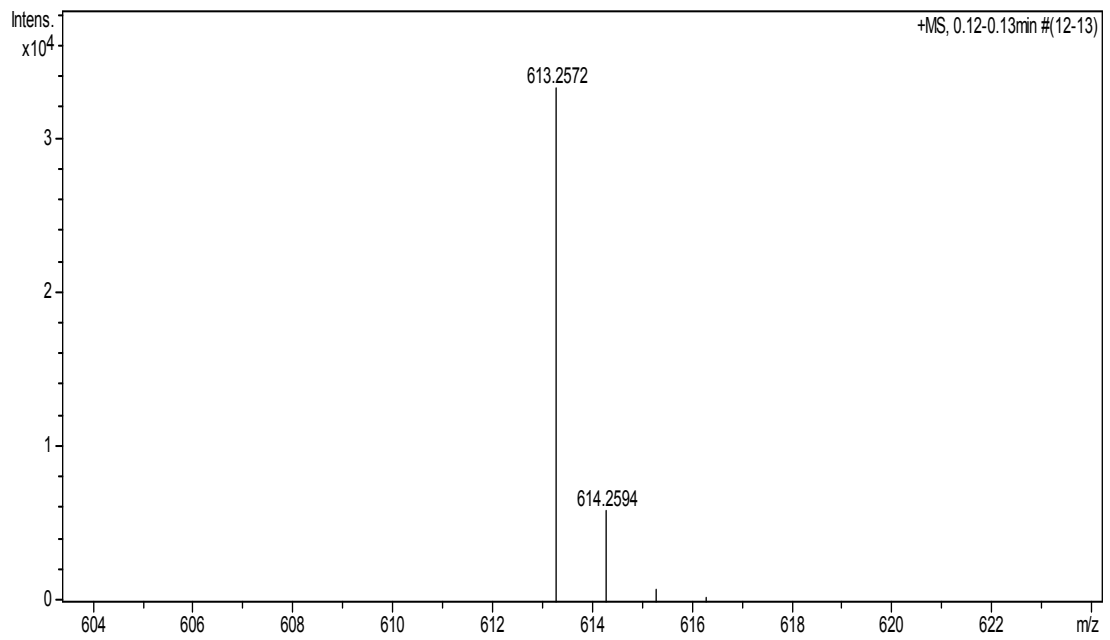





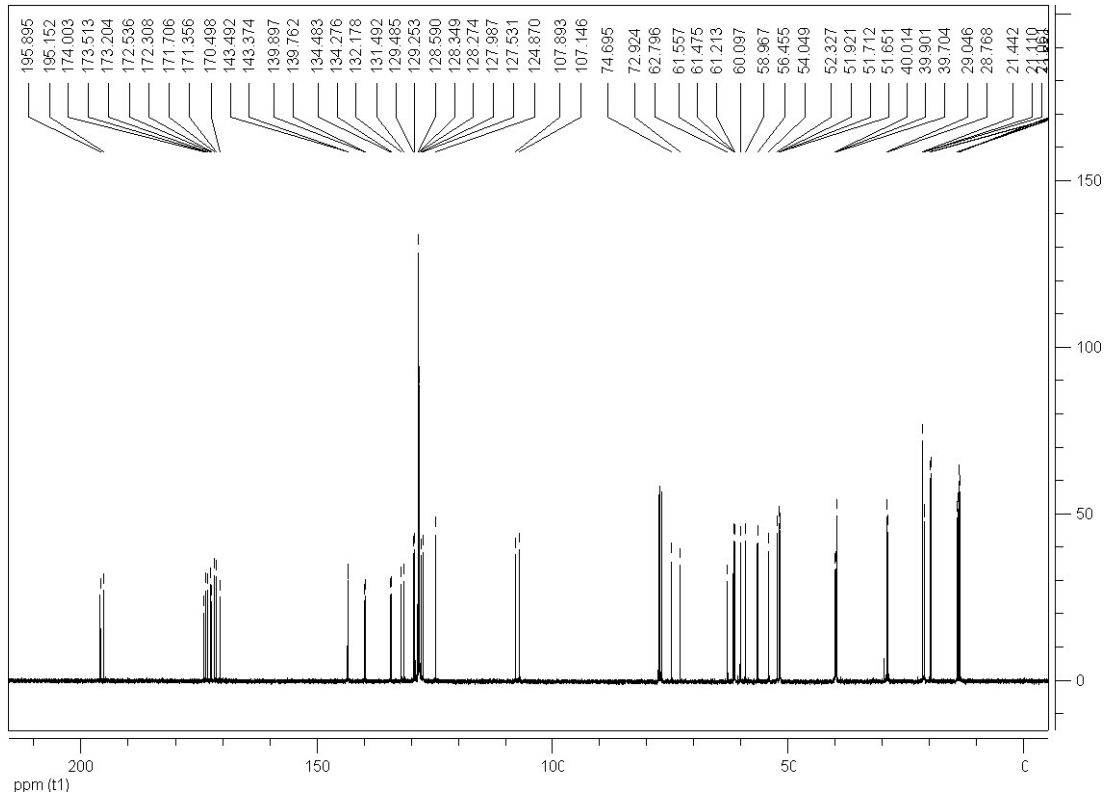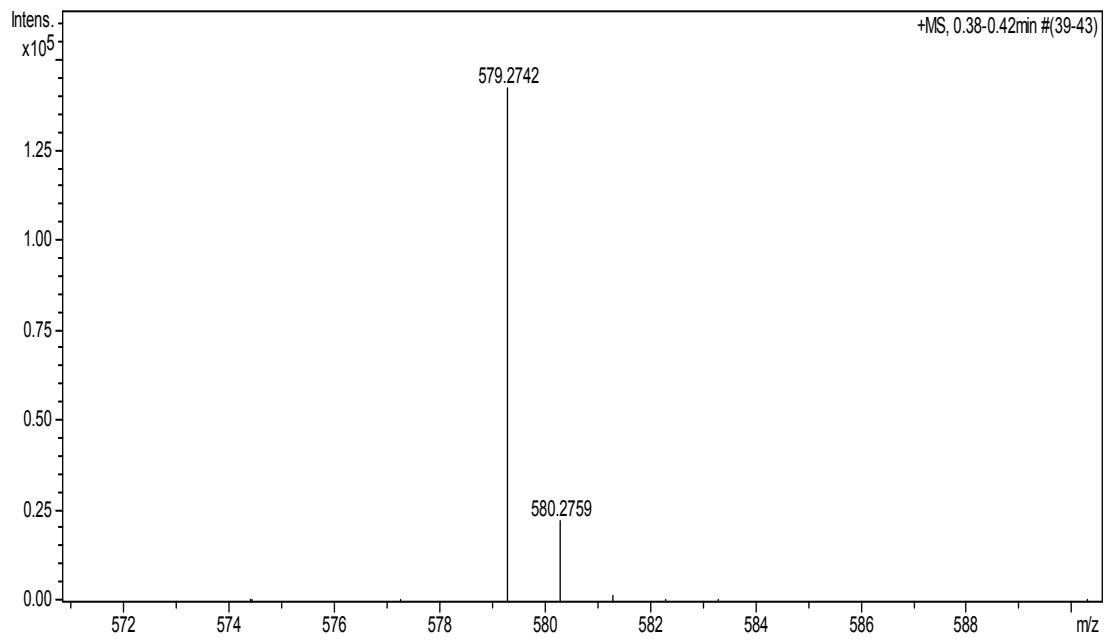

**5'-ethyl-2'-methyl-(2'R,3S,4'R,5'R)-1-butyl-5-chloro-4'-(4-chlorobenzoyl)-2'-(2-methoxy-2-oxoethyl)-2-oxospiro[indoline-3,3'-pyrrolidine]-2',5'-dicarboxylate (1p)**

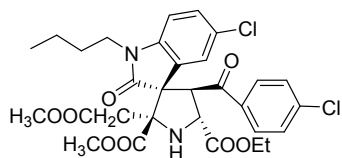

white solid, 66%, m.p. 117~119°C; <sup>1</sup>H NMR (400 MHz, CDCl<sub>3</sub>) δ: 7.37 (d, *J* = 8.0Hz, 2H, ArH), 7.29 (brs, 1H, ArH), 7.24 (d, *J* = 8.4Hz, 2H, ArH), 7.15 (d, *J* = 8.4Hz, 1H, ArH), 6.41 (d, *J* = 8.0Hz, 1H, ArH), 5.12~5.09 (m, 1H, CH), 4.92 (d, *J* = 7.6Hz, 1H, CH), 4.25~4.20 (m, 2H, CH), 3.72 (d, *J* = 5.6Hz, 1H, NH), 3.69 (s, 3H, OCH<sub>3</sub>), 3.41~3.38 (m, 1H, CH), 3.24 (brs, 2H, CH), 3.22 (s, 3H, OCH<sub>3</sub>), 3.13~3.08 (m, 1H, CH), 1.26 (t, *J* = 7.2Hz, 3H, CH<sub>3</sub>), 1.22~1.18 (m, 4H, CH), 0.87 (t, *J* = 6.8Hz, 3H, CH<sub>3</sub>); <sup>13</sup>C NMR (100 MHz, CDCl<sub>3</sub>) δ: 194.2, 173.3, 172.9, 171.1, 170.4, 140.8, 139.6, 134.8, 129.7, 129.2, 128.4, 127.6, 127.2, 126.5, 108.5, 74.6, 61.8, 61.4, 58.7, 56.2, 52.2, 51.8, 40.0, 39.9, 29.0, 19.9, 14.0, 13.6; IR(KBr) ν: 3350, 1751, 1697, 1191cm<sup>-1</sup>; MS (*m/z*): HRMS (ESI) Calcd. for C<sub>30</sub>H<sub>33</sub>Cl<sub>2</sub>N<sub>2</sub>O<sub>8</sub> ([M+H]<sup>+</sup>): 619.1614, found: 619.1637.

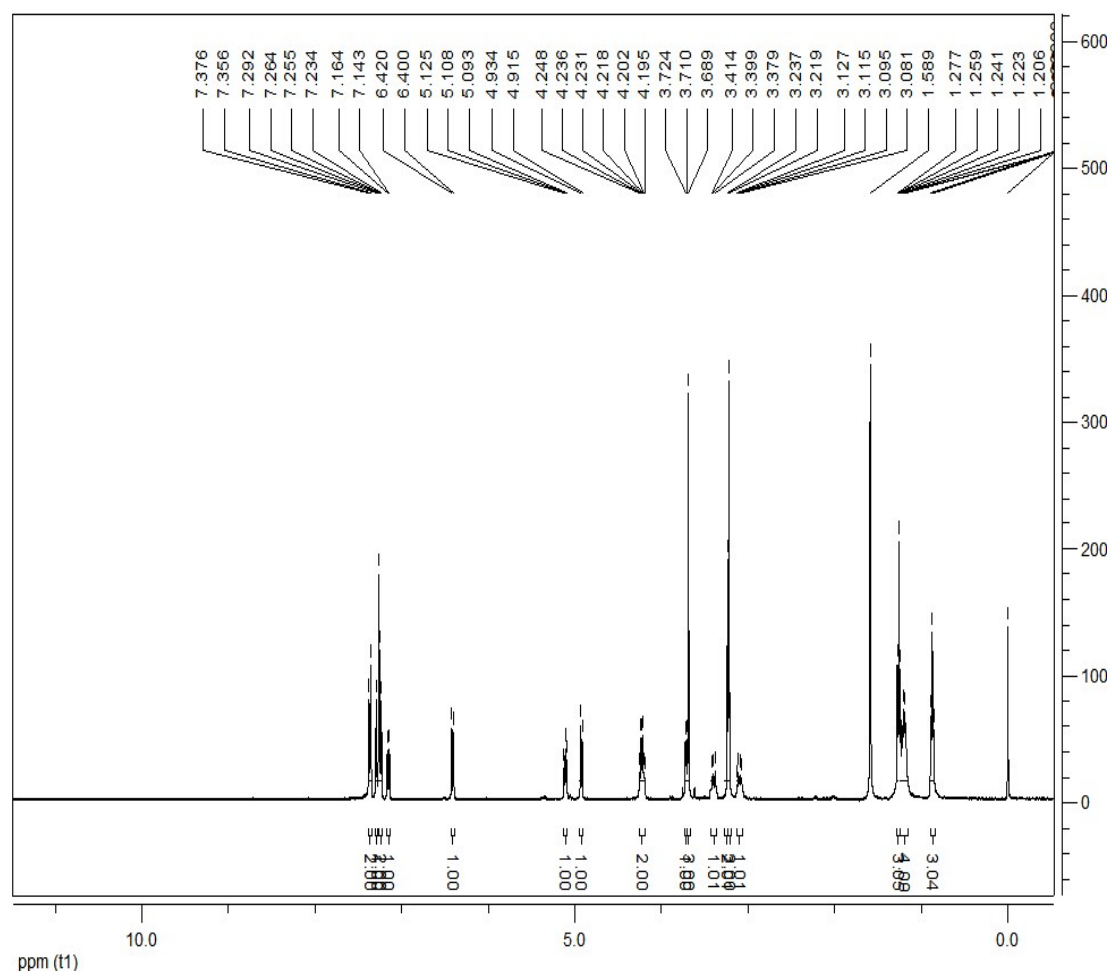

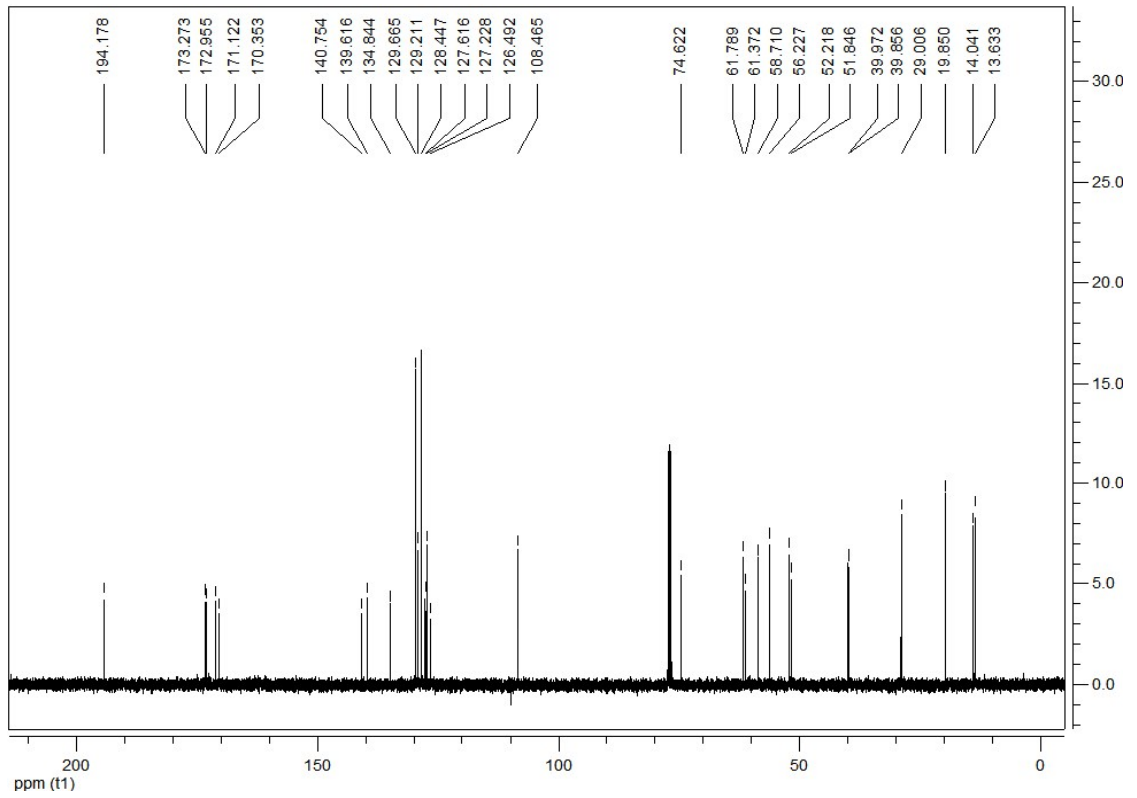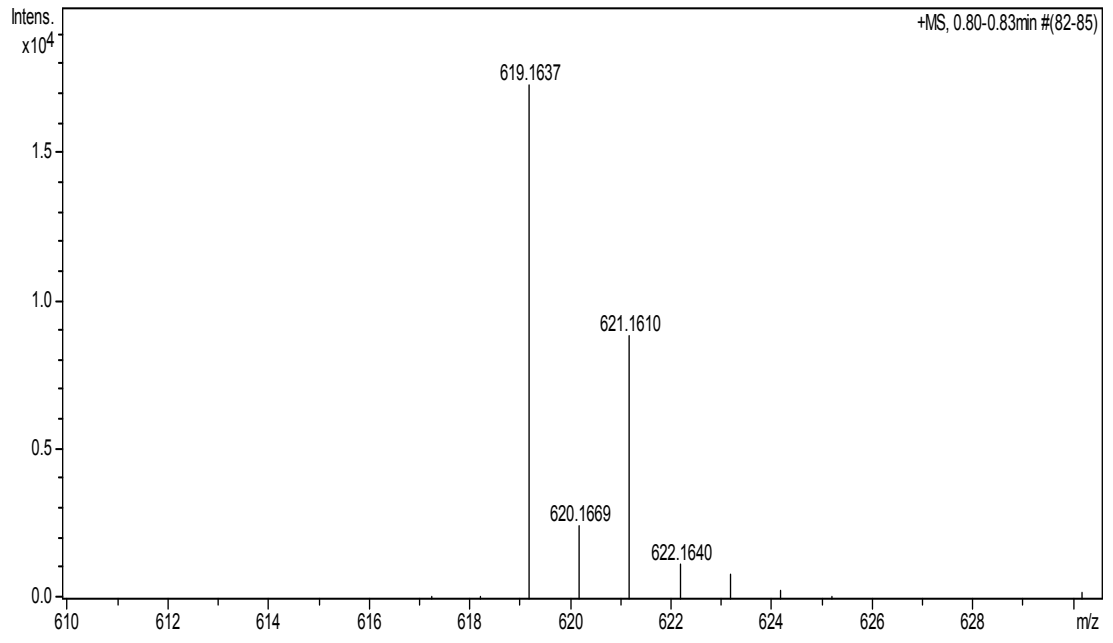



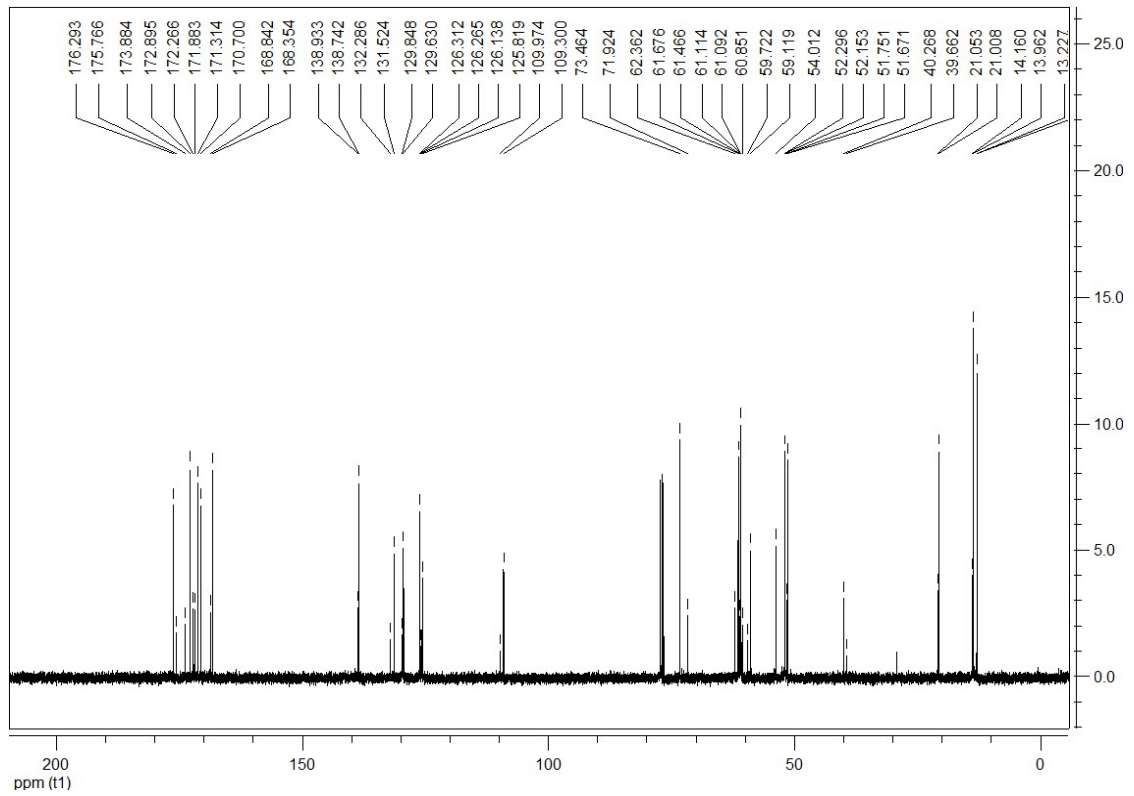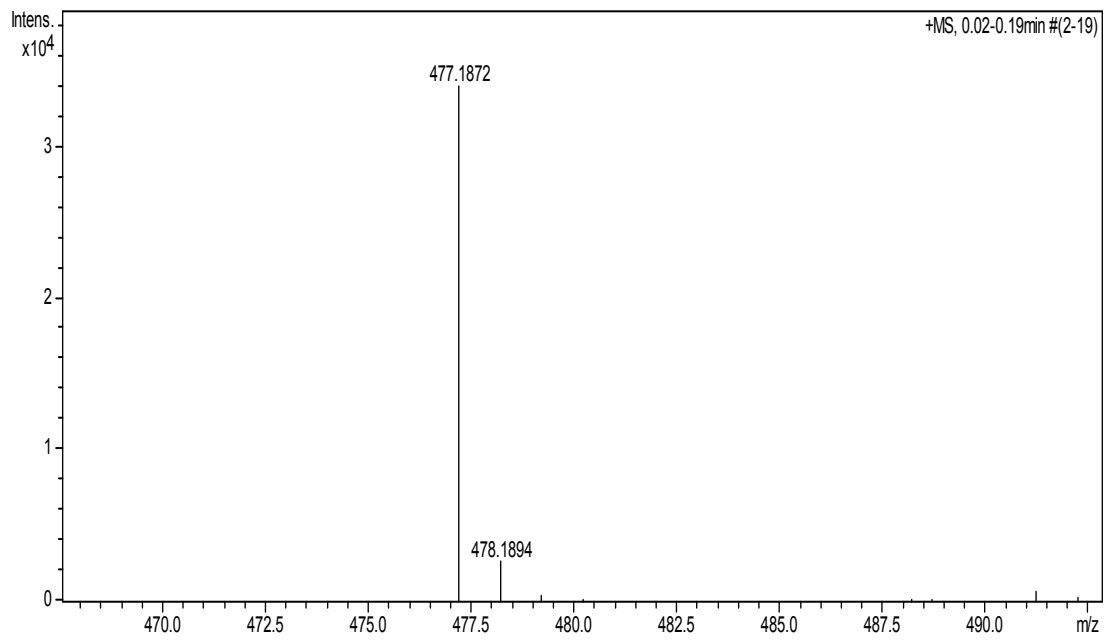

**4',5'-diethyl-2'-methyl-(3S,4'R,5'R)-5-fluoro-2'-(2-methoxy-2-oxoethyl)-2-oxospiro[indoline-3,3'-pyrrolidine]-2',4',5'-tricarboxylate (1r)**

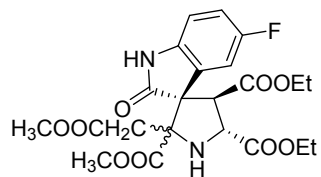

viscous oil, 68%;  $^1\text{H}$  NMR (400 MHz,  $\text{CDCl}_3$ )  $\delta$ : **Major isomer:** 8.37 (brs, 1H, NH), 7.06~7.04 (m, 1H, ArH), 6.97~6.92 (m, 1H, ArH), 6.80~6.77 (m, 1H, ArH), 4.70~4.67 (m, 1H, CH), 4.25 (q,  $J = 7.2\text{Hz}$ , 2H, CH), 4.17 (d,  $J = 8.4\text{Hz}$ , 1H, CH), 3.91~3.69 (m, 3H, 2CH, NH), 3.67 (s, 3H,  $\text{OCH}_3$ ), 3.30 (s, 3H,  $\text{OCH}_3$ ), 3.26 (d,  $J = 16.8\text{Hz}$ , 1H,  $\text{CH}_2$ ), 3.13 (d,  $J = 16.4\text{Hz}$ , 1H,  $\text{CH}_2$ ), 1.31 (t,  $J = 7.2\text{Hz}$ , 3H,  $\text{CH}_3$ ), 0.81~0.76 (m, 3H,  $\text{CH}_3$ ); **Minor isomer:** 7.15~7.13 (m, 1H, ArH), 7.02~6.98 (m, 1H, ArH), 6.87~6.84 (m, 1H, ArH), 4.37~4.31 (m, 2H, CH), 4.15~4.10 (m, 1H, CH), 3.71 (s, 3H,  $\text{OCH}_3$ ), 3.61 (s, 3H,  $\text{OCH}_3$ ), 2.61 (d,  $J = 17.2\text{Hz}$ , 1H,  $\text{CH}_2$ ), 2.11 (d,  $J = 17.2\text{Hz}$ , 1H,  $\text{CH}_2$ ), 1.36 (t,  $J = 7.2\text{Hz}$ , 3H,  $\text{CH}_3$ ), **ratio of major/minor = 70:30**;  $^{13}\text{C}$  NMR (100 MHz,  $\text{CDCl}_3$ )  $\delta$ : 176.1, 175.6, 173.5, 172.9, 172.1, 171.7, 171.2, 170.7, 168.6, 168.1, 158.9 (d,  $J = 240.8\text{Hz}$ ), 158.4 (d,  $J = 240.1\text{ Hz}$ ), 137.3 (d,  $J = 2.1\text{ Hz}$ ), 137.2 (d,  $J = 2.1\text{Hz}$ ), 128.0, 127.9, 127.8, 115.8 (d,  $J = 23.5\text{ Hz}$ ), 113.5 (d,  $J = 8.3\text{ Hz}$ ), 113.4 (d,  $J = 8.0\text{ Hz}$ ), 110.8 (d,  $J = 7.9\text{ Hz}$ ), 110.1 (d,  $J = 8.0\text{ Hz}$ ), 73.4, 71.9, 62.6, 61.9, 61.6, 61.4, 61.3, 61.1, 58.9, 58.7, 54.0, 53.9, 52.4, 52.3, 51.9, 51.7, 40.0, 14.1, 13.9, 13.4, 13.4; IR(KBr)  $\nu$ : 3360, 1740, 1197  $\text{cm}^{-1}$ ; MS ( $m/z$ ): HRMS (ESI) Calcd. for  $\text{C}_{22}\text{H}_{25}\text{FN}_2\text{O}_9$  ( $[\text{M}+\text{H}]^+$ ): 503.1442, found: 503.1443.

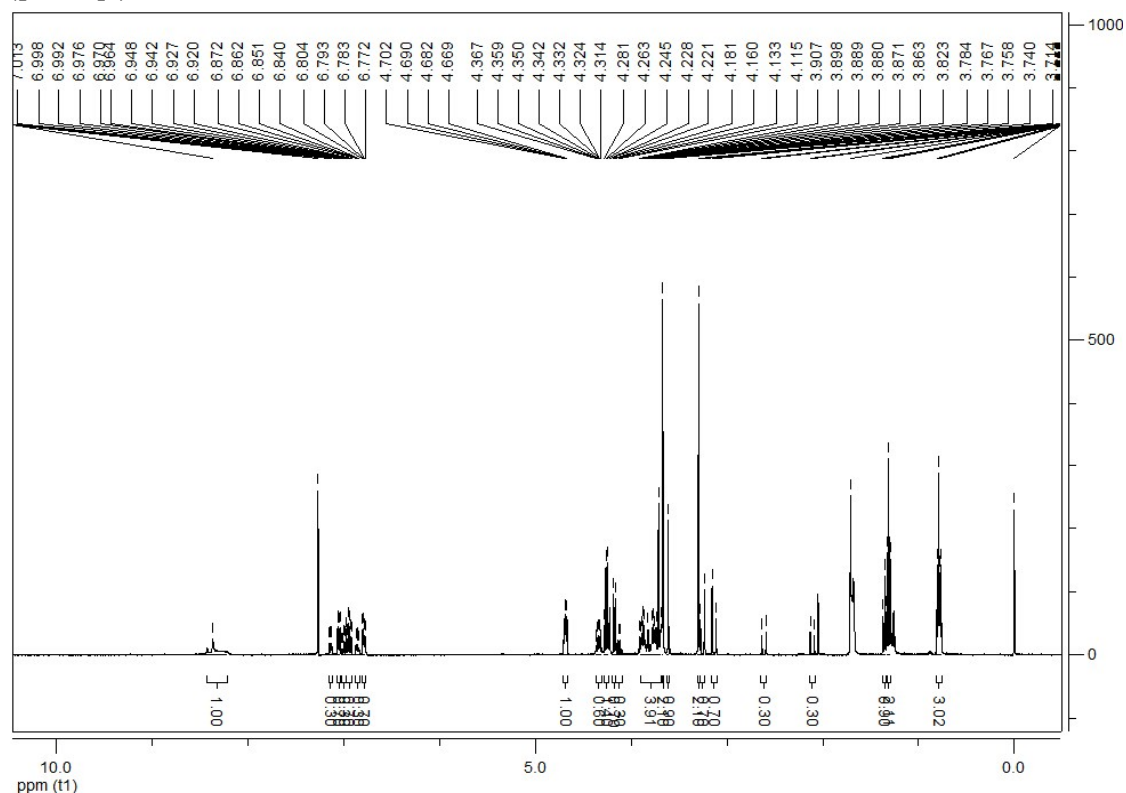

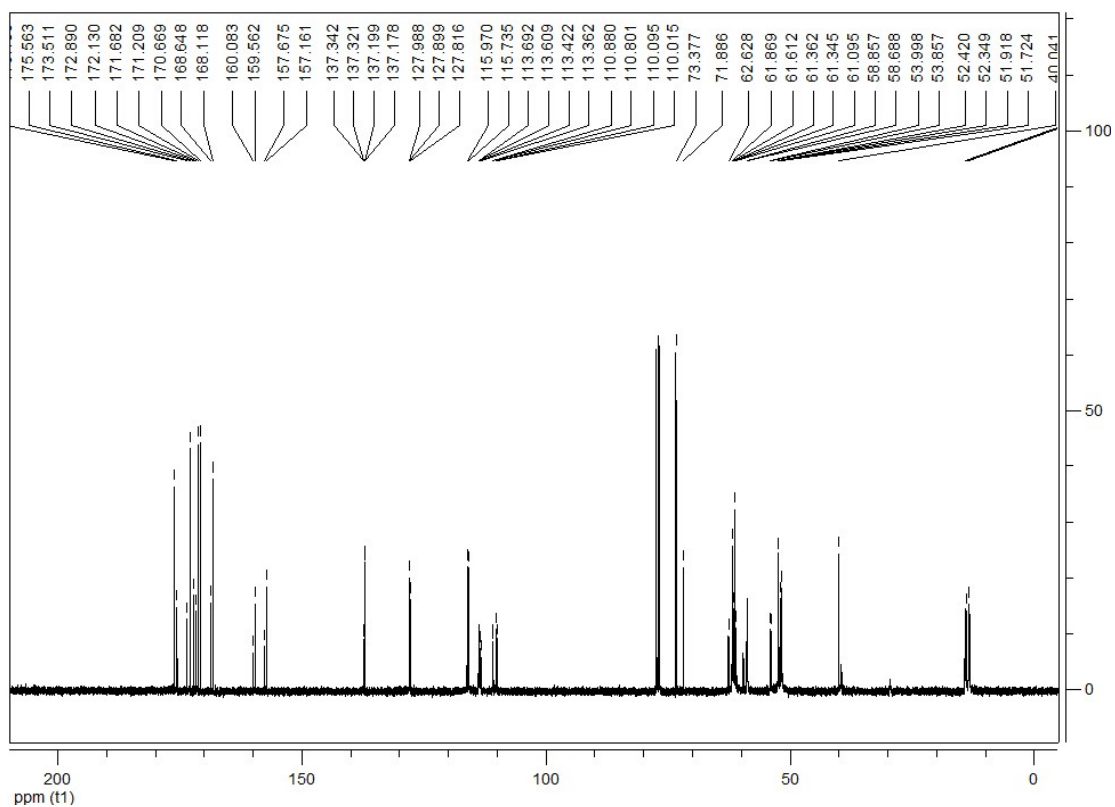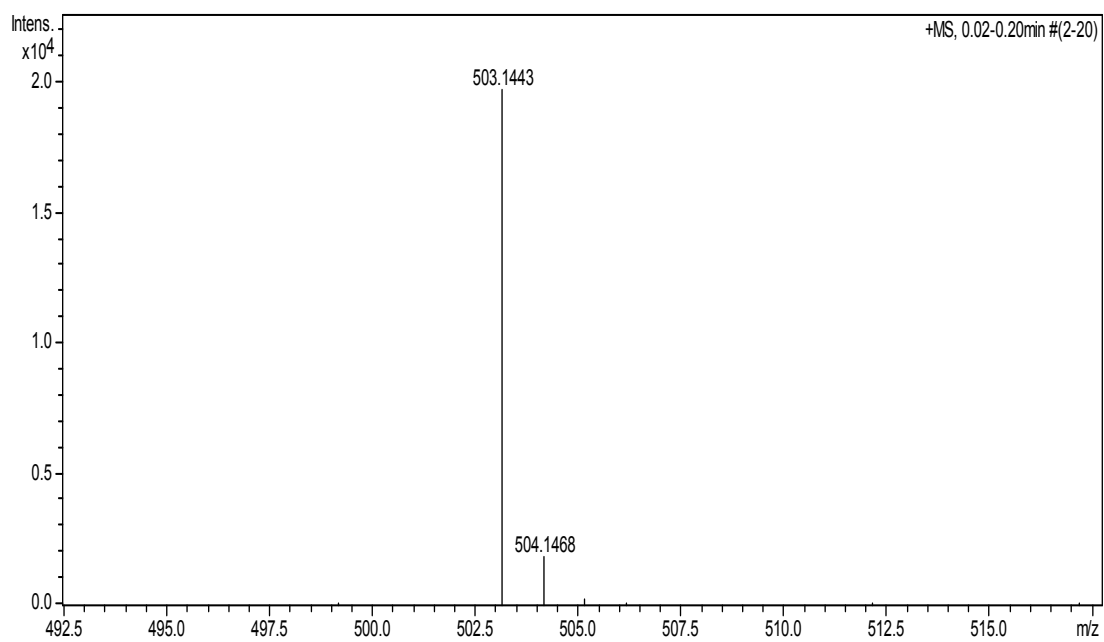

**4',5'-diethyl-2'-methyl-(2'R,3S,4'R,5'R)-1-benzyl-5-chloro-2'-(2-methoxy-2-oxoethyl)-2-oxospiro[indoline-3,3'-pyrrolidine]-2',4',5'-tricarboxylate (1s)**

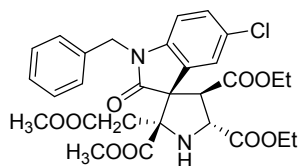

white solid, 57%, m.p. 134~135°C; <sup>1</sup>H NMR (400 MHz, CDCl<sub>3</sub>) δ: 7.40~7.29 (m, 6H, ArH), 7.15 (d, *J* = 8.4Hz, 1H, ArH), 6.62 (d, *J* = 8.4Hz, 1H, ArH), 5.12 (d, *J* = 15.6Hz, 1H, CH), 4.73~4.68 (m, 2H, CH), 4.29~4.24 (m, 3H, CH), 3.86~3.82 (m, 1H, CH), 3.71 (d, *J* = 6.0Hz, 1H, NH), 3.67 (s, 3H, OCH<sub>3</sub>), 3.64~3.62 (m, 1H, CH), 3.27 (d, *J* = 16.4Hz, 1H, CH<sub>2</sub>), 3.21 (d, *J* = 16.4Hz, 1H, CH<sub>2</sub>), 3.13 (s, 3H, OCH<sub>3</sub>), 1.32 (t, *J* = 7.2Hz, 3H, CH<sub>3</sub>), 0.63 (t, *J* = 7.2Hz, 3H, CH<sub>3</sub>); <sup>13</sup>C NMR (100 MHz, CDCl<sub>3</sub>) δ: 173.5, 172.8, 171.2, 170.5, 168.0, 141.5, 135.2, 129.2, 128.8, 127.9, 127.7, 127.6, 125.5, 109.3, 73.5, 61.8, 61.2, 60.3, 58.9, 54.1, 52.3, 51.8, 44.4, 40.2, 14.0, 13.4; IR(KBr) ν: 3353, 1748, 1705, 1187cm<sup>-1</sup>; MS (*m/z*): HRMS (ESI) Calcd. for C<sub>29</sub>H<sub>32</sub>ClN<sub>2</sub>O<sub>9</sub> ([M+H]<sup>+</sup>): 587.1796, found: 587.1776.

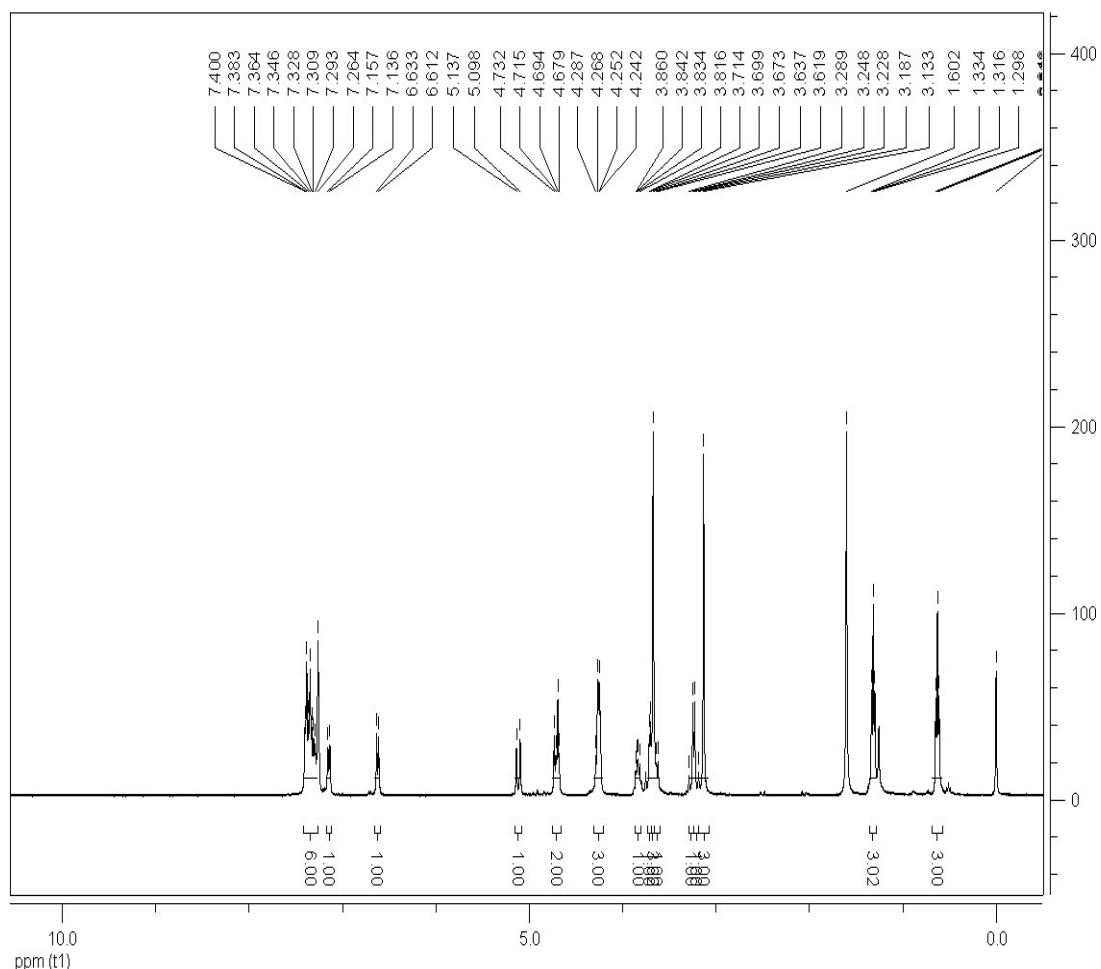



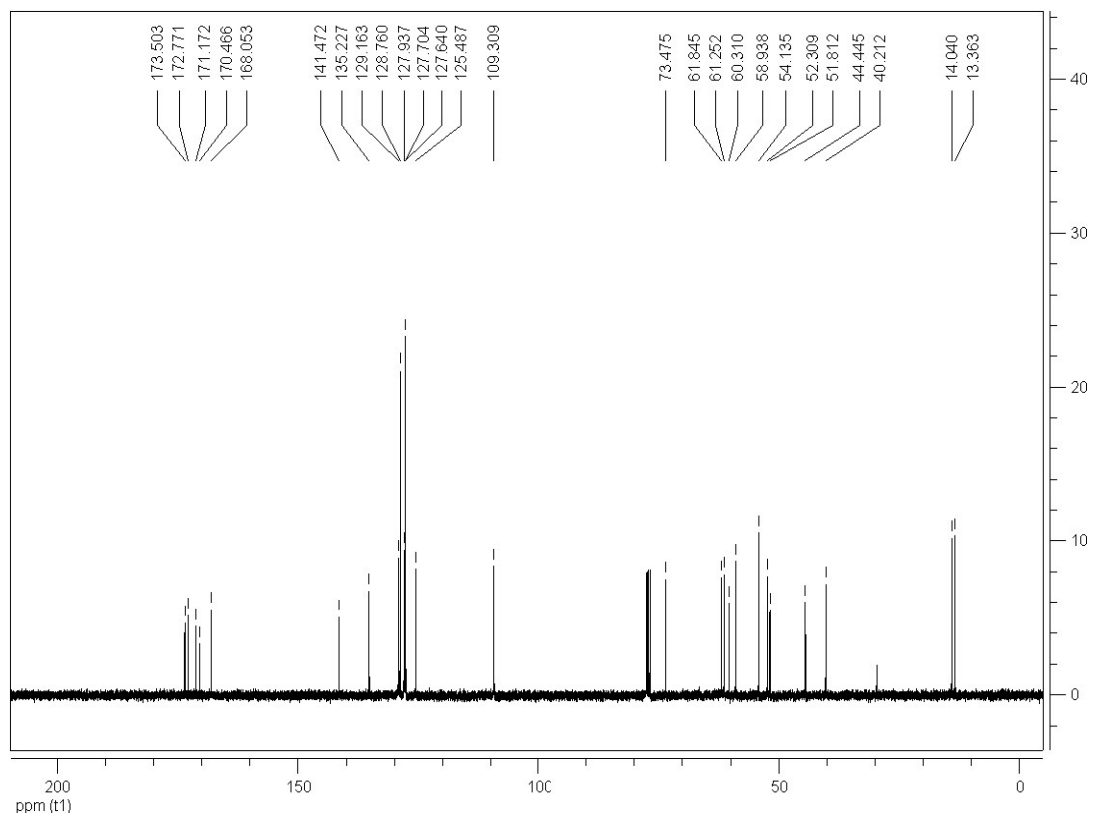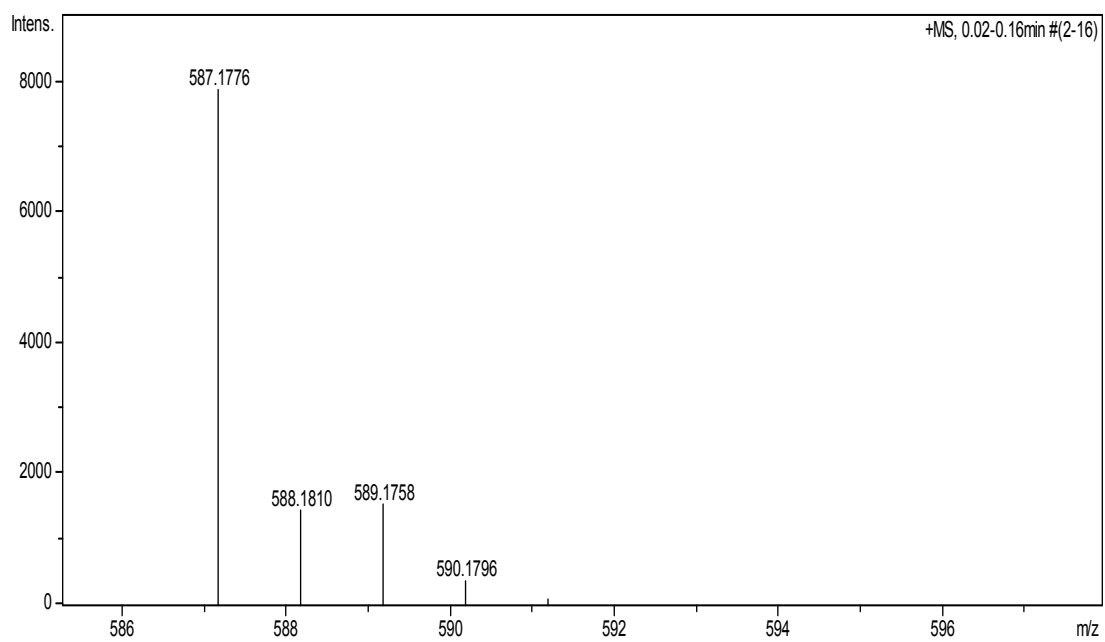

**4',5'-diethyl-2'-methyl-(3*S*,4'*R*,5'*R*)-1-benzyl-2'-(2-methoxy-2-oxoethyl)-5-methyl-2-oxospiro[indoline-3,3'-pyrrolidine]-2',4',5'-tricarboxylate (1t)**

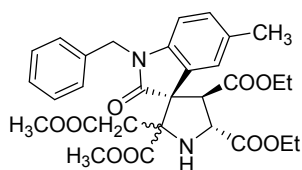

viscous oil, 75%;  $^1\text{H}$  NMR (400 MHz,  $\text{CDCl}_3$ )  $\delta$ : **Major isomer:** 7.42~7.28 (m, 5H, ArH), 7.02~6.99 (m, 1H, ArH), 6.95 (d,  $J = 8.0\text{Hz}$ , 1H, ArH), 6.60 (d,  $J = 8.0\text{Hz}$ , 1H, ArH), 5.13 (d,  $J = 15.2\text{Hz}$ , 1H, CH), 4.75~4.72 (m, 1H, CH), 4.68 (d,  $J = 15.6\text{Hz}$ , 1H, CH), 4.38~4.30 (m, 1H, CH), 4.29~4.23 (m, 2H, CH), 3.84~3.78 (m, 2H, CH), 3.67 (s, 3H,  $\text{OCH}_3$ ), 3.63~3.50 (m, 3H, 2CH, NH), 3.05 (s, 3H,  $\text{OCH}_3$ ), 2.26 (s, 3H,  $\text{CH}_3$ ), 1.37~1.30 (m, 3H,  $\text{CH}_3$ ), 0.57 (t,  $J = 7.2\text{Hz}$ , 3H,  $\text{CH}_3$ ); **Minor isomer:** 7.15 (brs, 1H, ArH), 6.67 (d,  $J = 8.0\text{Hz}$ , 1H, ArH), 4.94 (d,  $J = 15.2\text{Hz}$ , 1H, CH), 4.80 (d,  $J = 15.2\text{Hz}$ , 1H, CH), 3.75 (s, 3H,  $\text{OCH}_3$ ), 3.26 (s, 3H,  $\text{OCH}_3$ ), 2.49 (d,  $J = 17.2\text{Hz}$ , 1H,  $\text{CH}_2$ ), 2.28 (s, 3H,  $\text{CH}_3$ ), 2.08 (d,  $J = 16.8\text{Hz}$ , 1H,  $\text{CH}_2$ ), 0.44 (t,  $J = 7.2\text{Hz}$ , 3H,  $\text{CH}_3$ ), **ratio of major/minor = 63:37**;  $^{13}\text{C}$  NMR (100 MHz,  $\text{CDCl}_3$ )  $\delta$ : 173.8, 173.6, 173.1, 172.8, 172.1, 171.7, 171.2, 170.4, 168.8, 168.3, 140.4, 140.4, 135.8, 135.8, 132.4, 131.7, 129.6, 129.4, 128.6, 128.5, 127.7, 127.7, 127.6, 126.0, 125.9, 125.8, 125.7, 108.8, 108.1, 73.5, 72.3, 61.6, 61.6, 61.3, 60.9, 60.6, 60.4, 59.9, 59.2, 54.2, 52.3, 52.0, 51.7, 51.6, 44.2, 40.4, 39.7, 20.9, 14.2, 14.0, 13.2, 13.1; IR(KBr)  $\nu$ : 3362, 1740, 1197 $\text{cm}^{-1}$ ; MS ( $m/z$ ): HRMS (ESI) Calcd. for  $\text{C}_{30}\text{H}_{35}\text{N}_2\text{O}_9$  ( $[\text{M}+\text{H}]^+$ ): 567.2343, found: 567.2349.

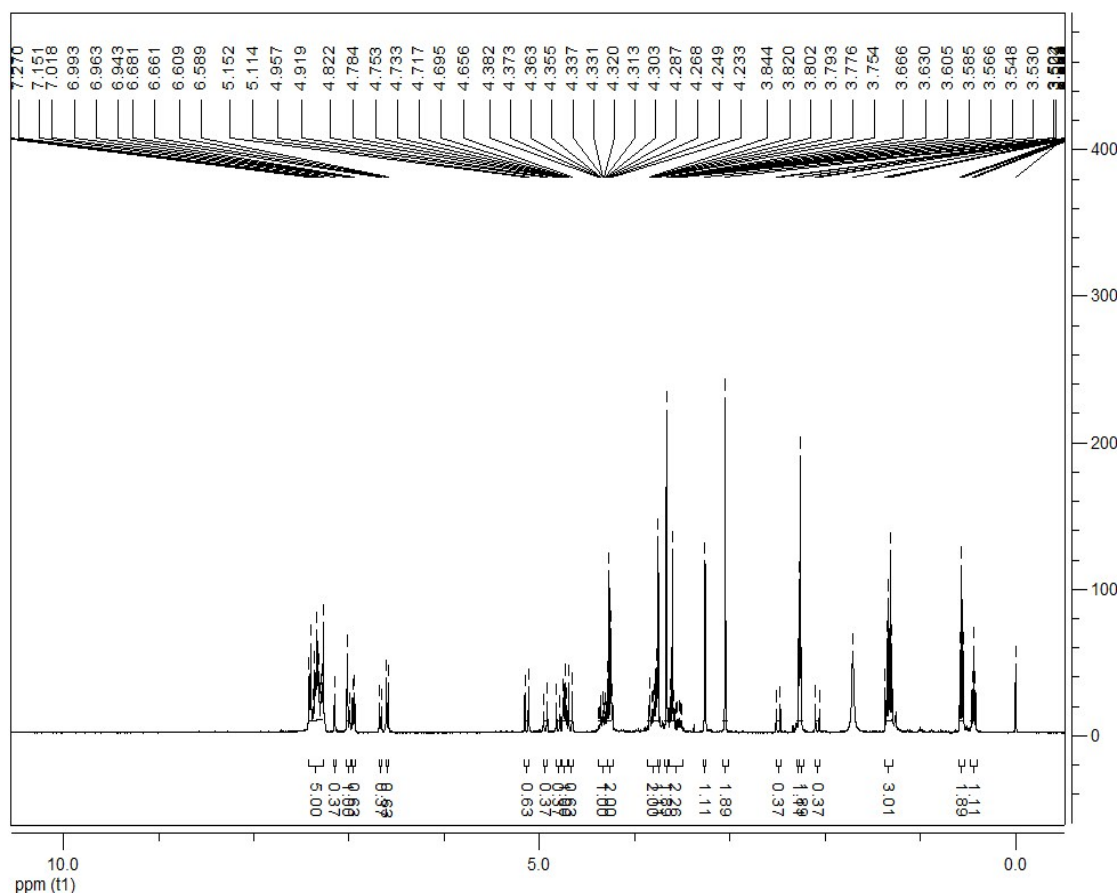

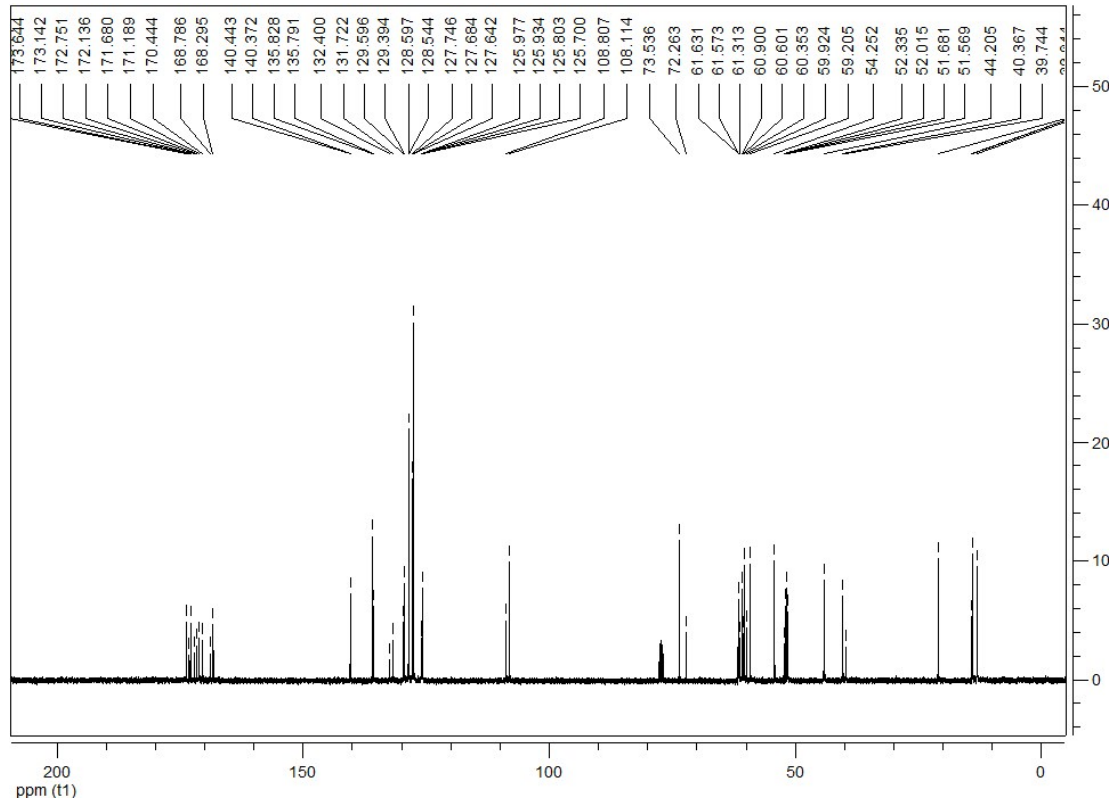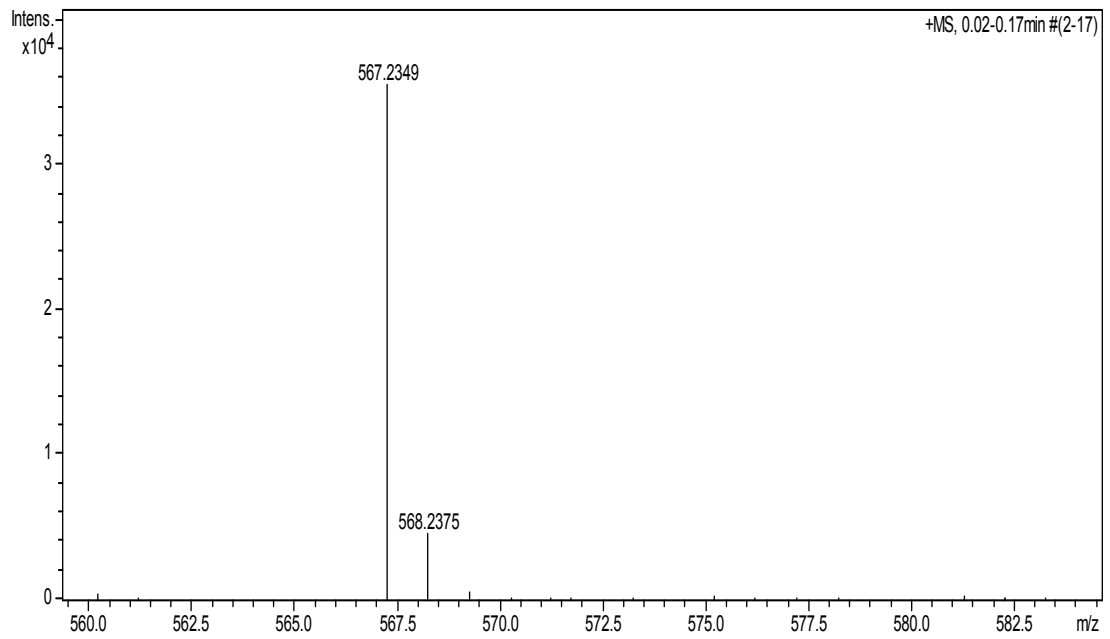



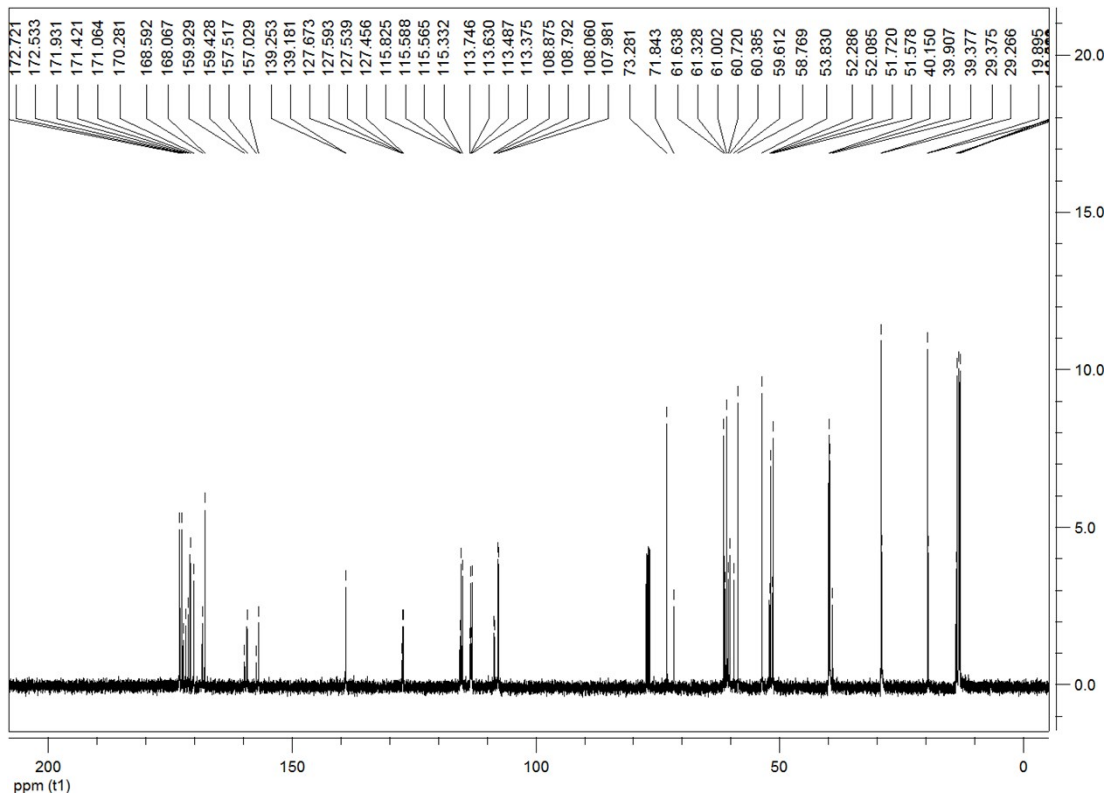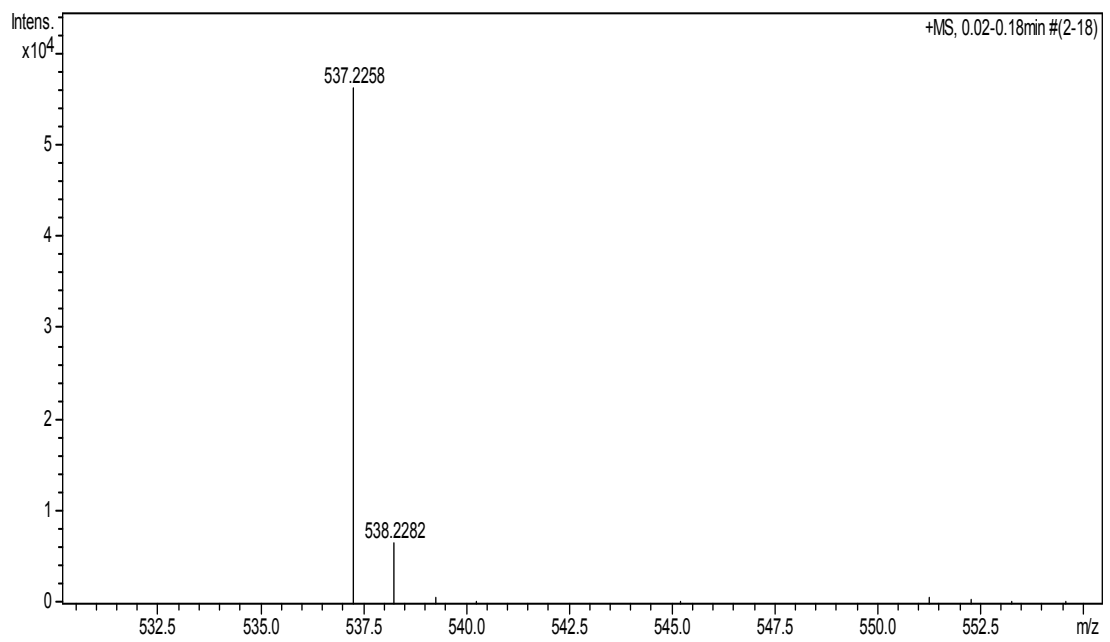

(1v, 1v') Ratio of major/minor = 81:19

**4',5'-diethyl-2'-methyl-(2'R,3S,4'R,5'R)-1-butyl-2'-(2-methoxy-2-oxoethyl)-5-methyl-2-oxospiro[indoline-3,3'-pyrrolidine]-2',4',5'-tricarboxylate (1v) Major isomer:**

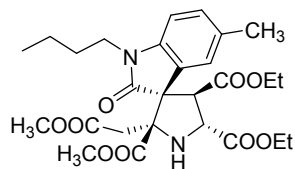

viscous oil, 59%;  $^1\text{H NMR}$  (400 MHz,  $\text{CDCl}_3$ )  $\delta$ : 7.06~7.03 (m, 2H, ArH), 6.68 (d,  $J = 8.0\text{Hz}$ , 1H, ArH), 4.72 (dd,  $J_1 = 8.0\text{Hz}$ ,  $J_2 = 6.4\text{Hz}$ , 1H, CH), 4.25 (q,  $J = 8.4\text{Hz}$ , 2H, CH), 4.17 (d,  $J = 8.4\text{Hz}$ , 1H, CH), 3.88~3.79 (m, 2H, CH), 3.77~3.69 (m, 2H, CH), 3.66 (s, 3H,  $\text{OCH}_3$ ), 3.65~3.51 (m, 2H, CH), 3.20 (s, 1H, NH), 3.19 (s, 3H,  $\text{OCH}_3$ ), 2.29 (s, 3H,  $\text{CH}_3$ ), 1.67~1.63 (m, 2H, CH), 1.48~1.42 (m, 2H, CH), 1.31 (t,  $J = 7.2\text{Hz}$ , 3H,  $\text{CH}_3$ ), 0.99 (t,  $J = 7.2\text{Hz}$ , 3H,  $\text{CH}_3$ ), 0.67 (t,  $J = 7.2\text{Hz}$ , 3H,  $\text{CH}_3$ );  $^{13}\text{C NMR}$  (100 MHz,  $\text{CDCl}_3$ )  $\delta$ : 173.4, 172.8, 171.3, 170.5, 168.4, 140.7, 131.5, 129.4, 125.9, 125.8, 107.3, 73.4, 61.6, 60.9, 60.3, 59.2, 54.0, 52.0, 51.6, 40.2, 40.1, 29.5, 21.0, 20.0, 14.0, 13.7, 13.3; IR(KBr)  $\nu$ : 3479, 1739, 1196 $\text{cm}^{-1}$ ; MS ( $m/z$ ): HRMS (ESI) Calcd. for  $\text{C}_{27}\text{H}_{36}\text{NaN}_2\text{O}_9$  ( $[\text{M}+\text{H}]^+$ ): 555.2319, found: 555.2323.

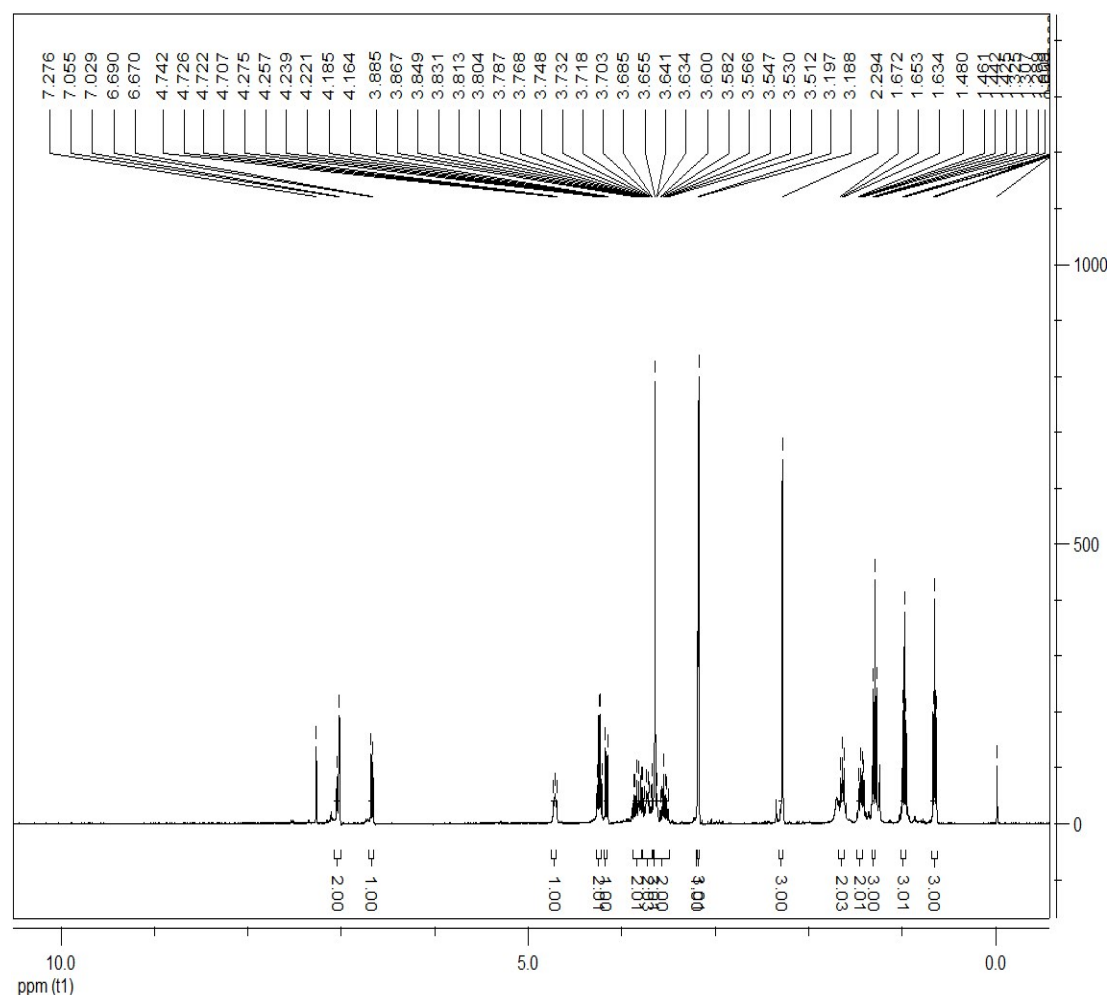

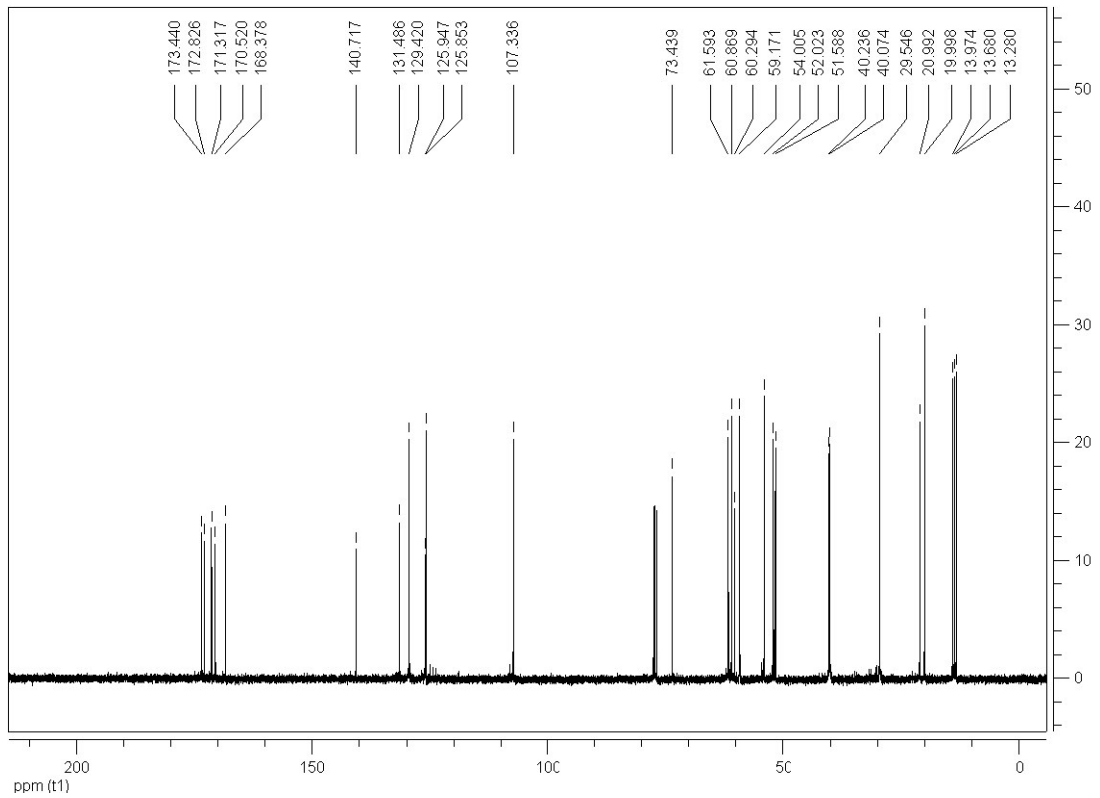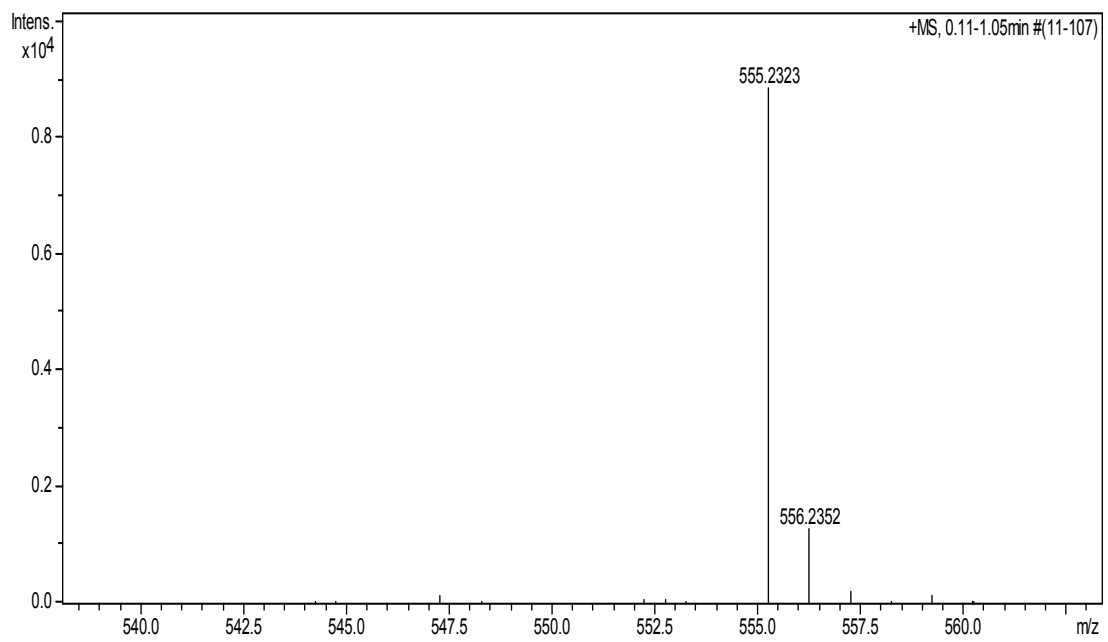

**4',5'-diethyl-2'-methyl-(2'S,3S,4'R,5'R)-1-butyl-2'-(2-methoxy-2-oxoethyl)-5-methyl-2-oxospiro[indoline-3,3'-pyrrolidine]-2',4',5'-tricarboxylate (1v') Minor isomer:**

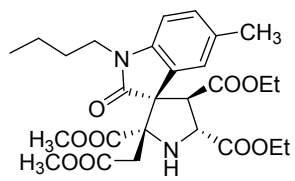

viscous oil, 14%;  $^1\text{H}$  NMR (400 MHz,  $\text{CDCl}_3$ )  $\delta$ : 7.16 (s, 1H, ArH), 7.10 (d,  $J = 8.0\text{Hz}$ , 1H, ArH), 6.73 (d,  $J = 8.0\text{Hz}$ , 1H, ArH), 4.72 (d,  $J = 7.6\text{Hz}$ , 1H, CH), 4.36~4.26 (m, 2H, CH), 4.21 (d,  $J = 8.0\text{Hz}$ , 1H, CH), 3.82~3.75 (m, 2H, CH), 3.72 (s, 3H,  $\text{OCH}_3$ ), 3.70~3.63 (m, 2H, CH), 3.60 (s, 3H,  $\text{OCH}_3$ ), 3.19 (d,  $J = 4.8\text{Hz}$ , 1H, NH), 2.46 (d,  $J = 17.2\text{Hz}$ , 1H,  $\text{CH}_2$ ), 2.31 (s, 3H,  $\text{CH}_3$ ), 2.09 (d,  $J = 17.2\text{Hz}$ , 1H,  $\text{CH}_2$ ), 1.68~1.62 (m, 2H, CH), 1.42~1.37 (m, 2H, CH), 1.34 (t,  $J = 7.2\text{Hz}$ , 3H,  $\text{CH}_3$ ), 0.97 (t,  $J = 7.6\text{Hz}$ , 3H,  $\text{CH}_3$ ), 0.66 (t,  $J = 7.2\text{Hz}$ , 3H,  $\text{CH}_3$ );  $^{13}\text{C}$  NMR (100 MHz,  $\text{CDCl}_3$ )  $\delta$ : 173.6, 172.8, 172.2, 171.8, 168.9, 140.9, 132.2, 129.6, 126.2, 126.1, 108.0, 72.1, 61.7, 61.4, 60.6, 59.9, 52.4, 51.8, 51.7, 40.1, 39.7, 29.5, 21.1, 20.0, 14.2, 13.7, 13.4; IR(KBr)  $\nu$ : 3355, 1740, 1200 $\text{cm}^{-1}$ ; MS ( $m/z$ ): HRMS (ESI) Calcd. for  $\text{C}_{27}\text{H}_{36}\text{N}_2\text{O}_9$  ( $[\text{M}+\text{H}]^+$ ): 555.2319, found: 555.2332.

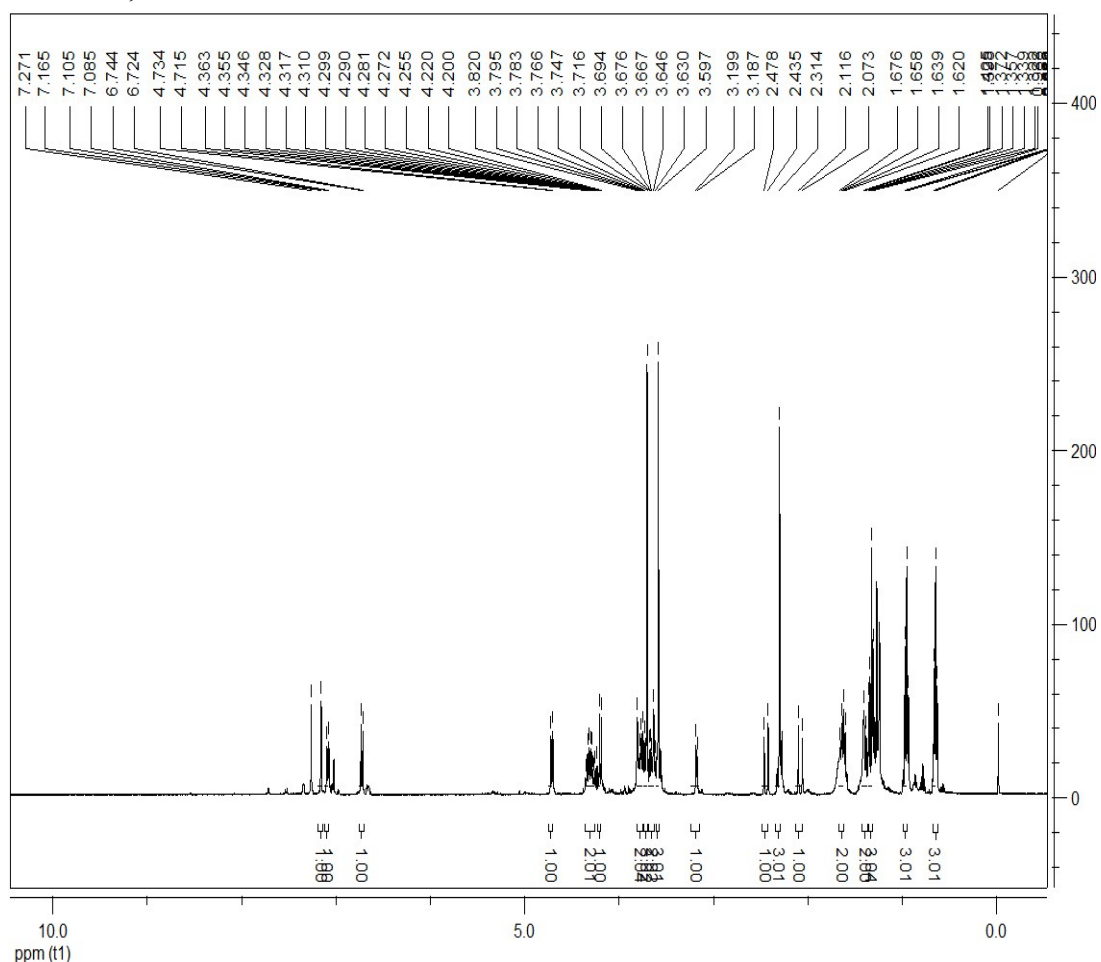



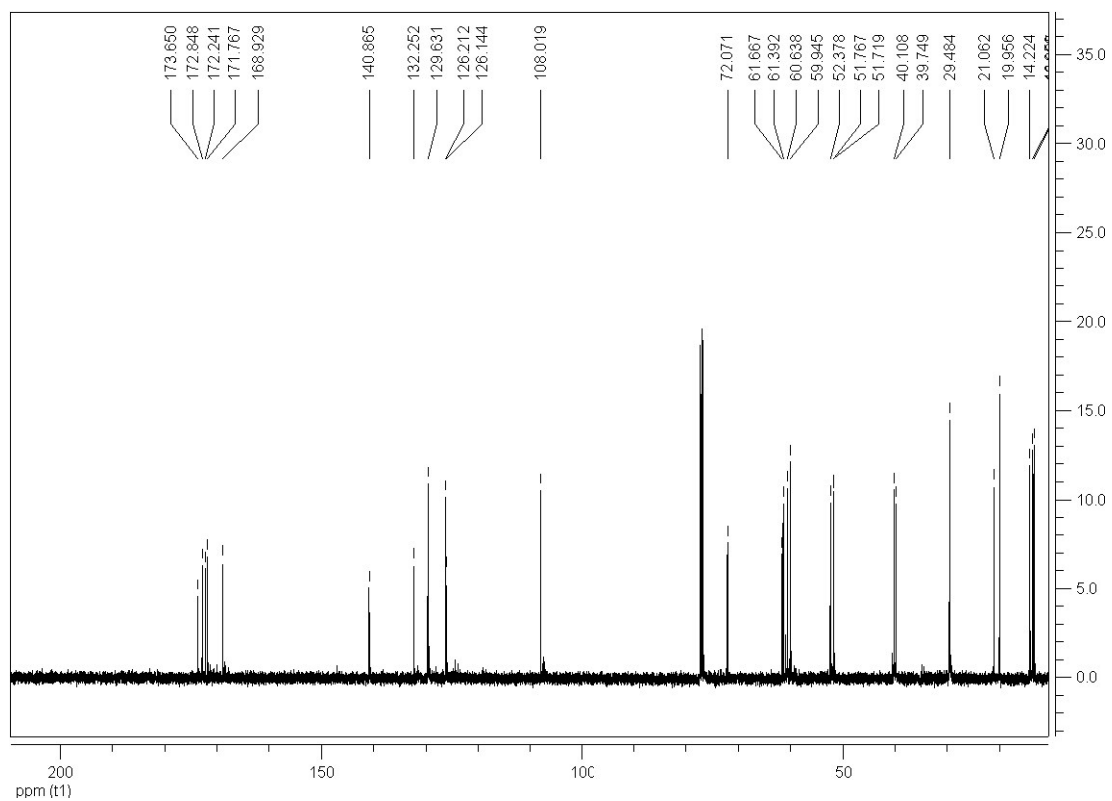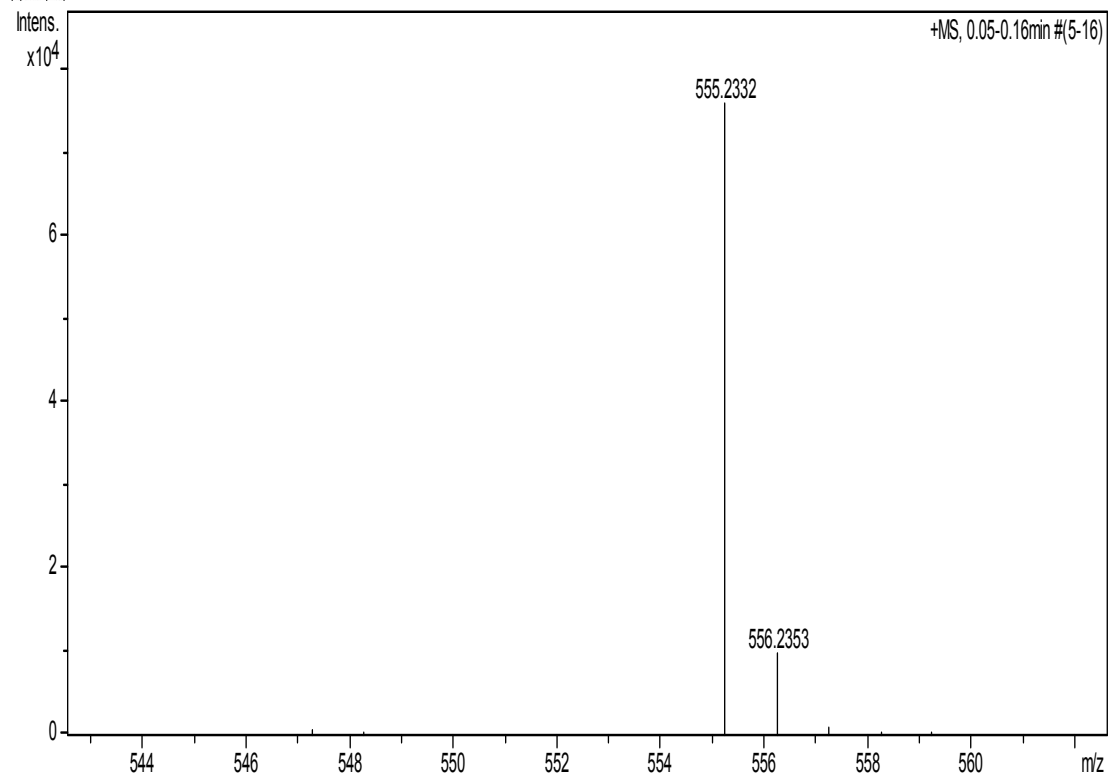

**Table S1.** Preliminary evaluation on the anticancer activities of synthesized compounds **1a-1v** on 4T1, CT26, HepG2 and A549 cancer cell lines (200  $\mu\text{g}\cdot\text{mL}^{-1}$ )

| Compound  |      | 4T1             |                   | CT26            |                   | HepG2           |                   | A549            |                   |
|-----------|------|-----------------|-------------------|-----------------|-------------------|-----------------|-------------------|-----------------|-------------------|
|           |      | Cell inhibition |                   | Cell inhibition |                   | Cell inhibition |                   | Cell inhibition |                   |
|           |      | %               | Mean $\pm$ SD     |
| <b>1a</b> | 24 h | 4.43            | 0.639 $\pm$ 0.012 | /               | 0.404 $\pm$ 0.015 | 6.41            | 0.301 $\pm$ 0.006 | 3.32            | 0.467 $\pm$ 0.037 |
|           | 48 h | 5.12            | 0.746 $\pm$ 0.023 | 11.06           | 0.522 $\pm$ 0.040 | 10.16           | 0.335 $\pm$ 0.015 | 2.70            | 0.675 $\pm$ 0.081 |
| <b>1b</b> | 24 h | /               | 0.708 $\pm$ 0.032 | 14.38           | 0.379 $\pm$ 0.006 | 24.32           | 0.255 $\pm$ 0.008 | 2.11            | 0.475 $\pm$ 0.010 |
|           | 48 h | 0.92            | 0.769 $\pm$ 0.045 | 14.76           | 0.475 $\pm$ 0.033 | 39.57           | 0.252 $\pm$ 0.008 | 38.32           | 0.448 $\pm$ 0.024 |
| <b>1c</b> | 24 h | 11.67           | 0.587 $\pm$ 0.023 | 3.06            | 0.421 $\pm$ 0.017 | 8.89            | 0.286 $\pm$ 0.014 | /               | 0.501 $\pm$ 0.026 |
|           | 48 h | 5.29            | 0.734 $\pm$ 0.019 | 10.14           | 0.579 $\pm$ 0.038 | 23.72           | 0.295 $\pm$ 0.006 | 7.99            | 0.643 $\pm$ 0.002 |
| <b>1d</b> | 24 h | 6.47            | 0.623 $\pm$ 0.018 | 10.95           | 0.406 $\pm$ 0.017 | 5.95            | 0.305 $\pm$ 0.019 | /               | 0.495 $\pm$ 0.005 |
|           | 48 h | 2.67            | 0.757 $\pm$ 0.030 | 1.01            | 0.540 $\pm$ 0.032 | /               | 0.369 $\pm$ 0.003 | 5.05            | 0.656 $\pm$ 0.003 |
| <b>1e</b> | 24 h | 38.45           | 0.434 $\pm$ 0.003 | 3.73            | 0.364 $\pm$ 0.015 | 22.63           | 0.287 $\pm$ 0.017 | 1.89            | 0.475 $\pm$ 0.014 |
|           | 48 h | 27.86           | 0.587 $\pm$ 0.043 | 3.88            | 0.408 $\pm$ 0.007 | 23.19           | 0.298 $\pm$ 0.005 | 21.81           | 0.554 $\pm$ 0.016 |
| <b>1f</b> | 24 h | 18.19           | 0.559 $\pm$ 0.023 | 4.69            | 0.336 $\pm$ 0.010 | /               | 0.323 $\pm$ 0.007 | 19.03           | 0.398 $\pm$ 0.011 |
|           | 48 h | 16.45           | 0.658 $\pm$ 0.043 | 8.32            | 0.262 $\pm$ 0.008 | 25.33           | 0.294 $\pm$ 0.006 | 15.60           | 0.586 $\pm$ 0.014 |
| <b>1g</b> | 24 h | 4.44            | 0.489 $\pm$ 0.006 | 16.46           | 0.341 $\pm$ 0.026 | 4.52            | 0.800 $\pm$ 0.068 | /               | 0.472 $\pm$ 0.005 |
|           | 48 h | 18.13           | 0.800 $\pm$ 0.033 | /               | 0.256 $\pm$ 0.009 | /               | 0.892 $\pm$ 0.023 | 1.89            | 0.598 $\pm$ 0.033 |
| <b>1h</b> | 24 h | /               | 0.535 $\pm$ 0.037 | /               | 0.332 $\pm$ 0.022 | /               | 0.884 $\pm$ 0.035 | 0.37            | 0.373 $\pm$ 0.013 |
|           | 48 h | 2.29            | 0.944 $\pm$ 0.017 | /               | 0.244 $\pm$ 0.008 | /               | 0.927 $\pm$ 0.031 | 0.67            | 0.671 $\pm$ 0.018 |
| <b>1i</b> | 24 h | 14.53           | 0.443 $\pm$ 0.048 | 4.63            | 0.376 $\pm$ 0.003 | 5.25            | 0.798 $\pm$ 0.009 | /               | 0.446 $\pm$ 0.014 |
|           | 48 h | 7.74            | 0.894 $\pm$ 0.041 | /               | 0.565 $\pm$ 0.043 | /               | 0.897 $\pm$ 0.030 | 4.60            | 0.634 $\pm$ 0.039 |
| <b>1j</b> | 24 h | 5.90            | 0.482 $\pm$ 0.015 | 4.72            | 0.446 $\pm$ 0.022 | /               | 0.842 $\pm$ 0.056 | 12.59           | 0.415 $\pm$ 0.009 |
|           | 48 h | 15.95           | 0.828 $\pm$ 0.027 | /               | 0.599 $\pm$ 0.003 | /               | 0.896 $\pm$ 0.018 | 14.66           | 0.529 $\pm$ 0.019 |
| <b>1k</b> | 24 h | /               | 0.507 $\pm$ 0.047 | 1.89            | 0.423 $\pm$ 0.008 | 2.17            | 0.829 $\pm$ 0.044 | /               | 0.468 $\pm$ 0.009 |
|           | 48 h | 25.75           | 0.737 $\pm$ 0.037 | 3.31            | 0.552 $\pm$ 0.027 | 33.19           | 0.628 $\pm$ 0.027 | /               | 0.617 $\pm$ 0.009 |
| <b>1l</b> | 24 h | /               | 0.548 $\pm$ 0.034 | /               | 0.417 $\pm$ 0.002 | 6.00            | 0.804 $\pm$ 0.018 | 11.19           | 0.422 $\pm$ 0.011 |
|           | 48 h | 23.32           | 0.768 $\pm$ 0.036 | /               | 0.543 $\pm$ 0.002 | 34.43           | 0.617 $\pm$ 0.042 | /               | 0.626 $\pm$ 0.019 |
| <b>1m</b> | 24 h | 14.56           | 0.444 $\pm$ 0.016 | 0.56            | 0.423 $\pm$ 0.021 | /               | 0.853 $\pm$ 0.018 | /               | 0.475 $\pm$ 0.019 |
|           | 48 h | 26.38           | 0.743 $\pm$ 0.010 | /               | 0.500 $\pm$ 0.002 | /               | 0.940 $\pm$ 0.010 | 8.43            | 0.568 $\pm$ 0.014 |
| <b>1n</b> | 24 h | /               | 0.809 $\pm$ 0.024 | /               | 0.495 $\pm$ 0.016 | /               | 1.028 $\pm$ 0.058 | /               | 0.471 $\pm$ 0.001 |
|           | 48 h | /               | 1.228 $\pm$ 0.051 |                 | 0.587 $\pm$ 0.033 | 6.11            | 0.836 $\pm$ 0.013 | /               | 0.674 $\pm$ 0.017 |
| <b>1o</b> | 24 h | /               | 0.735 $\pm$ 0.039 | /               | 0.433 $\pm$ 0.018 | /               | 0.875 $\pm$ 0.053 | 24.30           | 0.368 $\pm$ 0.002 |
|           | 48 h | /               | 1.257 $\pm$ 0.035 | 4.06            | 0.563 $\pm$ 0.022 | 52.77           | 0.455 $\pm$ 0.032 | 27.87           | 0.458 $\pm$ 0.003 |
| <b>1p</b> | 24 h | 27.91           | 0.385 $\pm$ 0.028 | 14.57           | 0.503 $\pm$ 0.007 | /               | 0.851 $\pm$ 0.019 | /               | 0.472 $\pm$ 0.004 |
|           | 48 h | 41.18           | 0.629 $\pm$ 0.048 | /               | 0.656 $\pm$ 0.044 | 1.83            | 0.869 $\pm$ 0.016 | /               | 0.650 $\pm$ 0.002 |
| <b>1q</b> | 24 h | /               | 0.622 $\pm$ 0.016 | 3.19            | 0.436 $\pm$ 0.006 | 10.94           | 0.792 $\pm$ 0.037 | /               | 0.465 $\pm$ 0.016 |

|           |      |       |             |       |             |       |             |       |             |
|-----------|------|-------|-------------|-------|-------------|-------|-------------|-------|-------------|
|           | 48 h | 4.65  | 0.941±0.008 | 9.86  | 0.497±0.021 | 28.31 | 0.790±0.013 | /     | 0.604±0.008 |
| <b>1r</b> | 24 h | 2.53  | 0.603±0.020 | 6.09  | 0.383±0.012 | 14.03 | 0.770±0.018 | /     | 0.458±0.003 |
|           | 48 h | 15.54 | 0.844±0.071 | 8.63  | 0.525±0.028 | 29.50 | 0.784±0.019 | 0.58  | 0.584±0.003 |
| <b>1s</b> | 24 h | 21.90 | 0.495±0.019 | 13.10 | 0.435±0.009 | /     | 0.891±0.026 | /     | 0.450±0.046 |
|           | 48 h | 29.39 | 0.734±0.038 | 18.91 | 0.505±0.009 | 24.44 | 0.837±0.016 | 14.02 | 0.521±0.018 |
| <b>1t</b> | 24 h | /     | 0.820±0.014 | /     | 0.404±0.015 | /     | 1.112±0.040 | 4.90  | 0.446±0.001 |
|           | 48 h | /     | 1.263±0.056 | /     | 0.522±0.040 | 47.62 | 0.623±0.042 | 3.02  | 0.578±0.015 |
| <b>1u</b> | 24 h | /     | 0.872±0.024 | 4.00  | 0.379±0.006 | 24.94 | 0.682±0.080 | 6.76  | 0.430±0.001 |
|           | 48 h | 7.22  | 0.923±0.114 | 6.28  | 0.475±0.033 | 67.14 | 0.408±0.038 | 13.79 | 0.517±0.010 |
| <b>1v</b> | 24 h | /     | 0.712±0.042 | 17.64 | 0.421±0.017 | 40.39 | 0.545±0.051 | /     | 0.468±0.019 |
|           | 48 h | 9.05  | 0.910±0.045 | 28.84 | 0.579±0.038 | 10.44 | 0.875±0.021 | 2.36  | 0.575±0.028 |

/ : no activity

**Table S2.** Preliminary evaluation on the anticancer activities of synthesized compounds **2a-2n** on 4T1, CT26, HepG2 and A549 cancer cell lines (200 µg·mL<sup>-1</sup>)

| Compound  |      | 4T1             |             | CT26            |             | HepG2           |             | A549            |             |
|-----------|------|-----------------|-------------|-----------------|-------------|-----------------|-------------|-----------------|-------------|
|           |      | Cell inhibition |             | Cell inhibition |             | Cell inhibition |             | Cell inhibition |             |
|           |      | %               | Mean ± SD   |
| <b>2a</b> | 24 h | 41.62           | 0.389±0.043 | 14.72           | 0.336±0.010 | 28.22           | 0.308±0.007 | 39.95           | 0.306±0.010 |
|           | 48 h | 37.37           | 0.534±0.020 | 23.60           | 0.262±0.008 | <b>52.91</b>    | 0.184±0.008 | 39.28           | 0.483±0.022 |
| <b>2b</b> | 24 h | 36.64           | 0.415±0.005 | /               | 0.341±0.026 | 20.48           | 0.215±0.003 | 33.19           | 0.320±0.008 |
|           | 48 h | 38.90           | 0.522±0.034 | 3.84            | 0.256±0.009 | 37.90           | 0.331±0.005 | 30.89           | 0.325±0.013 |
| <b>2c</b> | 24 h | 2.63            | 0.598±0.027 | 0.28            | 0.332±0.022 | /               | 0.318±0.004 | 27.03           | 0.556±0.025 |
|           | 48 h | 8.01            | 0.745±0.038 | 16.64           | 0.244±0.008 | 7.86            | 0.370±0.008 | 26.63           | 0.560±0.106 |
| <b>2d</b> | 24 h | 1.53            | 0.618±0.140 | 5.05            | 0.376±0.003 | 13.09           | 0.278±0.005 | 18.22           | 0.383±0.011 |
|           | 48 h | 12.67           | 0.711±0.009 | 7.84            | 0.565±0.043 | 24.43           | 0.317±0.005 | 18.39           | 0.617±0.015 |
| <b>2e</b> | 24 h | /               | 0.893±0.210 | 28.98           | 0.446±0.022 | 3.31            | 0.299±0.020 | /               | 0.507±0.004 |
|           | 48 h | /               | 0.919±0.045 | 26.11           | 0.599±0.003 | <b>55.47</b>    | 0.231±0.027 | 42.24           | 0.461±0.002 |
| <b>2f</b> | 24 h | 32.64           | 0.457±0.006 | 12.06           | 0.423±0.008 | 16.71           | 0.266±0.011 | 23.47           | 0.334±0.011 |
|           | 48 h | 33.04           | 0.566±0.024 | 23.30           | 0.552±0.027 | 17.35           | 0.344±0.007 | 28.48           | 0.572±0.002 |
| <b>2g</b> | 24 h | 24.51           | 0.488±0.011 | 13.40           | 0.417±0.002 | 32.25           | 0.237±0.016 | 25.21           | 0.325±0.021 |
|           | 48 h | 34.30           | 0.560±0.041 | 31.95           | 0.543±0.002 | 23.97           | 0.329±0.010 | 18.82           | 0.598±0.021 |
| <b>2h</b> | 24 h | 29.56           | 0.486±0.010 | 17.21           | 0.423±0.021 | 22.08           | 0.197±0.010 | 14.83           | 0.384±0.016 |
|           | 48 h | 31.17           | 0.601±0.059 | 30.26           | 0.500±0.002 | <b>50.59</b>    | 0.360±0.016 | 17.56           | 0.642±0.041 |
| <b>2i</b> | 24 h | 38.94           | 0.417±0.013 | 2.41            | 0.495±0.016 | 21.07           | 0.213±0.005 | 35.90           | 0.304±0.009 |
|           | 48 h | 34.45           | 0.553±0.043 | 21.59           | 0.587±0.033 | 42.58           | 0.329±0.007 | 39.80           | 0.507±0.03  |
| <b>2j</b> | 24 h | /               | 0.673±0.040 | <b>62.84</b>    | 0.433±0.018 | 21.15           | 0.268±0.019 | 2.28            | 0.455±0.024 |
|           | 48 h | 25.76           | 0.620±0.057 | <b>88.58</b>    | 0.563±0.022 | 43.48           | 0.267±0.006 | 40.89           | 0.460±0.035 |

|           |      |       |             |       |             |              |             |       |             |
|-----------|------|-------|-------------|-------|-------------|--------------|-------------|-------|-------------|
| <b>2k</b> | 24 h | 5.14  | 0.636±0.097 | 0.41  | 0.503±0.007 | 13.72        | 0.298±0.005 | 5.23  | 0.452±0.035 |
|           | 48 h | 24.18 | 0.630±0.033 | 14.66 | 0.656±0.044 | 21.05        | 0.302±0.008 | 5.82  | 0.646±0.013 |
| <b>2l</b> | 24 h | /     | 1.035±0.005 | 12.11 | 0.436±0.006 | 2.77         | 0.329±0.019 | /     | 0.474±0.006 |
|           | 48 h | /     | 0.859±0.088 | 9.57  | 0.497±0.021 | 14.94        | 0.319±0.009 | 16.40 | 0.580±0.006 |
| <b>2m</b> | 24 h | /     | 0.716±0.035 | 18.64 | 0.383±0.012 | 18.82        | 0.267±0.018 | /     | 0.497±0.022 |
|           | 48 h | 2.79  | 0.749±0.093 | 16.19 | 0.525±0.028 | 45.80        | 0.239±0.003 | 20.71 | 0.564±0.005 |
| <b>2n</b> | 24 h | 6.23  | 0.621±0.028 | 19.83 | 0.435±0.009 | <b>57.58</b> | 0.199±0.019 | 0.20  | 0.452±0.010 |
|           | 48 h | 6.98  | 0.724±0.048 | 25.54 | 0.505±0.009 | <b>59.86</b> | 0.194±0.026 | 5.52  | 0.683±0.014 |

/ : no activity
